# Supplementary material for: DONORS (Donation Network to Optimise Organ Recovery Study): Study protocol to evaluate the implementation of an evidence-based checklist for brain-dead potential organ donor management in intensive care units, a cluster randomised trial
Source: PubMed Central journal article supplement — BMJ Open. 2019 Jun 25;9(6):e028570. doi: 10.1136/bmjopen-2018-028570 (PMC6597655; doi:10.1136/bmjopen-2018-028570), 2019-06-25
Supplement: bmjopen-2018-028570.draft_revisions.pdf [file bmjopen-2018-028570.draft_revisions.pdf]

# BMJ Open

BMJ Open is committed to open peer review. As part of this commitment we make the peer review history of every article we publish publicly available.

When an article is published we post the peer reviewers' comments and the authors' responses online. We also post the versions of the paper that were used during peer review. These are the versions that the peer review comments apply to.

The versions of the paper that follow are the versions that were submitted during the peer review process. They are not the versions of record or the final published versions. They should not be cited or distributed as the published version of this manuscript.

BMJ Open is an open access journal and the full, final, typeset and author-corrected version of record of the manuscript is available on our site with no access controls, subscription charges or pay-per-view fees (<http://bmjopen.bmj.com>).

If you have any questions on BMJ Open's open peer review process please email [info.bmjopen@bmj.com](mailto:info.bmjopen@bmj.com)

# BMJ Open

**DONORS (Donation Network to Optimise Organ Recovery Study): Study protocol to evaluate the implementation of an evidence-based checklist for potential brain-dead donor organ management in intensive care units, a cluster randomised trial**

|                               |                                                                                                                                                                                                                                                                                                                                                                                                                                                                                                                                                                                                                                                                                                                                                                                                                                                                                                                                                                                                                                                                                                                                                                                                                                                                                                                                                                                                                                                                                                                                                                                                                                                                                                                                                                                                                   |
|-------------------------------|-------------------------------------------------------------------------------------------------------------------------------------------------------------------------------------------------------------------------------------------------------------------------------------------------------------------------------------------------------------------------------------------------------------------------------------------------------------------------------------------------------------------------------------------------------------------------------------------------------------------------------------------------------------------------------------------------------------------------------------------------------------------------------------------------------------------------------------------------------------------------------------------------------------------------------------------------------------------------------------------------------------------------------------------------------------------------------------------------------------------------------------------------------------------------------------------------------------------------------------------------------------------------------------------------------------------------------------------------------------------------------------------------------------------------------------------------------------------------------------------------------------------------------------------------------------------------------------------------------------------------------------------------------------------------------------------------------------------------------------------------------------------------------------------------------------------|
| Journal:                      | <i>BMJ Open</i>                                                                                                                                                                                                                                                                                                                                                                                                                                                                                                                                                                                                                                                                                                                                                                                                                                                                                                                                                                                                                                                                                                                                                                                                                                                                                                                                                                                                                                                                                                                                                                                                                                                                                                                                                                                                   |
| Manuscript ID                 | bmjopen-2018-028570                                                                                                                                                                                                                                                                                                                                                                                                                                                                                                                                                                                                                                                                                                                                                                                                                                                                                                                                                                                                                                                                                                                                                                                                                                                                                                                                                                                                                                                                                                                                                                                                                                                                                                                                                                                               |
| Article Type:                 | Protocol                                                                                                                                                                                                                                                                                                                                                                                                                                                                                                                                                                                                                                                                                                                                                                                                                                                                                                                                                                                                                                                                                                                                                                                                                                                                                                                                                                                                                                                                                                                                                                                                                                                                                                                                                                                                          |
| Date Submitted by the Author: | 14-Dec-2018                                                                                                                                                                                                                                                                                                                                                                                                                                                                                                                                                                                                                                                                                                                                                                                                                                                                                                                                                                                                                                                                                                                                                                                                                                                                                                                                                                                                                                                                                                                                                                                                                                                                                                                                                                                                       |
| Complete List of Authors:     | <p>Westphal, Glauco; Hospital Moinhos de Vento (HMV), Research Projects Office</p> <p>Robinson, Caroline; Hospital Moinhos de Vento (HMV), Research Projects Office</p> <p>Biasi, Alexandre ; Universidade Federal de Sao Paulo; Hospital do Coração (HCor)</p> <p>Machado, Flávia; Universidade Federal de São Paulo (UNIFESP)</p> <p>Rosa, Regis; Hospital Moinhos de Vento (HMV), Intensive Care Unit</p> <p>Teixeira, Cassiano; Hospital Moinhos de Vento (HMV), Intensive Care Unit</p> <p>de Andrade, Joel; Organ Procurement Organization of Santa Catarina (OPO/SC)</p> <p>Franke, Cristiano Augusto; Hospital das Clínicas de Porto Alegre (HCPA), Adult Intensive Care Unit</p> <p>Azevedo, Luciano Cesar; Hospital Sírio-Libanês, Intensive Care Unit</p> <p>Bozza, Fernando; Department of Critical Care and Graduate Program in Translational Medicine, D'Or Institute for Research and Education, Rio de Janeiro, Brazil</p> <p>Guterres, Cátia; Hospital Moinhos de Vento (HMV), Research Projects Office</p> <p>da Silva, Daiana; Hospital Moinhos de Vento (HMV), Intensive Care Unit</p> <p>Sganzerla, Daniel; Hospital Moinhos de Vento (HMV), Research Projects Office</p> <p>do Prado, Débora; Hospital Moinhos de Vento (HMV), Research Projects Office</p> <p>Madalena, Itiana; Hospital Moinhos de Vento (HMV), Research Projects Office</p> <p>Rohden, Adriane Isabel; Hospital Moinhos de Vento (HMV), Research Projects Office</p> <p>da Silva, Sabrina; Hospital Moinhos de Vento (HMV), Research Projects Office</p> <p>Giordani, Natalia Elis; Hospital Moinhos de Vento (HMV), Research Projects Office</p> <p>Andrighetto, Luiza; Hospital Moinhos de Vento (HMV), Research Projects Office</p> <p>Benck, Patrícia; Hospital Moinhos de Vento (HMV), Research Projects Office</p> |

|           |                                                                                                                                                                                                                                                                                                                                                                                                                                                                                                                                                                                                                                                                                                                                                                                                                                                                                                                                                                                                                                                                                                                                                                                                                                                                                                                                                                                                                                                                                                                                                              |
|-----------|--------------------------------------------------------------------------------------------------------------------------------------------------------------------------------------------------------------------------------------------------------------------------------------------------------------------------------------------------------------------------------------------------------------------------------------------------------------------------------------------------------------------------------------------------------------------------------------------------------------------------------------------------------------------------------------------------------------------------------------------------------------------------------------------------------------------------------------------------------------------------------------------------------------------------------------------------------------------------------------------------------------------------------------------------------------------------------------------------------------------------------------------------------------------------------------------------------------------------------------------------------------------------------------------------------------------------------------------------------------------------------------------------------------------------------------------------------------------------------------------------------------------------------------------------------------|
|           | <p>Roman, Fernando Roberto; Hospital Bom Jesus de Toledo, Adult Intensive Care Unit</p> <p>de Melo, Maria de Fátima; Hospital da Restauração, Adult Intensive Care Unit</p> <p>Pereira, Thattylene; Hospital de Pronto Socorro João Paulo II, Adult Intensive Care Unit</p> <p>Grion, Cintia; Hospital Evangélico de Londrina, Adult Intensive Care Unit; Hospital Universitário Regional do Norte do Paraná, Adult Intensive Care Unit</p> <p>Diniz, Pedro; Hospital de Ensino Doutor Washington Antônio de Barros, Adult Intensive Care Unit</p> <p>Oliveira, João Fernando; Hospital de Base de São José do Rio Preto, Adult Intensive Care Unit</p> <p>Mecatti, Giovana; Hospital Universitário São Francisco da Providência de Deus de Bragança Paulista, Adult Intensive Care Unit</p> <p>Alves, Flávio André; Hospital Cristo Redentor, Adult Intensive Care Unit</p> <p>Moraes, Rafael Barberena; Hospital de Clínicas de Porto Alegre (HCPA), Adult Intensive Care Unit</p> <p>Nobre, Vandack; Universidade Federal de Minas Gerais, Adult Intensive Care Unit</p> <p>Hammes, Luciano; Hospital Moinhos de Vento, Superintendence</p> <p>Meade, Maureen; McMaster University, Department of Medicine and Department of Health Evidence and Impact</p> <p>Nothen, Rosana; Universidade Federal do Rio Grande do Sul (UFRGS), General Hospital of the School of Medicine; Ministério da Saúde, General Co-ordination Office of the National Transplant System</p> <p>Falavigna, Maicon; Hospital Moinhos de Vento (HMV), Research Projects Office</p> |
| Keywords: | brain death, cardiac arrest, organ donation, checklist, quality improvement                                                                                                                                                                                                                                                                                                                                                                                                                                                                                                                                                                                                                                                                                                                                                                                                                                                                                                                                                                                                                                                                                                                                                                                                                                                                                                                                                                                                                                                                                  |
|           |                                                                                                                                                                                                                                                                                                                                                                                                                                                                                                                                                                                                                                                                                                                                                                                                                                                                                                                                                                                                                                                                                                                                                                                                                                                                                                                                                                                                                                                                                                                                                              |

SCHOLARONE™  
Manuscripts

1 **DONORS (Donation Network to Optimise Organ Recovery Study): Study protocol**  
2 **to evaluate the implementation of an evidence-based checklist for potential brain-**  
3 **dead donor organ management in intensive care units, a cluster randomised trial**

4  
5 Glauco Adrieno Westphal,<sup>1</sup> Caroline Cabral Robinson,<sup>2</sup> Alexandre Biasi Cavalcanti,<sup>3</sup>  
6 Flávia Ribeiro Machado,<sup>4</sup> Regis Goulart Rosa,<sup>5</sup> Cassiano Teixeira,<sup>5</sup> Joel de Andrade,<sup>6</sup>  
7 Cristiano Augusto Franke,<sup>7</sup> Luciano Cesar Pontes Azevedo,<sup>8</sup> Fernando Augusto Bozza,<sup>9</sup>  
8 Cátia Moreira Guterres,<sup>2</sup> Daiana Barbosa da Silva,<sup>5</sup> Daniel Sganzerla,<sup>2</sup> Débora  
9 Zechmeister do Prado,<sup>2</sup> Itiana Cardoso Madalena,<sup>2</sup> Adriane Isabel Rohden,<sup>2</sup>  
10 Sabrina Souza da Silva,<sup>2</sup> Natalia Elis Giordani,<sup>2</sup> Luiza Vitelo Andrighetto,<sup>2</sup>  
11 Patrícia Spessatto Benck,<sup>2</sup> Fernando Roberto Roman,<sup>10</sup> Maria de Fátima Rodrigues  
12 Buarque de Melo,<sup>11</sup> Thattyane Borba Pereira,<sup>12</sup> Cintia Magalhães Carvalho Grion,<sup>13</sup>  
13 Pedro Carvalho Diniz,<sup>14</sup> João Fernando Picollo de Oliveira,<sup>15</sup> Giovana Colozza  
14 Mecatti,<sup>16</sup> Flávio André Cardona Alves,<sup>17</sup> Rafael Barberena Moraes,<sup>18</sup> Vandack Nobre,<sup>19</sup>  
15 Luciano Serpa Hammes,<sup>20</sup> Maurren O. Meade,<sup>21</sup> Rosana Reis Nothen,<sup>22</sup>  
16 Maicon Falavigna<sup>2</sup> on behalf of the DONORS (Donation Network for Organ Recovery  
17 Study) Investigators and the BRICNet\*

18  
19 <sup>1</sup> Centro Hospitalar Unimed; Hospital Municipal São José, Joinville, SC, Brazil;  
20 Research Projects Office, Hospital Moinhos de Vento (HMV), Porto Alegre, RS, Brazil.

21 <sup>2</sup> Research Projects Office, HMV, Porto Alegre, RS, Brazil.

22 <sup>3</sup> Research Institute, Hospital do Coração (HCor), São Paulo, SP, Brazil

23 <sup>4</sup> Department of Anaesthesiology, Pain and Intensive Care, Universidade Federal de São  
24 Paulo (UNIFESP), São Paulo, SP, Brazil.

25 <sup>5</sup> Adult Intensive Care Unit, HMV, Porto Alegre, RS, Brazil.

- 1  
2  
3 26 <sup>6</sup> Organ Procurement Organization of Santa Catarina (OPO/SC), Florianópolis, SC,  
4  
5 27 Brazil.  
6  
7 28 <sup>7</sup> Adult Intensive Care Unit, Hospital das Clínicas de Porto Alegre (HCPA); Trauma  
8  
9 29 Intensive Care Unit, Hospital de Pronto de Socorro (HPS), Porto Alegre, RS, Brazil.  
10  
11 30 <sup>8</sup> Intensive Care Unit, Hospital Sírio-Libanês. São Paulo, SP, Brazil.  
12  
13 31 <sup>9</sup> National Institute of Infectious Disease Evandro Chagas, Fundação Oswaldo Cruz  
14  
15 32 (FIOCRUZ); D'Or Institute for Research and Education (IDOR). Rio de Janeiro, RJ,  
16  
17 33 Brazil.  
18  
19 34 <sup>10</sup> Adult Intensive Care Unit, Hospital Bom Jesus de Toledo, Toledo, PR, Brazil.  
20  
21 35 <sup>11</sup> Adult Intensive Care Unit, Hospital da Restauração, Recife, PE, Brazil.  
22  
23 36 <sup>12</sup> Adult Intensive Care Unit, Hospital de Pronto Socorro João Paulo II, Porto Velho,  
24  
25 37 RO, Brazil.  
26  
27 38 <sup>13</sup> Adult Intensive Care Unit, Hospital Evangélico de Londrina; Hospital Universitário  
28  
29 39 Regional do Norte do Paraná, Londrina, PR, Brazil.  
30  
31 40 <sup>14</sup> Adult Intensive Care Unit, Hospital de Ensino Doutor Washington Antônio de Barros,  
32  
33 41 Petrolina, PE, Brazil.  
34  
35 42 <sup>15</sup> Adult Intensive Care Unit, Hospital de Base de São José do Rio Preto, São José do  
36  
37 43 Rio Preto, SP, Brazil.  
38  
39 44 <sup>16</sup> Adult Intensive Care Unit, Hospital Universitário São Francisco da Providência de  
40  
41 45 Deus de Bragança Paulista (HUSF). Bragança Paulista, SP, Brazil.  
42  
43 46 <sup>17</sup> Adult Intensive Care Unit, Hospital Cristo Redentor, Porto Alegre, RS, Brazil.  
44  
45 47 <sup>18</sup> Adult Intensive Care Unit, HCPA, Porto Alegre, RS, Brazil.  
46  
47 48 <sup>19</sup> Adult Intensive Care Unit, Hospital das Clínicas, Universidade Federal de Minas  
48  
49 49 Gerais (UFMG), Belo Horizonte, MG, Brazil.  
50  
51 50 <sup>20</sup> Superintendence, H MV, Porto Alegre, RS, Brazil.  
52  
53  
54  
55  
56  
57  
58  
59  
60

1  
2  
3 51 <sup>21</sup> Department of Medicine and Department of Health Evidence and Impact, McMaster  
4  
5 52 University, Hamilton, ON, Canada.

6  
7 53 <sup>22</sup> General Hospital of the School of Medicine, Universidade Federal do Rio Grande do  
8  
9 54 Sul (UFGRS), Porto Alegre, RS, Brazil; General Co-ordination Office of the National  
10  
11 55 Transplant System, Ministério da Saúde, Brasília, DF, Brazil.

12  
13  
14 56

15  
16  
17 57 **Corresponding author**

18  
19 58 Glauco Adrieno Westphal

20  
21 59 Rua Ramiro Barcelos, 910

22  
23 60 90035-001, Porto Alegre, RS

24  
25 61 Brazil

26  
27 62 E-mail: glauco.ww@gmail.com

28  
29 63 Tel.:+55-47-99964.2295

30  
31  
32 64

33  
34  
35 65 **Word count** (excluding title page, abstract, references, figures and tables): 3734

1  
2  
3 66 **ABSTRACT**  
4

5 67 **Introduction:** There is an increasing demand for multi-organ donors for organ  
6  
7  
8 68 transplantation programmes. This study protocol describes the Donation Network to  
9  
10 69 Optimise Organ Recovery Study (DONORS), a planned cluster randomised controlled  
11  
12 70 trial that aims to evaluate the effectiveness of the implementation of an evidence-based  
13  
14 71 goal-directed checklist for potential brain-dead donor management in intensive care  
15  
16 72 units (ICUs) in reducing the loss of potential donors due to cardiac arrest.  
17

18  
19 73 **Methods and analysis:** The study will include ICUs of at least 60 Brazilian sites with  
20  
21 74 an average of >10 annual notifications of valid potential organ donors. Hospitals will be  
22  
23 75 randomly assigned (with a 1:1 allocation ratio) to the intervention group, which will  
24  
25 76 involve the implementation of an evidence-based goal-directed checklist for potential  
26  
27 77 organ donor maintenance, or the control group, which will maintain the usual care  
28  
29 78 practices of the ICU. Team members from all participating ICUs will receive training on  
30  
31 79 how to conduct family interviews for organ donation. The primary outcome will be loss  
32  
33 80 of potential donors due to cardiac arrest. Secondary outcomes will include the number  
34  
35 81 of actual organ donors, the number of organs recovered per actual donor, and the total  
36  
37 82 number of cardiac arrests among all potential organ donors.  
38  
39

40  
41  
42 83 **Ethics and dissemination:** The Institutional Review Board of the Co-ordinating  
43  
44 84 institution and of each participating site must individually approve the study. We will  
45  
46 85 request a waiver of prospective informed consent from substitute decision makers.  
47  
48 86 Study results will be disseminated to the general medical community through  
49  
50 87 publications in peer-reviewed medical journals.  
51

52  
53 88 **Keywords:** brain death, cardiac arrest, organ donation, checklist, quality improvement  
54

55  
56 89 **Trial registration:** ClinicalTrials.gov, NCT03179020, registered 23 March 2017.  
57  
58  
59  
60

1  
2  
3 90 **Strengths and limitations of this study**  
4

- 5 91 • This is the first randomised trial to evaluate whether a goal-directed checklist for  
6  
7  
8 92 the management of potential brain-dead donors may be useful in reducing  
9  
10 93 cardiac arrests and contributing to increase organ availability for transplants.  
11  
12 94 • The preparation of the goal-directed checklist was preceded by the review of a  
13  
14 95 clinical practice guideline following the Grades of Recommendation  
15  
16 96 Assessment, Development and Evaluation (GRADE) system.  
17  
18  
19 97 • Brazil is a country with a wide spectrum of demographic and socioeconomic  
20  
21 98 scenarios; the diversity of institutions to be included in DONORS will allow us  
22  
23 99 to provide results in a broad range of demographic and socioeconomic scenarios.  
24  
25  
26 100 • Main study limitations are the unblinded design and the high heterogeneity of  
27  
28 101 care and outcomes expected among centres in the study.  
29  
30  
31  
32  
33  
34  
35  
36  
37  
38  
39  
40  
41  
42  
43  
44  
45  
46  
47  
48  
49  
50  
51  
52  
53  
54  
55  
56  
57  
58  
59  
60



## 102 INTRODUCTION

103 Organ transplantation is the only treatment option for many patients affected  
104 by end-stage organ failure. Despite advances in the field of organ donation, the disparity  
105 between the number of patients on transplant waiting lists and the availability of organs  
106 for transplantation is increasing. Several parameters determine the availability of  
107 suitable organs for donation, and many of these depend on a successful sequence of  
108 actions by several healthcare professionals, starting with the identification of a potential  
109 multi-organ donor and ending with surgical organ procurement.[1-4] In this process,  
110 important factors contributing to the gap between organ supply and demand include  
111 failure to identify and report brain death, lack of family consent for organ donation,  
112 inaccurate perceptions of contraindications to organ donation, and haemodynamic  
113 instability that may compromise the quality of organs or even lead to loss of donors due  
114 to cardiac arrest.[1-3] A systematic application of clinical management strategies  
115 aiming the haemodynamic stabilisation of brain-dead donors may contribute to an  
116 increase in the number of organs for transplantation by improving the quality of organs  
117 and reducing the loss of potential donors due to cardiac arrest.[1, 2, 4] In addition, other  
118 measures such as optimal ventilatory support and temperature control may improve the  
119 quality of organs, resulting in a higher organ recovery rate and better clinical outcomes  
120 for transplant recipients.[5, 6]

121 Checklists have an established role in healthcare to prevent omissions while  
122 performing complex procedures. A series of studies have shown that the use of a goal-  
123 directed checklist may help the systematic application of clinical guidelines, leading to  
124 greater adherence to evidence-based clinical interventions and improving clinical  
125 outcomes. Examples include the World Health Organisation (WHO) Surgical Safety  
126 Checklist, the Keystone Intensive Care Unit (ICU) Project checklist to prevent catheter-

1  
2  
3 127 related bloodstream infection, and clinical checklists to ensure patient safety in the  
4  
5 128 ICU.[7-10]  
6

7  
8 129 There is a lack of evidence for the use of checklists regarding the clinical  
9  
10 130 aspects of improving organ availability for transplantation of brain-dead donors. Some  
11  
12 131 observational studies have reported that the application of a goal-directed checklist to  
13  
14 132 guide the management of potential brain-dead organ donors may reduce the rate of  
15  
16 133 cardiac arrest and increase the number of organs recovered per donor. [11-18] However,  
17  
18 134 given the relatively small number of studies, their observational design and  
19  
20 135 inconsistency of findings, this literature cannot yet support the use of a goal-directed  
21  
22 136 checklist in the current management of brain-dead organ donors [19].  
23  
24  
25

26 137 Our hypothesis is that supporting the management of potential organ donors  
27  
28 138 with the use of an evidence-based bedside checklist may reduce the loss of potential  
29  
30 139 organ donors due to cardiac arrest and increase the number of donors and organs  
31  
32 140 transplanted per donor. In this protocol, we describe the methods to be used in the  
33  
34 141 Donation Network to Optimise Organ Recovery Study (DONORS).  
35  
36  
37  
38  
39

## 40 143 **OBJECTIVES**

### 41 42 144 **Primary objective**

43  
44 145 The primary objective is to evaluate the effectiveness of the implementation of  
45  
46 146 an evidence-based bedside checklist, containing goals and recommendations of care as  
47  
48 147 guidance for the management of potential organ donors, in reducing potential organ  
49  
50 148 donor losses due to cardiac arrest.  
51  
52  
53

54 149

### 55 56 150 **Secondary objectives**

1  
2  
3 151 Secondary objectives are to assess whether the evidence-based goal-directed checklist is  
4  
5 152 effective in (a) increasing the number of actual organ donors and (b) increasing the  
6  
7 153 number of organs recovered per actual donor.  
8  
9

10 154

## 11 155 **METHODS AND ANALYSIS**

12  
13  
14 156 The protocol is registered at ClinicalTrials.gov (NCT03179020) and the  
15  
16  
17 157 present manuscript provides additional details regarding study design and methodology.  
18

19 158

### 20 21 22 159 **Study design**

23  
24 160 DONORS is a parallel cluster randomised controlled trial involving ICUs of  
25  
26 161 Brazilian hospitals. We will randomly assign hospitals to the intervention group,  
27  
28 162 comprising the checklist implementation, or the control group, consisting of usual care  
29  
30 163 in each ICU (Figure 1).  
31

32 164

### 33 34 35 165 **Participants**

36  
37 166 Cluster eligibility, recruitment and exclusion criteria

38  
39  
40 167 We will invite adult ICUs with an average of at least 10 annual notifications of  
41  
42 168 potential organ donors in the prior two years. Information regarding notifications is  
43  
44 169 provided by the Brazilian National Transplant System.  
45

46  
47 170 Coronary care units, intermediate care units and emergency departments are not  
48  
49 171 eligible. We will also exclude institutions that already systematically use checklists as  
50  
51 172 guidance for the management of potential organ donors supported by implementation  
52  
53 173 tools, such as guidelines and clinical decision algorithms for bedside use, in print or  
54  
55 174 digital form.  
56

57  
58 175 Patient eligibility and exclusion criteria  
59  
60

1  
2  
3 176 We will screen and include consecutive potential organ donors, as confirmed  
4  
5 177 by the first clinical examination consistent with having brain death, within the age range  
6  
7 178 of 14 to 90 years. Only ICU patients will be included; potential donors outside the ICU  
8  
9 179 will be included in the study if admitted to ICU within three hours of initial assessment.  
10  
11

12 180 Diagnosis of brain death will be made according to the Brazilian Federal Board  
13  
14 181 of Medicine guidance, consisting of: two clinical examinations performed by two  
15  
16 182 different physicians and one apnoea test followed by neuro-imaging (transcranial  
17  
18 183 Doppler, cerebral arteriography, electroencephalography, or brain scintigraphy).[20, 21]  
19  
20 184 We will exclude brain-dead patients who are not candidates for organ donation (Online  
21  
22 185 Supplementary File 1).  
23  
24  
25

26 186

## 27 187 **Interventions**

### 28 188 Checklist for potential brain-dead donor management

29  
30 189 The intervention group checklist derives from a clinical practice guideline  
31  
32 190 (CPG) for potential organ donor management. The CPG recommendations were  
33  
34 191 developed from July 2016 to March 2017 as a joint initiative of the Brazilian Ministry  
35  
36 192 of Health, Brazilian Association of Intensive Care Medicine (AMIB), and Brazilian  
37  
38 193 Association of Organ Transplantation (ABTO).[22] The recommendations were  
39  
40 194 developed using the Grading of Recommendations, Assessment, Development and  
41  
42 195 Evaluation (GRADE) system.[23] The following criteria were considered in the  
43  
44 196 decision-making process: the risks and benefits of interventions; the quality of evidence  
45  
46 197 for risks and benefits; resource use and costs; and acceptability by healthcare  
47  
48 198 professionals.  
49  
50

51 199 We will provide on-site training in each ICU for healthcare professionals to  
52  
53 200 inform how to implement the checklist and how to apply the intended  
54  
55  
56  
57  
58  
59  
60

1  
2  
3 201 recommendations. The goals and recommendations involve temperature control,  
4  
5 202 mechanical ventilation, haemodynamic control, endocrine and metabolic control, and  
6  
7 203 use of antibiotics and blood products, as required. The full checklist is available in  
8  
9  
10 204 Online Supplementary File 2. Figure 2 describes the logic model for the intervention to  
11  
12 205 be tested in this study.

13  
14 206 The checklist application protocol will be activated at the time of potential  
15  
16 207 donor inclusion in the study and repeated every six hours until organ recovery or loss of  
17  
18 208 the potential donor. A member of the Intra-Hospital Transplant Co-ordination (IHTC)  
19  
20 209 or a designated ICU professional will apply the checklist. The same individual will be  
21  
22 210 responsible for prompting the medical team to modify medical management if any  
23  
24 211 inappropriate aspect of care is noted. Table 1 shows the strategies to promote effective  
25  
26 212 implementation of this intervention.  
27  
28  
29  
30  
31  
32  
33  
34  
35  
36  
37  
38  
39  
40  
41  
42  
43  
44  
45  
46  
47  
48  
49  
50  
51  
52  
53  
54  
55  
56  
57  
58  
59  
60

213 **Table 1.** Strategies to maximise adherence to study interventions and co-interventions.

---

**Strategies**

---

1. In-person training of two representatives (study co-ordinators) from each participating site on the conduct of family interviews.
  2. Provision of an online course for the training of all intensive care unit (ICU) team members and Intra-Hospital Transplant Co-ordination (IHTC) members on how to prepare for and conduct a family interview. A family interview support guide will also be made available.
  3. On-site training of ICU team members and IHTC members of all hospitals in the intervention group. The training aims to provide guidance on the methods for administration of the goal-directed checklist for the management of potential organ donors to as many ICU and IHTC professionals as possible.
  4. Production of monthly reports on the performance of each site in relation to patient inclusion and adherence to the checklist goals, grading adherence according to the percentage of goals achieved.
  5. The local co-ordinators of the participating sites will be contacted by the study central office co-ordinators whenever there is a failure to adhere to the protocol or to complete the patient's clinical record form.
  6. The local co-ordinators of the participating sites will receive, whenever a patient is included, electronic messages to remind them of the need to administer the bedside goal-directed checklist and prompt the medical team on management during the stay of potential organ donors in the ICU.
  7. Remote support from the study co-ordinators and central office will be made available to all local co-ordinators for any questions related to the study.
- 

214

215 Usual care

1  
2  
3 216 ICUs in the control group will continue with their usual management of  
4  
5 217 potential organ donors. They will not be informed of the items assessed in the goal-  
6  
7 218 directed checklist or the strategies to enhance compliance.  
8  
9

10 219

## 11 220 **Co-interventions**

12  
13  
14 221 All ICU teams and IHTC members of the participating institutions will receive  
15  
16 222 training in family interviews for organ donation. The training and interview process  
17  
18 223 have been based primarily on the Spanish model of Communication in Critical  
19  
20 224 Situations (Online Supplementary File 3).[23-27] Training consists of two components:  
21  
22 225 (1) face-to-face training of one ICU team representative and one IHTC member of each  
23  
24 226 institution; and (2) provision of an online, self-instructional course for all ICU team  
25  
26 227 members and IHTC members participating in the study (Table 1). These co-  
27  
28 228 interventions aim to standardise ICU strategies in relation to family interviews, reducing  
29  
30 229 variability between participating sites. This is important for the trial due to three main  
31  
32 230 reasons: (a) inadequate interviews may result in a lower rate of effective donation  
33  
34 231 (secondary outcomes of the study), independently of potential donor management; (b)  
35  
36 232 reducing variability between participating sites may have an impact on reducing the  
37  
38 233 intra-cluster correlation of the study, increasing its power; and (c) training strategies  
39  
40 234 might enhance the engagement of the participating sites, especially those in the control  
41  
42 235 group, thereby balancing a potential Hawthorne effect.  
43  
44  
45  
46  
47  
48

49 236

## 50 237 **Sample size**

51  
52 238 With 60 ICUs, we will need to include 19 potential organ donors per site  
53  
54 239 (1,140 potential donors) to detect an absolute reduction of donor losses due to cardiac  
55  
56 240 arrests of 10% (from 28% in the control group to 18% in the intervention group),[12]  
57  
58  
59  
60

1  
2  
3 241 considering an intra-class correlation coefficient (ICC) of 0.05, power of 80%, and a  
4  
5 242 two-sided alpha level of 5%. Therefore, considering a possible variation in cluster size  
6  
7 243 and its impact on statistical power, we intend to include a minimum of 60 ICUs with at  
8  
9 244 least 1,200 potential organ donors, not allowing more than 30 participants in each  
10  
11 245 cluster.  
12  
13  
14  
15 246

### 16 247 **Randomisation**

17  
18  
19 248 We will randomly assign ICUs to the intervention group or control group with  
20  
21 249 a 1:1 allocation ratio using blocks of variable sizes (2 and 4) and stratified by the  
22  
23 250 estimated annual number of notifications of brain death in each site (sites with  $\leq 29$  and  
24  
25 251  $> 29$ ). ICUs from the same institution are not considered independent clusters to avoid  
26  
27 252 contamination. We will randomise the ICUs consecutively as per the date of  
28  
29 253 authorisation of the principal investigator to implement the study in the institution,  
30  
31 254 obtained after the Institutional Review Board (IRB) approval. To ensure allocation  
32  
33 255 concealment, a statistician from the study co-ordinating office will be responsible for  
34  
35 256 the randomisation process, with all researchers involved in the trial blinded to the  
36  
37 257 allocation sequence.  
38  
39  
40  
41  
42 258

### 43 259 **Outcomes**

44  
45  
46 260 The primary outcome will be the number of potential organ donor losses due to  
47  
48 261 cardiac arrest, defined as any loss of potential donors for cardiac arrest that occurs after  
49  
50 262 patient enrolment, while the subject remains eligible for organ donation (no  
51  
52 263 contraindications, family approval or waiting family decision for donation). Losses of  
53  
54 264 potential donors due to other factors (e.g., family refusal or contraindication to organ  
55  
56 265 donation after patient inclusion) will not be considered for this outcome.  
57  
58  
59  
60



1  
2  
3 266 The secondary outcomes will be:  
4  
5 267 1) number of actual organ donors, defined as donors for whom the surgical  
6  
7 268 procedure for organ recovery has been initiated (irrespective of organ recovery);  
8  
9  
10 269 2) number of solid organs recovered per actual donor (ranging from zero to  
11  
12 270 seven organs per donor, as follows: liver; heart; pancreas; two lungs; and two kidneys).

14 271 The tertiary outcomes will include:

16  
17 272 1) the proportion of potential donors with adequate respiratory parameters  
18  
19 273 (defined as  $\text{PaO}_2 / \text{FiO}_2$  ratio  $\geq 200$ );  
20  
21 274 2) the proportion of potential donors with adequate body temperature (defined  
22  
23 275 as body temperature between  $34^\circ\text{C}$  and  $35^\circ\text{C}$  if haemodynamically stable and  $> 35^\circ\text{C}$  if  
24  
25 276 mean arterial pressure [MAP]  $< 65$  mm Hg or use of noradrenaline or dopamine);  
26  
27  
28 277 3) the proportion of potential donors with adequate circulatory parameters  
29  
30 278 (inadequate parameters defined as MAP  $< 65$  mm Hg or dose of noradrenaline  $\geq 0.1$   
31  
32 279 mc/kg/min or dose of dopamine  $\geq 15$  mcg/kg/min);  
33  
34  
35 280 4) organ dysfunction score, assessed by the Sequential Organ Failure  
36  
37 281 Assessment (SOFA) Score.

39  
40 282

### 42 283 **Blinding**

44 284 Due to the nature of the intervention, it will not be possible to blind  
45  
46 285 investigators or healthcare providers in this study. However, we will not disclose details  
47  
48 286 of the content of the checklist to the control group.

51 287

### 54 288 **Data collection**

56 289 An ICU healthcare professional or an IHTC member will collect the data,  
57  
58 290 which will be recorded at the patient's bedside using a printed case report form and  
59  
60

1  
2  
3 291 subsequently transferred into an electronic data capture system (REDCap, Vanderbilt  
4  
5 292 University, Tennessee, USA).[28] Investigators will receive training for these activities  
6  
7 293 during the study initiation meeting.  
8  
9

10 294

### 11 295 **Data monitoring**

12  
13  
14 296 The study statistician will be responsible for reviewing weekly data on all  
15  
16  
17 297 inclusions, checking data consistency, and checking whether all forms have been  
18  
19 298 completed correctly. Clinical research monitors will review all data collected and may  
20  
21 299 require supplementation or correction of inconsistent data according to the Good  
22  
23 300 Clinical Practices (GCP) recommended by the International Council for Harmonisation  
24  
25 301 (ICH).[29] On-site monitoring visits will take place after the fifth patient inclusion in  
26  
27 302 the site and when 100% of the projected number of inclusions for the site has been  
28  
29 303 achieved. Additional monitoring visits will be performed as needed, based on the  
30  
31 304 detection of data inconsistencies, errors in completing the forms, or suspected fraud.  
32  
33 305 Periodic remote follow-up will be performed via telephone or electronic messages with  
34  
35 306 the participating sites according to patient recruitment. The data to be collected from  
36  
37 307 each subject are summarised in Table 2.  
38  
39  
40  
41  
42  
43  
44  
45  
46  
47  
48  
49  
50  
51  
52  
53  
54  
55  
56  
57  
58  
59  
60

1  
2  
3 308 **Table 2.** Data to be entered in the clinical record form of all potential organ donors  
4  
5 309 included in the study.  
6

- 
1. Identification of the potential donor: research centre code and patient's hospital registration number, sex, and date of birth.
  2. Screening: inclusion and exclusion criteria for definition of eligibility.
  3. History: date and time of hospital admission, date and time of ICU admission, reported and estimated weight, height, SAPS 3 on ICU admission, comorbidities prior to hospitalisation, cause of brain death, date and time of 1<sup>st</sup> clinical examination for the diagnosis of brain death.
  4. Respiratory variables: tidal volume, mL; respiratory rate, mpm; PEEP, cm H<sub>2</sub>O; plateau pressure, cm H<sub>2</sub>O; peak pressure, cm H<sub>2</sub>O (if volume is controlled); FiO<sub>2</sub>, %  
Blood gas variables: PaO<sub>2</sub>, mm Hg; SaO<sub>2</sub>, %; PaCO<sub>2</sub>, mm Hg; base excess, mmol/dL; PvO<sub>2</sub>, mm Hg; SvO<sub>2</sub>, %; PvCO<sub>2</sub>, mm Hg; lactate, mmol/dL.
  5. Temperature and haemodynamic variables: temperature, °C; heart rate, bpm; systolic blood pressure, mm Hg; diastolic blood pressure, mm Hg; CVP, mm Hg and/or ΔPp, % and/or ΔSV, % and/or IVCCI, %; cardiac arrhythmias.
  6. Diuresis and fluid balance: infused volume; diuresis and fluid balance at different time intervals.
  7. Laboratory variables: haemoglobin, g/dL; creatinine, mg/dL; platelets, /mm<sup>3</sup>; bilirubin, mg/dL; sodium, mEq/L; potassium, mEq/L; magnesium, mEq/L; phosphorus, mEq/L; calcium, mEq/L.
  8. Drug use: noradrenaline; dopamine; vasopressin; desmopressin; corticosteroids; antibiotics.
  9. Family interview: time, place and name of the professional communicating the establishment of a brain death protocol to the family; time, place and name of the
-

---

professional communicating the death to the family; time, place and name of the professional conducting the family interview with the request for organ donation; experience and qualification of the professional conducting the family interview with the request for organ donation; family authorization for organ donation; loss of potential donor due to family refusal; causes of family refusal.

10. Protocol completion: date and time of 2<sup>nd</sup> clinical examination for the diagnosis of brain death; date and time of a complementary test for the diagnosis of brain death; complementary test performed for the diagnosis of brain death.
11. Occurrence of cardiac arrest, loss of potential donor due to cardiac arrest, completion of organ harvesting, number and type of organs recovered.

---

310 CVP, central venous pressure;  $\Delta Pp$ , pulse pressure respiratory variation;  $\Delta SV$ , stroke  
311 volume respiratory variation;  $FiO_2$ , fraction of inspired oxygen; ICU, intensive care  
312 unit;  $PaO_2$ , arterial partial pressure of oxygen;  $PaCO_2$ , arterial partial pressure of carbon  
313 dioxide;  $PvO_2$ , venous partial pressure of oxygen;  $PvCO_2$ , venous partial pressure of  
314 carbon dioxide; PEEP, positive end-expiratory pressure; SAPS 3, Simplified Acute  
315 Physiology Score 3;  $SaO_2$ , arterial oxygen saturation;  $SvO_2$ , venous oxygen saturation;  
316 IVCCI, inferior vena cava collapsibility index.  
317

### 318 **Statistical analysis**

319 We will prepare a detailed statistical analysis plan before data analysis, which  
320 is intended to be published or made available online. We will perform the statistical  
321 analysis following the intention-to-treat principle, accounting for cluster design, with  
322 observations of the ICUs analysed according to the group to which they have been  
323 allocated. We will examine the normality of data by visual inspection of histograms and  
324 using the Shapiro–Wilk test for normality. Baseline characteristics of both the ICUs and  
325 potential organ donors will be presented as frequencies and percentages, means and  
326 standard deviation (SD), and medians and interquartile range (IQR), whenever  
327 appropriate, for the intervention group and control group.

1  
2  
3 328 For the primary outcome, we will calculate hazard ratios (HR) considering the  
4  
5 329 time to the outcome, since patients will be subjected to management at different time  
6  
7 330 intervals in the institutions. Patients will be considered at risk for the occurrence of the  
8  
9 331 outcome of interest while under consideration as potential donors. If the outcome of  
10  
11 332 interest does not occur, patients' follow-up will be considered to have ended at the time  
12  
13 333 their management has been discontinued (family refusal or contraindication to  
14  
15 334 donation). We will conduct predefined subgroup analyses, considering the following  
16  
17 335 variables: age > 60 years; cause of the injury leading to potential brain death (traumatic  
18  
19 336 or non-traumatic); and patient severity on ICU admission defined by the Simplified  
20  
21 337 Acute Physiology Score 3 (SAPS 3) with a cut-off determined by its median. We will  
22  
23 338 conduct sensitivity analyses of adherence to the intervention and of the time interval  
24  
25 339 between the first clinical examination consistent with having brain death and inclusion  
26  
27 340 in the study.

28  
29  
30  
31  
32  
33 341 For secondary and tertiary outcomes, we will use models for correlated data,  
34  
35 342 considering the ICU as a cluster and each outcome with its own probability distribution.  
36  
37 343 We will conduct a sensitivity analysis of the outcome 'number of solid organs recovered  
38  
39 344 per actual donor', considering the number of kidneys harvested. We will analyse  
40  
41 345 secondary outcomes by adjusting for multiple hypothesis testing. For all statistical  
42  
43 346 comparisons, we will adopt a statistical significance level of 0.05. An up-to-date version  
44  
45 347 of the R programme (R Development Core Team) will be used to conduct analyses.  
46  
47  
48

49 348

#### 50 51 349 **Study planning and implementation schedule**

52  
53 350 We finalised the study design and protocol in March 2016. The National Study  
54  
55 351 Investigators Meetings were held in two parts: 9–10 March 2017 and 8–9 June 2017. At  
56  
57 352 the time of manuscript preparation, 63 ICUs representative of the Brazilian geopolitical  
58  
59  
60

1  
2  
3 353 territory are currently recruiting study subjects (Figure 3). On-site training started on  
4  
5 354 June 1, 2017. We expect that the recruitment will be completed in July 2019. The list of  
6  
7 355 sites included is available at ClinicalTrials.gov (NCT03179020).  
8  
9

10 356

### 11 357 **Organisational aspects of the study**

12  
13  
14 358 The study is sponsored and co-ordinated by the Moinhos de Vento Hospital,  
15  
16 359 Brazil, in partnership with the Brazilian Ministry of Health through the Programme of  
17  
18 360 Institutional Development of the Brazilian Unified Health System (PROADI-SUS) and  
19  
20 361 in association with the General Co-ordination Office of the National Transplant System  
21  
22 362 (CGSNT) and the Brazilian Research in Intensive Care Network (BRICNet). The study  
23  
24 363 is supported by the AMIB Committee for Organ Donation for Transplant, ABTO, the  
25  
26 364 Spanish National Transplant Organisation (ONT), and the organ procurement  
27  
28 365 organisations (OPOs) of the states of Santa Catarina and Rio Grande do Sul. The study  
29  
30 366 Steering Committee consists of intensivists, transplant co-ordinators and  
31  
32 367 epidemiologists with expertise in conducting multi-centre studies. The committee is  
33  
34 368 involved in the conception and design of the study, supervision of progress and  
35  
36 369 procedures during the study, and writing of the study report and any resulting study  
37  
38 370 manuscript.  
39  
40  
41  
42  
43  
44  
45

46 371

### 47 372 **Ethics and dissemination**

48  
49 373 The study was designed in accordance with resolution No. 466/2012 of the  
50  
51 374 Brazilian National Health Council/Ministry of Health, the Declaration of Helsinki, the  
52  
53 375 Document of the Americas, and the ICH/GCP E6(R2) 2016. The study was approved by  
54  
55 376 the IRB of the Co-ordinating Centre (No. 53999616.0.1001.5330) and by the IRB of  
56  
57 377 each participating hospital. Participating in the intervention or control groups does not  
58  
59  
60

1  
2  
3 378 imply any risk for the subjects included, since the groups will not be deprived of the  
4  
5 379 application of the most up-to-date recommendations. Because obtaining written  
6  
7 380 informed consent from patients' family members entails operational and methodological  
8  
9 381 difficulties, and would have a potential negative impact on organ donation as well, we  
10  
11 382 will request a waiver of informed consent in accordance with the IRB of each site.  
12  
13

14 383 This trial, regardless of the results, will be published in a peer-reviewed  
15  
16 384 medical journal and presented in scientific conferences and scientific meetings  
17  
18 385 involving the representatives of each participating hospital, of each Brazilian state  
19  
20 386 transplant centre, and of the Brazilian Ministry of Health.  
21  
22

23  
24 387

## 25 388 **DISCUSSION**

26  
27 389 Despite the existence of CPGs that currently provide recommendations for a  
28  
29 390 'standard of care' in the management of potential organ donors,[22,28] they are not  
30  
31 391 always implemented, resulting in the risk of loss of specific organs due to management  
32  
33 392 failures or even multiple organ loss due to cardiac arrest of the potential donor.[1-4, 22,  
34  
35 393 30] CPGs usually do not have an impact on bedside practice in the short term, as they  
36  
37 394 rarely take into account clinical applicability.[31] Therefore, a CPG-based goal-directed  
38  
39 395 checklist associated with a clinician prompting system may be an effective approach to  
40  
41 396 improve physician adherence to CPG recommendations. Physician-centred healthcare  
42  
43 397 can be associated with non-adherence to basic recommendations of care, especially in  
44  
45 398 highly complex processes, such as the management of potential organ donors.[30] In  
46  
47 399 this context, we expect that these organisational adjustments, supported by a checklist-  
48  
49 400 based management strategy, will have a positive impact on organ donation.  
50  
51

52  
53 401 Patel et al.[18] published the results of 671 multi-organ donors managed using  
54  
55 402 a goal-directed checklist in the United States. The predetermined goals were met in 45%  
56  
57  
58  
59  
60

1  
2  
3 403 of cases prior to organ recovery, and the use of the goal-directed checklist significantly  
4  
5 404 increased the number of organs transplanted per donor.[18] Recently, we published a  
6  
7 405 prospective observational study that involved 27 ICUs in a southern Brazilian state  
8  
9 406 demonstrating that the use of a goal-directed checklist to guide the management of  
10  
11 407 deceased donors reduces potential brain-dead donor losses due to cardiac arrest.[12]  
12  
13 408 Compliance with the checklist increased after the start of the study from 52.1% to  
14  
15 409 85.8% ( $p < 0.001$ ). The use of the checklist was associated with a lower likelihood of  
16  
17 410 occurrence of cardiac arrest (odds ratio [OR]: 0.30, 95% CI: 0.18-0.49,  $p < 0.001$ ) and  
18  
19 411 an increase in the number of organs recovered per donor.[12] Although these results are  
20  
21 412 encouraging and reproduce the observations of other authors, the observational nature of  
22  
23 413 the studies provides only weak evidence on the subject.[13-18]

24  
25  
26  
27  
28 414 The study design and basis for the implementation of DONORS may provide  
29  
30 415 new insights that can help overcome the weaknesses of previous observational studies.  
31  
32 416 The cluster randomisation design will limit selection biases, and we will count on a  
33  
34 417 large number of ICUs, which are responsible for a significant amount of brain death  
35  
36 418 notifications throughout Brazil. The DONORS design will include the evaluation of the  
37  
38 419 effectiveness of a goal-directed checklist strategy in different socioeconomic scenarios  
39  
40 420 in Brazil, allowing us to provide real-world evidence to support the practical clinical  
41  
42 421 applicability of the study findings. Finally, the characteristics of the institutional quality  
43  
44 422 improvement programme of this protocol will allow the potential benefits generated by  
45  
46 423 the proposed study model to be incorporated into ICUs and ultimately transferred to  
47  
48 424 other clinical areas for the care of critically ill patients.

49  
50  
51 425 The implementation of a goal-directed checklist for the management of  
52  
53 426 potential donors is a complex intervention, with multiple components. It is important to  
54  
55 427 state that, as in most quality improvement studies, how the intervention is implemented  
56  
57  
58  
59  
60



1  
2  
3 428 is crucial to the interpretation of the results. In this respect, through this protocol, we  
4  
5 429 aimed to describe in detail all the interventions and co-interventions proposed in the  
6  
7 430 study in order to allow reproducibility of our procedures in other settings. In addition,  
8  
9 431 the logic model presented in the study (Figure 2) is intended to explore the relationships  
10  
11 432 between the activities proposed in the intervention and the mediators of the effect, such  
12  
13 433 as improved clinical management of potential donors and enhanced communication  
14  
15 434 with the ICU team about the expected outcomes. Also important is that, although the  
16  
17 435 study focuses on assessing short-term outcomes in potential donors (e.g., cardiac arrest  
18  
19 436 and number of organs recovered), potential beneficial outcomes are expected for  
20  
21 437 transplant recipients, such as improved graft function, survival and quality of life.  
22  
23  
24

25  
26 438 Our study has some limitations. First, high variability in care and outcomes  
27  
28 439 among institutions is expected. Although the chosen ICC may be considered  
29  
30 440 conservative, there are no estimates in the literature for the proposed intervention, which  
31  
32 441 may result in lack of power if the actual ICC is larger than the estimate. In spite of the  
33  
34 442 procedures to avoid the transfer of information about the checklist to ICUs in the  
35  
36 443 control group, although with low probability this possibility should be considered,  
37  
38 444 thereby exposing the details of the content of the goal-directed checklist for the control  
39  
40 445 group. Furthermore, although stratified randomisation is planned for this study, we must  
41  
42 446 take into consideration the differences in the number of brain death notifications among  
43  
44 447 ICUs, which will recruit patients at different rates, which in turn may generate learning  
45  
46 448 curves that may have an impact on the final cluster randomisation trial results. In order  
47  
48 449 to minimise this problem, we are allowing a maximum of 30 patients to be recruited per  
49  
50 450 each study site; however, some ICUs may recruit a small number of patients. In  
51  
52 451 addition, the trial is testing the effectiveness of the proposed intervention by means of  
53  
54 452 an implementation strategy that may be considered feasible to replicate in other settings.  
55  
56  
57  
58  
59  
60

1  
2  
3 453 Inadequate adherence to the checklist may have an impact on the results observed in the  
4  
5 454 intervention group, showing no effect that may be either due to lack of efficacy of the  
6  
7 455 intervention or due to its suboptimal implementation. Another important aspect to  
8  
9 456 highlight is that, although we expect to see an improvement in the quality of organs  
10  
11 457 with the use of the checklist, therefore improving outcomes for organ-transplant  
12  
13 458 recipients, we are limiting the data collection and study procedures to potential donors,  
14  
15 459 not allowing direct assumptions about its possible effects.  
16  
17  
18  
19  
20

460

## 461 **CONCLUSIONS**

462 We expect that the results from DONORS will provide information regarding  
463 the practical use of checklist-guided management interventions for potential multi-organ  
464 donors that may contribute to reducing potential donor losses due to cardiac arrest or  
465 other relevant outcomes. At this time, with the increasing demand for organs for  
466 transplantation, standardised, evidence-based guidelines that may be adopted globally  
467 by ICUs and by transplant co-ordinators are needed to improve the availability and  
468 quality of organs available for donation. The evidence generated by this trial will have  
469 great potential to contribute positively to the donation of organs.  
47  
48  
49  
50  
51  
52  
53  
54  
55  
56  
57  
58  
59  
60

470 **REFERENCES**

- 471 1. The Madrid resolution on organ donation and transplantation: national responsibility  
472 in meeting the needs of patients, guided by the WHO principles. *Transplantation*  
473 2011;91 Suppl 11:S29-31. doi: 10.1097/01.tp.0000399131.74618.a5
- 474 2. Tullius SG, Rabb H. Improving the Supply and Quality of Deceased-Donor Organs  
475 for Transplantation. *N Engl J Med* 2018;378:1920-9. doi: 10.1056/NEJMra1507080
- 476 3. Dominguez-Gil B, Delmonico FL, Shaheen FA, et al. The critical pathway for  
477 deceased donation: reportable uniformity in the approach to deceased donation. *Transpl*  
478 *Int* 2011;24:373-8. doi: 10.1111/j.1432-2277.2011.01243.x
- 479 4. DuBose J, Salim A. Aggressive organ donor management protocol. *J Intensive Care*  
480 *Med* 2008;23:367-75. doi: 10.1177/0885066608324208
- 481 5. Mascia L, Pasero D, Slutsky AS, et al. Effect of a lung protective strategy for organ  
482 donors on eligibility and availability of lungs for transplantation: a randomized  
483 controlled trial. *JAMA* 2010;304:2620-7. doi: 10.1001/jama.2010.1796
- 484 6. Niemann CU, Feiner J, Swain S, et al. Therapeutic Hypothermia in Deceased Organ  
485 Donors and Kidney-Graft Function. *N Engl J Med* 2015;373:405-14. doi:  
486 10.1056/NEJMoa1501969
- 487 7. Haynes AB, Weiser TG, Berry WR, et al. A surgical safety checklist to reduce  
488 morbidity and mortality in a global population. *N Engl J Med* 2009;360:491-9. doi:  
489 10.1056/NEJMs0810119
- 490 8. Pronovost P, Needham D, Berenholtz S, et al. An intervention to decrease catheter-  
491 related bloodstream infections in the ICU. *N Engl J Med* 2006;355:2725-32. doi:  
492 10.1056/NEJMoa061115

- 1  
2  
3 493 9. Weiss CH, Moazed F, McEvoy CA, et al. Prompting physicians to address a daily  
4  
5 494 checklist and process of care and clinical outcomes: a single-site study. *Am J Respir*  
6  
7 495 *Crit Care Med* 2011;184:680-6. doi: 10.1164/rccm.201101-0037OC  
8  
9  
10 496 10. Writing Group for the Checklist-ICU and the Brazilian Research in Intensive Care  
11  
12 497 Network. Effect of a Quality Improvement Intervention With Daily Round Checklists,  
13  
14 498 Goal Setting, and Clinician Prompting on Mortality of Critically Ill Patients: A  
15  
16 499 Randomized Clinical Trial. *JAMA* 2016;315:1480-90. doi: 10.1001/jama.2016.3463  
17  
18  
19 500 11. Westphal GA, Zacliffe VR, Vieira KD, et al. A managed protocol for treatment of  
20  
21 501 deceased potential donors reduces the incidence of cardiac arrest before organ explant.  
22  
23 502 *Rev Bras Ter Intensiva* 2012;24:334-40. doi: 10.1590/S0103-507X2012000400007  
24  
25  
26 503 12. Westphal GA, Coll E, de Souza RL, et al. Positive impact of a clinical goal-directed  
27  
28 504 protocol on reducing cardiac arrests during potential brain-dead donor maintenance.  
29  
30 505 *Crit Care* 2016;20:323. doi: 10.1186/s13054-016-1484-1  
31  
32  
33 506 13. Helms AK, Torbey MT, Haccin-Bey L, et al. Standardized protocols increase organ  
34  
35 507 and tissue donation rates in the neurocritical care unit. *Neurology* 2004;63:1955-7. doi:  
36  
37 508 10.1212/01.WNL.0000144197.06562.24  
38  
39  
40 509 14. Franklin GA, Santos AP, Smith JW, et al. Optimization of donor management goals  
41  
42 510 yields increased organ use. *Am Surg* 2010;76:587-94.  
43  
44  
45 511 15. Malinoski DJ, Daly MC, Patel MS, et al. Achieving donor management goals before  
46  
47 512 deceased donor procurement is associated with more organs transplanted per donor. *J*  
48  
49 513 *Trauma* 2011;71:990-5; discussion 6. doi: 10.1097/TA.0b013e31822779e5  
50  
51  
52 514 16. Salim A, Velmahos GC, Brown C, et al. Aggressive organ donor management  
53  
54 515 significantly increases the number of organs available for transplantation. *J Trauma*  
55  
56 516 2005;58:991-4. doi: 10.1097/01.TA.0000168708.78049.32  
57  
58  
59  
60

- 1  
2  
3 517 17. Malinoski DJ, Patel MS, Daly MC, et al. The impact of meeting donor management  
4  
5 518 goals on the number of organs transplanted per donor: results from the United Network  
6  
7 519 for Organ Sharing Region 5 prospective donor management goals study. *Crit Care Med*  
8  
9 520 2012;40:2773-80. doi: 10.1097/CCM.0b013e31825b252a  
11  
12 521 18. Patel MS, Zatarain J, De La Cruz S, et al. The impact of meeting donor management  
13  
14 522 goals on the number of organs transplanted per expanded criteria donor: a prospective  
15  
16 523 study from the UNOS Region 5 Donor Management Goals Workgroup. *JAMA Surg*  
17  
18 524 2014;149:969-75. doi: 10.1001/jamasurg.2014.967  
19  
20 525 19. Chan AW, Tetzlaff JM, Altman DG, et al. SPIRIT 2013 statement: defining  
21  
22 526 standard protocol items for clinical trials. *Ann Intern Med* 2013;158:200-7. doi:  
23  
24 527 10.7326/0003-4819-158-3-201302050-00583  
25  
26 528 20. Wijdicks EF, Varelas PN, Gronseth GS, et al. Evidence-based guideline update:  
27  
28 529 determining brain death in adults: report of the Quality Standards Subcommittee of the  
29  
30 530 American Academy of Neurology. *Neurology* 2010;74:1911-8. doi:  
31  
32 531 10.1212/WNL.0b013e3181e242a8  
33  
34 532 21. Brasil. Conselho Federal de Medicina. Resolução CFM 2.173, 15/12/2017  
35  
36 533 [Internet]. [cited 2018 Jul 24]. Available from:  
37  
38 534 <http://www.saude.rs.gov.br/upload/arquivos/carga20171205/19140504-resolucao-do->  
39  
40 535 [conselho-federal-de-medicina-2173-2017.pdf](http://www.saude.rs.gov.br/upload/arquivos/carga20171205/19140504-resolucao-do-conselho-federal-de-medicina-2173-2017.pdf).  
41  
42 536 22. Westphal GA, Caldeira Filho M, Fiorelli A, et al. Guidelines for maintenance of  
43  
44 537 adult patients with brain death and potential for multiple organ donations: the Task  
45  
46 538 Force of the Brazilian Association of Intensive Medicine the Brazilian Association of  
47  
48 539 Organs Transplantation, and the Transplantation Center of Santa Catarina. *Transplant*  
49  
50 540 *Proc* 2012;44:2260-7. doi: 10.1016/j.transproceed.2012.07.019  
51  
52  
53  
54  
55  
56  
57  
58  
59  
60

- 1  
2  
3 541 23. Rech TH, Rodrigues Filho EM. [Family approach and consent for organ donation].  
4  
5 542 *Rev Bras Ter Intensiva* 2007;19:85-9. doi: 10.1590/S0103-507X2007000100011  
6  
7 543 24. Vincent A, Logan L. Consent for organ donation. *Br J Anaesth* 2012;108 Suppl  
8  
9 544 1:i80-7. doi: 10.1093/bja/aer353  
10  
11 545 25. Gobierno de España. Organización Nacional de Trasplantes. Comunicación en  
12  
13 546 situaciones críticas [Internet]. [cited 2018 Jul 24]. Available from:  
14  
15 547 [http://agora.ceem.org.es/wp-](http://agora.ceem.org.es/wp-content/uploads/documentos/bioetica/comunicacionensituacionescriticasONT.pdf)  
16  
17 548 [content/uploads/documentos/bioetica/comunicacionensituacionescriticasONT.pdf](http://agora.ceem.org.es/wp-content/uploads/documentos/bioetica/comunicacionensituacionescriticasONT.pdf).  
18  
19 549 26. Lautrette A, Darmon M, Megarbane B, et al. A communication strategy and  
20  
21 550 brochure for relatives of patients dying in the ICU. *N Engl J Med* 2007;356:469-78. doi:  
22  
23 551 10.1056/NEJMoa063446  
24  
25 552 27. Curtis JR, Patrick DL, Shannon SE, et al. The family conference as a focus to  
26  
27 553 improve communication about end-of-life care in the intensive care unit: opportunities  
28  
29 554 for improvement. *Crit Care Med* 2001;29:N26-33.  
30  
31 555 28. Harris PA, Taylor R, Thielke R, et al. Research electronic data capture (REDCap)--a  
32  
33 556 metadata-driven methodology and workflow process for providing translational research  
34  
35 557 informatics support. *J Biomed Inform* 2009;42:377-81. doi: 10.1016/j.jbi.2008.08.010  
36  
37 558 29. International conference on harmonisation of technical requirements for registration  
38  
39 559 of pharmaceuticals for human use. ICH Harmonised Tripartite Guideline. Guideline for  
40  
41 560 good clinical practice. E6(R1) [Internet]. [cited 2018 Nov 12]. Available from:  
42  
43 561 [https://www.ich.org/fileadmin/Public\\_Web\\_Site/ICH\\_Products/Guidelines/Efficacy/E6/](https://www.ich.org/fileadmin/Public_Web_Site/ICH_Products/Guidelines/Efficacy/E6/E6_R1_Guideline.pdf)  
44  
45 562 [E6\\_R1\\_Guideline.pdf](https://www.ich.org/fileadmin/Public_Web_Site/ICH_Products/Guidelines/Efficacy/E6/E6_R1_Guideline.pdf)  
46  
47 563 30. Cabana MD, Rand CS, Powe NR, et al. Why don't physicians follow clinical  
48  
49 564 practice guidelines? A framework for improvement. *JAMA* 1999;282:1458-65. doi:  
50  
51 565 10.1001/jama.282.15.1458  
52  
53  
54  
55  
56  
57  
58  
59  
60

1  
2  
3  
4  
5  
6  
7  
8  
9  
10  
11  
12  
13  
14  
15  
16  
17  
18  
19  
20  
21  
22  
23  
24  
25  
26  
27  
28  
29  
30  
31  
32  
33  
34  
35  
36  
37  
38  
39  
40  
41  
42  
43  
44  
45  
46  
47  
48  
49  
50  
51  
52  
53  
54  
55  
56  
57  
58  
59  
60

566 31. Shemie SD, Ross H, Pagliarello J, et al. Organ donor management in Canada:  
567 recommendations of the forum on Medical Management to Optimize Donor Organ  
568 Potential. *CMAJ* 2006;174:S13-32. doi: 10.1503/cmaj.045131

For peer review only

1  
2  
3 569 **Authors' contributions**  
4

5 570 All authors contributed to the study design and revised this manuscript: GAW, CCR,  
6  
7 571 ABC, FRM, RGR, CT, JA, CAF, LCPA, FAB, CMG, DBS, DS, DZP, ICM, AIR, SSS,  
8  
9 572 NEG, LVA, PSB, FRR, MFRBM, TBP, CMCG, PCD, JFPO, GCM, FACA, RBM, VN,  
10  
11 573 LSH, MOM, RRN, and MF. Additionally, GAW, FRM, and ABC conceived the study,  
12  
13 574 RGR, CT, LCPA, FAB, LSH, and MF also helped with the study design, and GAW  
14  
15 575 drafted the first version of the article. JA, CAF, and RRN, helped with centre  
16  
17 576 recruitment and with the co-intervention aspects. GAW, JA, CMG and DBS co-  
18  
19 577 ordinated educational actions for the intervention. NEG, DS, MF, RGR, CCR, and ABC  
20  
21 578 planned epidemiological and statistical aspects of the study, CMG, ICM, and DZP  
22  
23 579 designed the study manuals and study tools, ICM and CMG led site management, ICM,  
24  
25 580 LAV, CMG, AIR, and SSS visited all sites to provide training, and CCR, ICM, CMG,  
26  
27 581 PSB, and DZP organized the study meetings. All authors read and approved the final  
28  
29 582 manuscript.  
30  
31  
32  
33  
34

35 583

36  
37 584 **Funding statement:** This research was funded by the Brazilian Ministry of Health  
38  
39 585 through the Programme of Institutional Development of the Brazilian Unified Health  
40  
41 586 System (PROADI-SUS).  
42  
43  
44

45 587

46 588 **Competing interests statement:** The authors have no conflicts of interest to disclose.  
47  
48

49 589

50  
51 590 **Data sharing**  
52

53 591 The datasets used and/or analysed during the current study will be available from the  
54  
55 592 corresponding author on reasonable request.  
56  
57  
58  
59  
60



1  
2  
3 593 **Acknowledgements:** The authors would like to thank the data collection team of each  
4  
5 594 participating ICU, as well as the Moinhos de Vento Hospital (the Co-ordinating Centre),  
6  
7 595 the Brazilian Ministry of Health, the Brazilian Research in Intensive Care Network  
8  
9 596 (BRICNet), the General Co-ordination Office of the National Transplant System  
10  
11 597 (CGSNT), the Committee for Organ Donation for Transplant of the Brazilian  
12  
13 598 Association of Intensive Care Medicine (AMIB), the Brazilian Association of Organ  
14  
15 599 Transplantation (ABTO) for their support in conducting the study, and the professionals  
16  
17 600 who provided the training in family interviews for organ donation: Aline Ghellere,  
18  
19 601 Charlene Verusa da Silva, Dagoberto Franca da Rocha, Eduardo Jardim Berbigier,  
20  
21 602 Edvaldo Leal de Moraes, Felipe Pfuetzenreiter, Leonardo Borges de Barros e Silva,  
22  
23 603 Luana Cristina Heberle dos Santos, Lucia Maria Del Carmen Segovia Gomes, Neide da  
24  
25 604 Silva Knihs, and Paulo Ricardo Cardoso.  
26  
27  
28  
29  
30  
31  
32  
33  
34  
35  
36  
37  
38  
39  
40  
41  
42  
43  
44  
45  
46  
47  
48  
49  
50  
51  
52  
53  
54  
55  
56  
57  
58  
59  
60

1  
2  
3 605 **FIGURE LEGENDS**  
4

5 606 **Figure 1.** Study flow diagram.  
6

7 607 ICUs, intensive care units; IRB, Institutional Review Board; ITT, intention-to-treat;  
8

9  
10 608 No., number  
11

12 609 **Figure 2.** Logic model for the checklist intervention.  
13

14 610 **Figure 3.** Geographical distribution of the participating intensive care units in Brazil.  
15  
16  
17  
18  
19  
20  
21  
22  
23  
24  
25  
26  
27  
28  
29  
30  
31  
32  
33  
34  
35  
36  
37  
38  
39  
40  
41  
42  
43  
44  
45  
46  
47  
48  
49  
50  
51  
52  
53  
54  
55  
56  
57  
58  
59  
60

1  
2  
3 611 \* **DONORS (Donation Network for Organ Recovery Study) Investigators and the**  
4  
5 612 **BRICNet collaborators:** Jose Luis Toribio Cuadra, Caroline Luciane de Oliveira,  
6  
7 613 Gabriela Rech and Bruna dos Passos Gimenes. Hospital de Urgência e Emergência de  
8  
9 614 Rio Branco (AC): Iris de Lima Ferraz Siqueira, Aldo Damian Chambi Garrido, Gigliane  
10  
11 615 Maria Angelim de Albuquerque, and Régis Augusto Hashimoto. Hospital das Clínicas  
12  
13 616 de Rio Branco (AC): Mateus Roza Teles, Rosely Barreiros Cruz, and Nelson Antônio  
14  
15 617 Carneiro Pinheiro Júnior. Hospital Geral Prof. Osvaldo Brandão Vilela (AL): Janaína  
16  
17 618 Maria Miranda Ferreira de Moraes, Claudete Maria Balzan, Lúcia Regina Arana Leite,  
18  
19 619 and Lis Daniela Pinto Oliveira. Hospital de Pronto Socorro João Paulo II (RO):  
20  
21 620 Thattayne Borba Pereira, Edwin Fanola Novillo, Maxwendell Gomes Batista, and  
22  
23 621 Silvecler Cortijo de Campos. Hospital de Pronto Socorro Dr. João Lúcio Pereira  
24  
25 622 Machado (AM): Marcelo Souza Ferreira, Helen Figueiredo, Nathalia Cristina Moraes,  
26  
27 623 and Paulo Henrique Lira Matos. Hospital de Urgência de Sergipe (SE): Janaína Feijó,  
28  
29 624 Dernivania de Andrade Ferreira, Ana Paula Rocha Barrel Machado, and Poliana Nunes  
30  
31 625 Santos. Hospital Geral Cleriston Andrade (BA): Lúcio Couto de Oliveira Júnior, Felipe  
32  
33 626 Ferreira Ribeiro de Souza, Daniela Cunha de Oliveira, and Graças de Maria Dias Reis.  
34  
35 627 Hospital Instituto Dr. José Frota (CE): Ana Virgínia Rolim, Lisiane Paiva Alencar,  
36  
37 628 Samira Rocha Magalhães, and Eliana Regia Barbosa de Almeida. Hospital Geral de  
38  
39 629 Fortaleza (CE): Joel Isidoro Costa, Larissa Salles Pontes Carneiro, and Márcia Maria  
40  
41 630 Vitorino Sampaio Passos. Hospital Regional do Cariri (CE): Gustavo Martins dos  
42  
43 631 Santos, José Wagner Brito de Souza, and Bruna Bandeira Oliveira Marinho. Irmandade  
44  
45 632 Santa Casa de Misericórdia de Sobral (CE): Luiz Derwal Salles Júnior, José Henrique  
46  
47 633 Gurgel, Iranildo Passos Fontenele, and Layanny Teles Linhares Bezerra. Hospital  
48  
49 634 Regional Norte (CE): Francisco Olon Leite Júnior, Israel Ferreira da Costa, Diego  
50  
51 635 Bruno Santos Pinheiro, and Denise Martins de Moura. Hospital Regional Tarcísio de  
52  
53  
54  
55  
56  
57  
58  
59  
60

- 1  
2  
3 636 Vasconcelos Maia (RN): Fernando Albuerne Bezerra, Suzana Cantidio, Jéssica Patrícia  
4  
5 637 Saraiva Medeiros Lima Moreira, and Bruna de Sousa Carvalho. Hospital Alberto  
6  
7 638 Urquiza Wanderley (PB): Ciro Leite Mendes, Igor Mendonça do Nascimento, and  
8  
9 639 Juliana Sousa Dias. Hospital Municipal Djalma Marques (MA): Alexandre Augusto  
10  
11 640 Gomes Alves, Heloisa Rosário Furtado Oliveira Lima, Silvia Helena Cardoso de Araújo  
12  
13 641 Carvalho, and Clayton Aragão Magalhães. Hospital Dr. Carlos Macieira (MA): Marko  
14  
15 642 Antônio Santos, Luiza Maria de Novoa Moraes, Lea Barroso Coutinho Pereira, and  
16  
17 643 Henrique Lott Carvalho Novaes Sobrinho. Hospital da Restauração (PE): Maria de  
18  
19 644 Fátima Rodrigues Buarque de Melo, Sylvia Helena Araújo Lima Siqueira, and Janaína  
20  
21 645 Rodrigues da Silva. Hospital de Ensino Doutor Washington Antônio de Barros (PE):  
22  
23 646 Pedro Carvalho Diniz, Samyra Pereira de Moraes, Janaína Correia Walfredo Carvalho,  
24  
25 647 and Kátia Regina de Oliveira. Hospital de Base do Distrito Federal (DF): Luiz Hamilton  
26  
27 648 da Silva, Daniela Ferreira Salomão Pontes, Viviane Marçal da Silva, and Camila Vieira  
28  
29 649 Hirata. Hospital Estadual de Urgência e Emergência de Vitória (ES): Jander Pissinate  
30  
31 650 Fornaciari, Ana Paula Neves Curty, Ivens Guimarães Soares, and Leandro de Oliveira  
32  
33 651 Ferreira. Hospital de Urgência de Goiânia (GO): Alexandre Amaral, Guilherme Ono de  
34  
35 652 Gouvêa, and Ana Paula Cordeiro de Menezes Silveira. Hospital João XXIII (MG):  
36  
37 653 Frederico Bruzzi de Carvalho, Natasha Preis Ferreira, Sylmara Jenifer Zandona Freitas,  
38  
39 654 Fernanda Coura Pena de Sousa, and Chen Laura. Hospital das Clínicas da Universidade  
40  
41 655 Federal de Minas Gerais (MG): Vandack Alencar Nobre, Christiane de Freitas Morrão  
42  
43 656 Helt Mantuano Pereira, and Amélia Cristina Gomes. Hospital Universitário Ciências  
44  
45 657 Médicas (MG): Jeova Ferreira de Oliveira, Marcela Leandro Baldow, and Rodrigo  
46  
47 658 Santana Dutra. Irmandade Santa Casa de Misericórdia de Belo Horizonte (MG): Mara  
48  
49 659 Rubia de Moura, Claudio Dornas de Oliveira, Andressa Siuves Moreira, and Marina  
50  
51 660 Ferreira de Oliveira. Santa Casa de Campo Grande (MS): Patrícia Berg Gonçalves  
52  
53  
54  
55  
56  
57  
58  
59  
60

- 1  
2  
3 661 Pereira Leal, Ana Paula Silva das Neves, Rodrigo Correa Gomes da Silva, and Márcia  
4  
5 662 Heloisa Flores. Hospital Municipal Padre Germano Lauck (PR): Roberto de Almeida,  
6  
7 663 Karin Aline Zili Couto, Aleksandro José dos Santos Fernandes, and Carla Fabíola  
8  
9 664 Carvalho. Hospital Evangélico de Londrina (PR): Cintia Magalhães Carvalho Grion,  
10  
11 665 Elizabeth Regina de Jesus Capelo Frois, Ana Luiza Mezaroba, and Josiane Festti.  
12  
13 666 Hospital Universitário Regional dos Campos Gerais (PR): Thomas Markus Dhaese,  
14  
15 667 Simone Macedo Hanke, and Guilherme Arcaro. Hospital Bom Jesus de Ponta Grossa  
16  
17 668 (PR): Maikel Ramthun, Jullye Christine Pereira Tomacheski, César Flores, and Patrícia  
18  
19 669 Bertoncini Cwiertnia. Hospital Universitário de Cascavel do Oeste do Paraná (PR):  
20  
21 670 Péricles Duarte, Elaine Fátima Padilha, Cleber Tchaicka, and Lizandra de Oliveira  
22  
23 671 Ayres. Hospital Universitário Regional do Norte do Paraná (PR): Cintia Magalhães  
24  
25 672 Carvalho Grion, Sheila Esteves Farias, Marcos Toshiyuki Tanita, and Lucienne Tibery  
26  
27 673 Queiroz Cardoso. Hospital Universitário de Maringá (PR): Almir Germano, Catia  
28  
29 674 Milene Dell’Agnolo, and Rosane Almeida de Freitas. Irmandade Santa Casa de  
30  
31 675 Misericórdia de Maringá (PR): Ellen Sotti Barbosa, Vanessa Martim Mezzavila, and  
32  
33 676 Pedro Rigon Junior. Hospital Bom Jesus de Toledo (PR): Fernando Roberto Roman,  
34  
35 677 Itamar Weiwanko, Cristiano Morginski, and Waldir Antonio Pasa Junior. Hospital  
36  
37 678 Nossa Senhora do Rocio de Campo Largo (PR): Ricardo Gustavo Zill Risson, Fernanda  
38  
39 679 Gabriella Barbosa Santos, and Mayara Ferreira Vieira. Hospital e Maternidade Angelina  
40  
41 680 Caron (PR): Tatiana Euclides Cassolli, Mariana Pramio Singer, Rosiane de Oliveira  
42  
43 681 Pereira, and Jaciara Ribeiro de Oliveira. Hospital Santa Rita de Maringá (PR): Melina  
44  
45 682 Almeida Slemmer Lemos, Vivianne Cristina Boaretto Toniol, and Mariza Aparecida de  
46  
47 683 Souza. Hospital Norte Paranaense (PR): Ângelo Yassushi Hayashi, Priscila Lisane de  
48  
49 684 Lima de Paula, and Elza de Lara Bezerra. Hospital São Vicente de Paulo Guarapuava  
50  
51 685 (PR): Fernanda Grossmann Ziger Borges, Elaine Silva Ramos, Cibele Aparecida  
52  
53  
54  
55  
56  
57  
58  
59  
60

1  
2  
3 686 Marochi, and Jessyca Braga. Hospital Geral de Nova Iguaçu (PR): Alexander de  
4  
5 687 Oliveira Sodré, Leticia Alves Pereira Entrago, Thiago Matos Barcelos, and Roberta  
6  
7 688 Carvalho de Jesus. Hospital Estadual Getúlio Vargas (RJ): Vitor Montez, Mônica  
8  
9 689 Silvina França da Silva de Melo, Tais Cristina Benites Vaz, and Vladimir dos Santos.  
10  
11 690 Hospital Bruno Born (RS): Fábio Fernandes Cardoso, Lucas Mallmann, Adriana Calvi,  
12  
13 691 and Nelson Barbosa Franco Neto. Hospital Cristo Redentor (RS): Flávio André Cardona  
14  
15 692 Alves, Manoel Nelson de Oliveira Silveira, Deisi Fonseca, and Susana Santini.  
16  
17 693 Irmandade da Santa Casa de Misericórdia de Porto Alegre (RS): Edison Moraes  
18  
19 694 Rodrigues Filho, Fernanda Paiva Bonow, Ruth Susin, and Kellen Patrícia Mayer  
20  
21 695 Machado. Hospital de Pronto Socorro Nelson Marchezan (RS): Danielle Molardi de  
22  
23 696 Aguiar, Caroline Salim Scheneider, Lidiane Couto Braz, and Carlos Francisco Pereira  
24  
25 697 do Bem. Hospital de Clínicas de Porto Alegre (RS): Rafael Barberena Moraes, Tatiana  
26  
27 698 Helena Reck, and Edison Moraes Rodrigues Filho. Hospital de Pronto Socorro de Porto  
28  
29 699 Alegre (RS): Vivian Wuerges de Aquino, Fernando Bourscheit, Luciano Marini, and  
30  
31 700 Cristiano Augusto Franke. Hospital Universitário São Francisco de Paula (RS): Bianca  
32  
33 701 Rodrigues Orlando, Luciano de Oliveira Teixeira, Sílvia Zluhan Bizarro, and Viviani  
34  
35 702 Aspirot Mendonça. Hospital São Vicente de Paulo (RS): José Oliveira Calvete, Lina  
36  
37 703 Maito, Sabrina Frighetto Henrich, and Larissa Assunta Pellizzaro. Hospital  
38  
39 704 Universitário São Francisco da Providência de Deus de Bragança Paulista (SP):  
40  
41 705 Giovana Colozza Mecatti, Thiago Corsi Filiponi, Felipe Fernandes Pires Barbosa, and  
42  
43 706 Flávia Gozzoli. Casa de Saúde de Santos (SP): André Scazufka Ribeiro, Paulo Henrique  
44  
45 707 Penha Rosateli, Zeher Mohamad Waked, and Ana Paula Quintal. Hospital de Base de  
46  
47 708 São José do Rio Preto (SP): João Fernando Picollo de Oliveira, Suzana Margareth Ajeje  
48  
49 709 Lobo, Regiane Sampaio, Marcos Morais, James da Luz Rol, and Luciana da Silva  
50  
51 710 Ferreira. Hospital das Clínicas de Botucatu (SP): Laercio Martins de Stefano, Marina  
52  
53  
54  
55  
56  
57  
58  
59  
60

- 1  
2  
3 711 Acosta Cleto, Silvia Eduara Kenrnely, and Cintia Banin. Hospital Municipal Irmã Dulce  
4  
5 712 (SP): Maria Odila Gomes Douglas, Renato Luis Borba, Daniela Boni, and Eliza Maria  
6  
7 713 Prado Monteiro. Hospital Paulistano (SP): Airton Leonardo de Oliveira Manoel, Ciro  
8  
9 714 Parioto Neto, and Siderleny Casari Martins. Hospital das Clínicas da Faculdade de  
10  
11 715 Medicina de Ribeirão Preto (SP): Wilson José Lovato, Marcelo Bonvento, Rodrigo  
12  
13 716 Barbosa Cerantola, and Leonardo Carvalho Palma. Hospital Beneficência Portuguesa de  
14  
15 717 São Paulo (SP): Salomon Ordinola Rojas, Viviane Cordeiro Veiga, Raquel Telles, and  
16  
17 718 Phillipe Travassos. Irmandade da Santa Casa de Misericórdia de São Paulo (SP):  
18  
19 719 Roberto Marco, Fabiano Hirata, Cinthia Consolin Vieira, and Ligia Peraza. Hospital  
20  
21 720 São Paulo (SP): Flávia Ribeiro Machado, Miriam Jackiu, Flávio Geraldo Resende  
22  
23 721 Freitas, and Alessandra Duarte Santiago. Irmandade Santa Casa de Misericórdia de  
24  
25 722 Sorocaba (SP): Márcia Rosangela Bertin, Luiz Otsubo, and Ana Laura Pinatti Marques.  
26  
27 723 Hospital Geral de Taipas (SP): Martha Pereira Torres and Gileade Gomes dos Santos.  
28  
29 724 Hospital Regional do Vale do Paraíba (SP): Márcia Christina Gomes, Caio Lúcio  
30  
31 725 Soubhia Nunes, and Felipe Alves Moreira. Central Estadual de Transplantes (AC):  
32  
33 726 Regiane Clelia Ferrari. Central Estadual de Transplantes (AL): Daniela Barbosa Ramos.  
34  
35 727 Central Estadual de Transplantes (AM): Leny Nascimento Motta Passos. Central  
36  
37 728 Estadual de Transplantes (BA): América Carolina Brandão de Melo Sodré and Rita de  
38  
39 729 Cassia Martins Pinto Pedosa. Central Estadual de Transplantes (CE): Eliana Regia  
40  
41 730 Barbosa de Almeida. Central Estadual de Transplantes (DF): Daniela Ferreira Salomão  
42  
43 731 Pontes. Central Estadual de Transplantes (ES): Raquel Duarte Correa Matiello and  
44  
45 732 Maria dos Santos Machado. Central Estadual de Transplantes (GO): Fernando Castro  
46  
47 733 and Gustavo Prudente Gonçalves. Central Estadual de Transplantes (MA): Maria Ines  
48  
49 734 Gomes de Oliveira. Central Estadual de Transplantes (MG): Omar Lopes Cancado  
50  
51 735 Junior. Central Estadual de Transplantes (MS): Claire Carmen Miozzo. Central Estadual  
52  
53  
54  
55  
56  
57  
58  
59  
60

- 1  
2  
3 736 de Transplantes (PB): Gyanna Lys Melo Moreira Montenegro. Central Estadual de  
4  
5 737 Transplantes (PE): Noemy Alencar de Carvalho Gomes. Central Estadual de  
6  
7 738 Transplantes (PR): Arlene Teresinha Cagol Garcia Badoch. Central Estadual de  
8  
9 739 Transplantes (RJ): Rodrigo Alves Sarlo and Gabriel Teixeira e Mello Pereira. Central  
10  
11  
12 740 Estadual de Transplantes (RN): Raissa de Medeiros Marques. Central Estadual de  
13  
14 741 Transplantes (RO): Suely Lima Araújo Toledo. Central Estadual de Transplantes (RS):  
15  
16 742 Cristiano Franke and Ricardo Klein Ruhling. Central Estadual de Transplantes (SE):  
17  
18 743 Benito Oliveira Fernandez. Central Estadual de Transplantes (SP): Agenor Spalini and  
19  
20 744 Marizete Peixoto Medeiros. Sistema Nacional de Transplantes: Brena Pinheiro Coelho  
21  
22  
23 745 and Joselio Emar de Araújo  
24  
25  
26  
27  
28  
29  
30  
31  
32  
33  
34  
35  
36  
37  
38  
39  
40  
41  
42  
43  
44  
45  
46  
47  
48  
49  
50  
51  
52  
53  
54  
55  
56  
57  
58  
59  
60



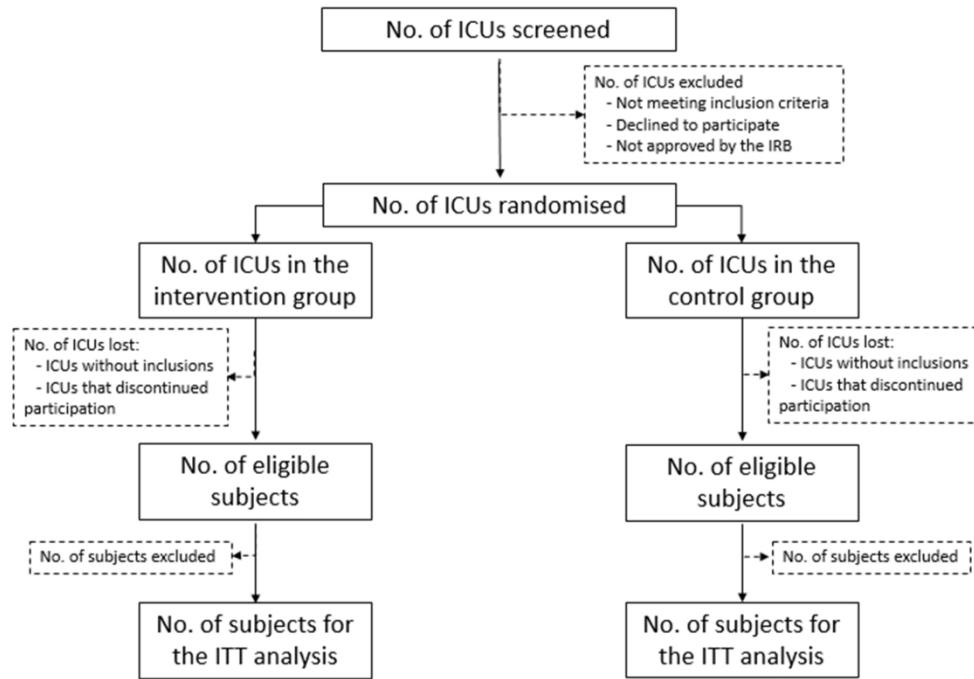

Study flow diagram.  
ICUs, intensive care units; IRB, Institutional Review Board; ITT, intention-to-treat; No., number

191x136mm (300 x 300 DPI)

1  
2  
3  
4  
5  
6  
7  
8  
9  
10  
11  
12  
13  
14  
15  
16  
17  
18  
19  
20  
21  
22  
23  
24  
25  
26  
27  
28  
29  
30  
31  
32  
33  
34  
35  
36  
37  
38  
39  
40  
41  
42  
43  
44  
45  
46  
47  
48  
49  
50  
51  
52  
53  
54  
55  
56  
57  
58  
59  
60

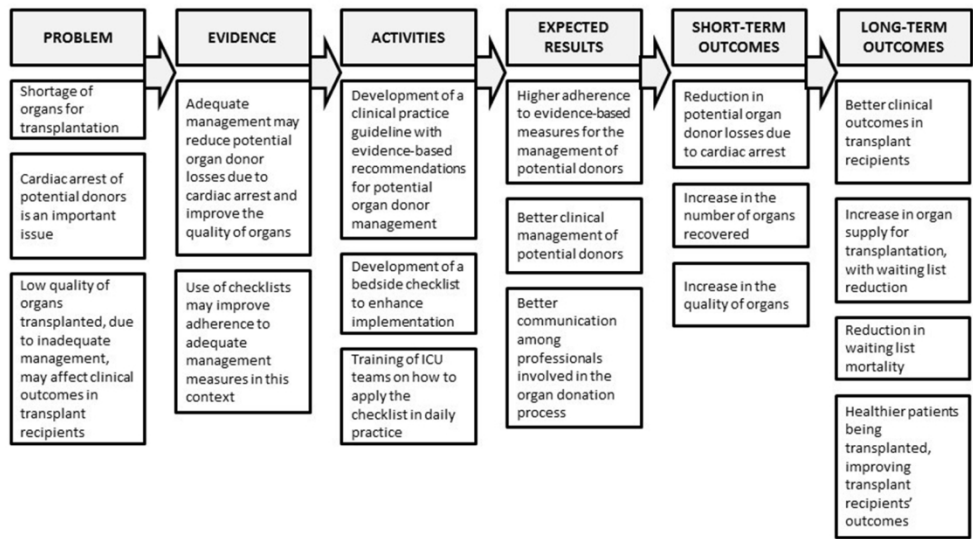

Logic model for the checklist intervention.

1  
2  
3  
4  
5  
6  
7  
8  
9  
10  
11  
12  
13  
14  
15  
16  
17  
18  
19  
20  
21  
22  
23  
24  
25  
26  
27  
28  
29  
30  
31  
32  
33  
34  
35  
36  
37  
38  
39  
40  
41  
42  
43  
44  
45  
46  
47  
48  
49  
50  
51  
52  
53  
54  
55  
56  
57  
58  
59  
60

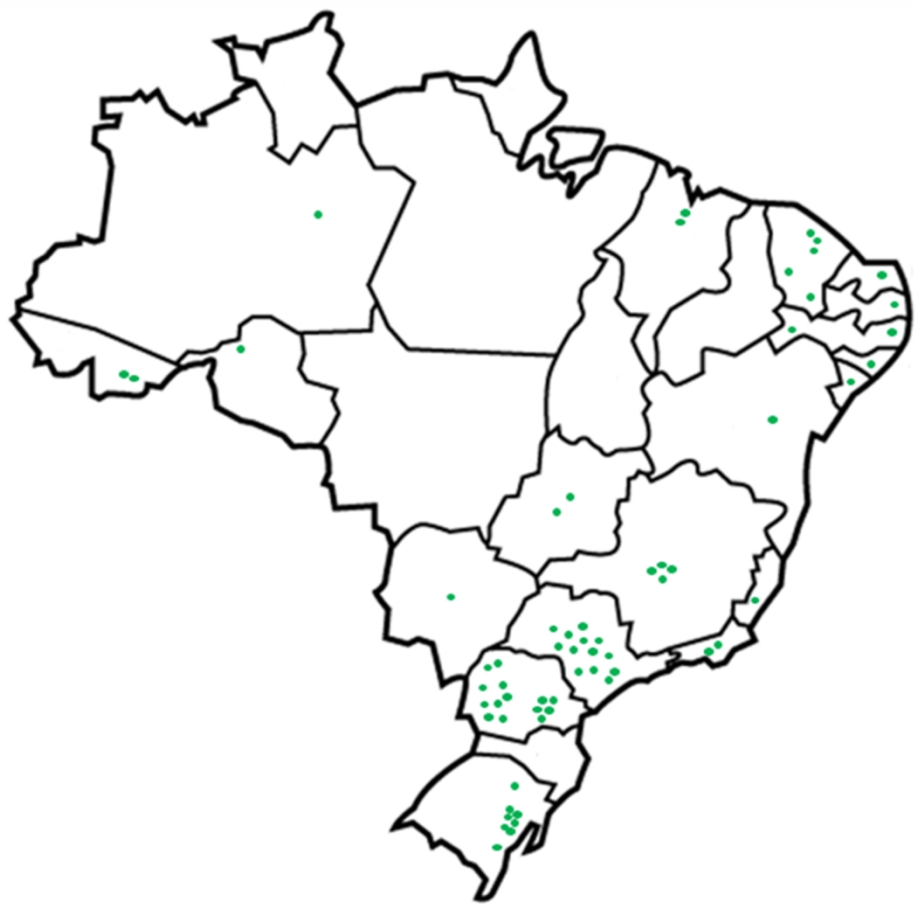

Geographical distribution of the participating intensive care units in Brazil.

157x146mm (300 x 300 DPI)

**Online Supplementary File 1.** Exclusion criteria of potential organ donors from the study.

| <b>Age</b>      | <b>Infection</b>                                                                                                                                                                                                                                                                                                                                                                                                                                                                                | <b>History of cancer</b>                                                                                                                                                                                                                                                                                                                                                                                                                                                                                                                |
|-----------------|-------------------------------------------------------------------------------------------------------------------------------------------------------------------------------------------------------------------------------------------------------------------------------------------------------------------------------------------------------------------------------------------------------------------------------------------------------------------------------------------------|-----------------------------------------------------------------------------------------------------------------------------------------------------------------------------------------------------------------------------------------------------------------------------------------------------------------------------------------------------------------------------------------------------------------------------------------------------------------------------------------------------------------------------------------|
| Age > 90 years. | HIV, HTLV-I and -II,<br>Uncontrolled sepsis,<br>Acute hepatitis,<br>Malaria,<br>Acute viral infections (e.g.,<br>rubella, rabies, West Nile virus,<br>adenovirus, enterovirus,<br>parvovirus, and viral<br>meningoencephalitis or of<br>unknown cause),<br>Cryptococcal<br>meningoencephalitis,<br>Prion diseases,<br>Active tuberculosis with < 2<br>months of treatment,<br>Bacterial colonisation of the<br>donor without antibiotic<br>treatment options (resistant to all<br>antibiotics). | Metastatic cancer,<br>Breast tumours,<br>Melanoma,<br>Soft-tissue sarcoma,<br>Haematological malignancy,<br>Primary tumours of the central<br>nervous system – Group 3<br>(anaplastic astrocytoma – grade<br>III, glioblastoma multiforme,<br>medulloblastoma, anaplastic<br>oligodendroglioma – Schmidt C<br>and D, malignant ependymoma,<br>pineoblastoma,<br>anaplastic/malignant<br>meningioma, intracranial<br>sarcoma, germ cell tumour –<br>except well-differentiated<br>teratoma, chordoma, and<br>primary cerebral lymphoma). |

1  
2  
3  
4 **Online Supplementary File 2.** English translation of the final version of the bedside checklist.  
5  
6

7 **Name:** \_\_\_\_\_  
8

9 **Date and time of 1<sup>st</sup> clinical examination consistent with brain death:** \_\_\_\_/\_\_\_\_/\_\_\_\_ :\_\_\_\_  
10

11 **Current date and time:** \_\_\_\_/\_\_\_\_/\_\_\_\_ :\_\_\_\_  
12  
13

| 14                                                                         | 15                           | 16                          | 17                          | 18                                                                                                                           | 19                           | 20                          | 21 | 22 |
|----------------------------------------------------------------------------|------------------------------|-----------------------------|-----------------------------|------------------------------------------------------------------------------------------------------------------------------|------------------------------|-----------------------------|----|----|
| GOALS TO BE ACHIEVED                                                       | STATUS                       |                             |                             | IMMEDIATE ACTIONS WHEN STATUS = "NO"                                                                                         | ACTION TAKEN?                |                             |    |    |
| 23 SaO <sub>2</sub> ≥ 90%?                                                 | <input type="checkbox"/> Yes | <input type="checkbox"/> No | <input type="checkbox"/> NA | Adjust FiO <sub>2</sub> and/or PEEP to SaO <sub>2</sub> ≥ 90%                                                                | <input type="checkbox"/> Yes | <input type="checkbox"/> No |    |    |
| 24 Tidal volume of 6 to 8 mL/kg of predicted weight?                       | <input type="checkbox"/> Yes | <input type="checkbox"/> No | <input type="checkbox"/> NA | Adjust Vt to 6 to 8 mL/kg                                                                                                    | <input type="checkbox"/> Yes | <input type="checkbox"/> No |    |    |
| 25 PEEP ≥ 8 cm H <sub>2</sub> O?                                           | <input type="checkbox"/> Yes | <input type="checkbox"/> No | <input type="checkbox"/> NA | Adjust PEEP to ≥ 8 cm H <sub>2</sub> O                                                                                       | <input type="checkbox"/> Yes | <input type="checkbox"/> No |    |    |
| 26 MAP ≥ 65 mm Hg and good tissue perfusion after<br>27 crystalloid bolus? | <input type="checkbox"/> Yes | <input type="checkbox"/> No | <input type="checkbox"/> NA | Continue fluid infusion while there is volume<br>responsiveness (e.g.: ΔPp ≥ 13% / ΔMAP ≥ 8% / ΔSV ≥<br>10% / CVP < 8 mm Hg) | <input type="checkbox"/> Yes | <input type="checkbox"/> No |    |    |
| 28 MAP ≥ 65 mm Hg and good tissue perfusion after<br>29 volume adjustment? | <input type="checkbox"/> Yes | <input type="checkbox"/> No | <input type="checkbox"/> NA | Maintain / initiate noradrenaline (dopamine if bradycardia)                                                                  | <input type="checkbox"/> Yes | <input type="checkbox"/> No |    |    |

|    |                                                |                              |                             |                             |                                                         |                              |                              |
|----|------------------------------------------------|------------------------------|-----------------------------|-----------------------------|---------------------------------------------------------|------------------------------|------------------------------|
| 1  |                                                |                              |                             |                             |                                                         |                              |                              |
| 2  |                                                |                              |                             |                             |                                                         |                              |                              |
| 3  |                                                |                              |                             |                             |                                                         |                              |                              |
| 4  | Vasopressin and hydrocortisone were associated |                              |                             |                             | Associate vasopressin (1 IU bolus + 0.5-2.4 IU / h) and | <input type="checkbox"/> Yes | <input type="checkbox"/> No  |
| 5  |                                                |                              |                             |                             |                                                         |                              |                              |
| 6  | after maintaining / initiating noradrenaline / | <input type="checkbox"/> Yes | <input type="checkbox"/> No | <input type="checkbox"/> NA | Associate hydrocortisone 100 mg 8/8 h                   | <input type="checkbox"/> Yes | <input type="checkbox"/> No  |
| 7  |                                                |                              |                             |                             |                                                         |                              |                              |
| 8  | desopamine?                                    |                              |                             |                             |                                                         |                              |                              |
| 9  |                                                |                              |                             |                             |                                                         |                              |                              |
| 10 |                                                |                              |                             |                             |                                                         |                              |                              |
| 11 |                                                |                              |                             |                             | Assess need for volume replacement                      |                              |                              |
| 12 | Diuresis < 4 mL/kg/h?                          | <input type="checkbox"/> Yes | <input type="checkbox"/> No | <input type="checkbox"/> NA | Maintain / initiate vasopressin or desmopressin (IV)    | <input type="checkbox"/> Yes | <input type="checkbox"/> No  |
| 13 |                                                |                              |                             |                             |                                                         |                              |                              |
| 14 |                                                |                              |                             |                             |                                                         |                              |                              |
| 15 |                                                |                              |                             |                             |                                                         |                              |                              |
| 16 | Na <sup>+</sup> < 155 mEq/L?                   | <input type="checkbox"/> Yes | <input type="checkbox"/> No | <input type="checkbox"/> NA | Correct and order laboratory control in 6 h             | <input type="checkbox"/> Yes | <input type="checkbox"/> No  |
| 17 |                                                |                              |                             |                             |                                                         |                              |                              |
| 18 | K <sup>+</sup> between 3.5 and 5.5 mEq/L?      | <input type="checkbox"/> Yes | <input type="checkbox"/> No | <input type="checkbox"/> NA | Correct and order laboratory control in 6 h             | <input type="checkbox"/> Yes | <input type="checkbox"/> No  |
| 19 |                                                |                              |                             |                             |                                                         |                              |                              |
| 20 |                                                |                              |                             |                             |                                                         |                              |                              |
| 21 | Mg <sup>++</sup> > 1.6 mEq/L?                  | <input type="checkbox"/> Yes | <input type="checkbox"/> No | <input type="checkbox"/> NA | Correct and order laboratory control in 6 h             | <input type="checkbox"/> Yes | <input type="checkbox"/> No  |
| 22 |                                                |                              |                             |                             |                                                         |                              |                              |
| 23 |                                                |                              |                             |                             | Insulin IV to maintain glycaemia between 140 and 180    | <input type="checkbox"/> Yes | <input type="checkbox"/> No  |
| 24 | Capillary glycaemia < 180 mg/dL?               | <input type="checkbox"/> Yes | <input type="checkbox"/> No | <input type="checkbox"/> NA | mg/dL                                                   |                              |                              |
| 25 |                                                |                              |                             |                             |                                                         |                              |                              |
| 26 |                                                |                              |                             |                             |                                                         |                              |                              |
| 27 |                                                |                              |                             |                             |                                                         |                              |                              |
| 28 | Haemoglobin ≥ 7 g/dL?                          | <input type="checkbox"/> Yes | <input type="checkbox"/> No | <input type="checkbox"/> NA | Transfuse red blood cells to Hb ≥ 7g/dL                 | <input type="checkbox"/> Yes | <input type="checkbox"/> No  |
| 29 |                                                |                              |                             |                             |                                                         |                              |                              |
| 30 | Absence of infection?                          | <input type="checkbox"/> Yes | <input type="checkbox"/> No | <input type="checkbox"/> NA | Initiate / maintain antibiotic therapy                  | <input type="checkbox"/> Yes | <input type="checkbox"/> No  |
| 31 |                                                |                              |                             |                             |                                                         |                              |                              |
| 32 | Proper body temperature?                       |                              |                             |                             | Get 34 to 35°C if without vasopressor                   | <input type="checkbox"/> NA  | <input type="checkbox"/> Yes |
| 33 |                                                |                              |                             |                             |                                                         |                              | <input type="checkbox"/> No  |
| 34 | No vasopressor: Goal: 34-35°C (after clinical  | <input type="checkbox"/> Yes | <input type="checkbox"/> No | <input type="checkbox"/> NA | Get > 35°C if with vasopressor                          | <input type="checkbox"/> NA  | <input type="checkbox"/> Yes |
| 35 |                                                |                              |                             |                             |                                                         |                              | <input type="checkbox"/> No  |
| 36 | tests)                                         |                              |                             |                             |                                                         |                              |                              |
| 37 |                                                |                              |                             |                             |                                                         |                              |                              |
| 38 |                                                |                              |                             |                             |                                                         |                              |                              |
| 39 |                                                |                              |                             |                             |                                                         |                              |                              |
| 40 |                                                |                              |                             |                             |                                                         |                              |                              |
| 41 |                                                |                              |                             |                             |                                                         |                              |                              |
| 42 |                                                |                              |                             |                             |                                                         |                              |                              |
| 43 |                                                |                              |                             |                             |                                                         |                              |                              |
| 44 |                                                |                              |                             |                             |                                                         |                              |                              |
| 45 |                                                |                              |                             |                             |                                                         |                              |                              |
| 46 |                                                |                              |                             |                             |                                                         |                              |                              |

1  
2  
3  
4 With vasopressor: > 35°C  
5  
6

7  
8  
9 **Nurse:** \_\_\_\_\_ **Intensivist:** \_\_\_\_\_

10  
11 CVP, central venous pressure;  $\Delta Pp$ , pulse pressure respiratory variation;  $\Delta SV$ , stroke volume respiratory variation;  $FiO_2$ , fraction of inspired  
12 oxygen; Hb, haemoglobin;  $K^+$ , potassium; MAP, mean arterial pressure;  $Mg^{++}$ , magnesium;  $Na^+$ , sodium; PEEP, positive end-expiratory  
13 pressure;  $SaO_2$ , arterial oxygen saturation;  $V_t$ , tidal volume.  
14  
15  
16  
17  
18  
19  
20  
21  
22  
23  
24  
25  
26  
27  
28  
29  
30  
31  
32  
33  
34  
35  
36  
37  
38  
39  
40  
41  
42  
43  
44  
45  
46

**Online Supplementary File 3.** Family interview support guide.

---

**PREPARING FOR THE FAMILY INTERVIEW**

---

**FOUNDATIONS: Establishing an aid relationship with family members**

**Triad: Respect, Empathy, and Authenticity**

---

**READ THE ACTIONS BELOW CAREFULLY BEFORE EACH STEP OF  
THE FAMILY INTERVIEW**

---

- |                                                                |                                                                                                                                                                                                                                                                                                                                                                                                                                           |
|----------------------------------------------------------------|-------------------------------------------------------------------------------------------------------------------------------------------------------------------------------------------------------------------------------------------------------------------------------------------------------------------------------------------------------------------------------------------------------------------------------------------|
| <b>1. Arranging the location of the interview</b>              | <input type="checkbox"/> Well-ventilated place or room<br><input type="checkbox"/> Restricted access (avoid interferences)<br><input type="checkbox"/> Enough space and chairs for all participants<br><input type="checkbox"/> No barriers between interviewer and interviewee (e.g., table, chairs, etc.)<br><input type="checkbox"/> Facial tissues and water are available<br><input type="checkbox"/> Phones are turned off          |
| <b>2. Defining the interview participants</b>                  | <input type="checkbox"/> ICU physician<br><input type="checkbox"/> Transplant co-ordinator and/or ICU nurse are present<br><input type="checkbox"/> 1st*/2nd** degree relatives or legally authorised representative***<br><p>*1st degree relatives: father, mother, children, full siblings; **2nd degree relatives: grandparents, grandchildren; ***Legally authorised representative: Surrogate/ judicial (documented)<sup>1</sup></p> |
| <b>3. Reviewing the components of non-verbal communication</b> | <input type="checkbox"/> Have all family members sitting down<br><input type="checkbox"/> Leave land-line phones off the hook and turn off mobile phones<br><input type="checkbox"/> Avoid crossing your arms or legs                                                                                                                                                                                                                     |
-



- 
- Have a trustful look and a serene expression
  - Speak in a gentle voice
  - Speak in a fine cadence, use pauses
  - Tolerate periods of silence
  - Give full attention to what family members say,  
“Listen more and talk less”
- 

**4. Reviewing the  
components of verbal  
communication**

- Greet everyone and introduce yourself
  - Refer to the patient by his/her name
  - Find out what the family knows about the case
  - Ask family members what they want to know
  - Summarise previous clinical data
  - Use simple language, avoid unnecessary technical  
jargon
  - Make your message clear, keep it short
  - Acknowledge emotions and negative reactions
  - Avoid expressions like “do not cry”, “keep calm”, “I  
know how you feel”
- 

**STEP 1 - FIRST FAMILY CONFERENCE**

**COMMUNICATING THE ESTABLISHMENT OF A BRAIN DEATH**

**PROTOCOL – 1<sup>st</sup> clinical examination**

- 
- |                                               |                                                                                                                                                                                                                                                                                      |
|-----------------------------------------------|--------------------------------------------------------------------------------------------------------------------------------------------------------------------------------------------------------------------------------------------------------------------------------------|
| <b>Key points of the first<br/>conference</b> | <ul style="list-style-type: none"> <li><input type="checkbox"/> <b>The ICU physician is responsible for<br/>communicating about the possibility of death</b></li> <li><input type="checkbox"/> <b>Communicate the <u>possibility</u> of brain death to the<br/>family</b></li> </ul> |
|-----------------------------------------------|--------------------------------------------------------------------------------------------------------------------------------------------------------------------------------------------------------------------------------------------------------------------------------------|
-

---

- **DO NOT** talk about donation

- Inform that **further tests** will be performed

- Review** and **confirm** that the family understands what a suspected death is and that further tests will be performed
- Make sure** the family knows how to reach you for questions

---

## STEP 2 - SECOND FAMILY CONFERENCE

### COMMUNICATING THE BRAIN DEATH – after 2 clinical tests and neuro-imaging evidence

---

#### Key points of the second conference

- The ICU physician is responsible for** communicating about the confirmation of brain death
- Communicate the confirmation of brain death to the family**
  - Preferably use the word ‘death’ instead of the expression ‘brain death’. (despite all efforts, unfortunately your loved one died...)
- DO NOT** talk about donation
- Wait silently** for the family’s reactions and needs
- Review** and **confirm** that the family understands that the patient is dead
- Ask the family** if they have any questions

**IMPORTANT:** “Proceed to STEP 3 only after making sure that the family understands the death”

---

## STEP 3 - THIRD FAMILY CONFERENCE

---

---

**INTERVIEW FOR MULTI-ORGAN DONATION - after the family's  
understanding of the death**

---

**Key points of the third  
conference**

**Person leading the interview:**

- 1<sup>st</sup> option: IHTC/OPO member
- 2<sup>nd</sup> option: ICU physician or nurse

**Aspects of the interview**

- Check whether the family **understands** the meaning of the diagnosis of brain death (understands that their loved one is dead)
- Explain to the family that the death occurred under **circumstances that allow them to help** other people by means of organ donation
- Ask the family if their loved one had expressed a wish in life to be an organ donor
- Offer the family, in view of this special situation, the opportunity to discuss about the possibility of organ donation (it is optional)
- Make sure** the family knows how to reach you for questions

---

**STEP 4 - PLANNING THE APPROACH ACCORDING TO THE FAMILY'S  
DECISION**

---

**FAMILY CONSENT FOR  
DONATION**

**FAMILY REFUSAL FOR  
DONATION**

**- Obtain the Family Consent Form,  
fully and correctly completed**

---

- 
- 1  
2  
3 - Complete the death certificate
- 4  
5  
6 - **Evaluate the possibility of a rescue**  
7 **interview** for donation after family  
8 conflicts have been resolved
- 9  
10 - **Consider withdrawing therapeutic**  
11 **support** “The physician is legally and  
12 ethically entitled to withdraw therapeutic  
13 support, including mechanical ventilation,  
14 and release the body to the family.”<sup>2</sup>  
15  
16  
17  
18  
19  
20  
21 - Complete the death certificate  
22
- 

## DEATH CERTIFICATE or FORENSIC MEDICAL EXAMINATION

### ICU physician’s responsibility

- 
- | □ NON-VIOLENT DEATH                                                                                                                                                                                                                                                                                                                                                                                                                                              | □ VIOLENT DEATH                                                                                                                                                                                                                                                                                                                                                                                                                                                                                                                                                            |
|------------------------------------------------------------------------------------------------------------------------------------------------------------------------------------------------------------------------------------------------------------------------------------------------------------------------------------------------------------------------------------------------------------------------------------------------------------------|----------------------------------------------------------------------------------------------------------------------------------------------------------------------------------------------------------------------------------------------------------------------------------------------------------------------------------------------------------------------------------------------------------------------------------------------------------------------------------------------------------------------------------------------------------------------------|
| <p>28</p> <p>29 - Complete the “<b>Death Certificate</b>”</p> <p>30 including the <b>date and time of death</b> and</p> <p>31 the data of the <b>last examination</b></p> <p>32 <b>performed</b> (2<sup>nd</sup> clinical examination) <b>or</b></p> <p>33 neuro-imaging evidence.</p> <p>34</p> <p>35</p> <p>36</p> <p>37</p> <p>38</p> <p>39</p> <p>40</p> <p>41</p> <p>42</p> <p>43</p> <p>44</p> <p>45</p> <p>46</p> <p>47</p> <p>48</p> <p>49</p> <p>50</p> | <p>30 - Complete the “<b>Forensic Medical</b></p> <p>31 <b>Examination Referral Form</b>” including</p> <p>32 the <b>date and time of death</b> and the data of</p> <p>33 the <b>last examination performed</b> (2<sup>nd</sup></p> <p>34 clinical examination) <b>or</b> neuro-imaging</p> <p>35 evidence.</p> <p>36</p> <p>37 - Request the Forensic Medical Institute</p> <p>38 for <b>AUTHORISATION TO REMOVE</b></p> <p>39 <b>ORGANS OR TISSUES</b></p> <p>40</p> <p>41</p> <p>42</p> <p>43</p> <p>44</p> <p>45</p> <p>46</p> <p>47</p> <p>48</p> <p>49</p> <p>50</p> |
- 

<sup>1</sup> Brazilian Federal Law No. 10211 of March 23, 2001;

<sup>2</sup> Brazilian Federal Board of Medicine – Resolution No. 1826 of December 6, 2007.

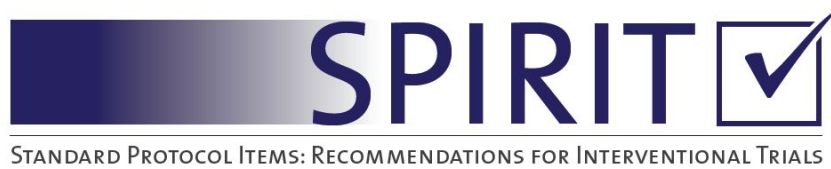

STANDARD PROTOCOL ITEMS: RECOMMENDATIONS FOR INTERVENTIONAL TRIALS

SPIRIT 2013 Checklist: Recommended items to address in a clinical trial protocol and related documents\*

| Section/item                      | Item No | Description                                                                                                                                                                                                                                                                                                                         |
|-----------------------------------|---------|-------------------------------------------------------------------------------------------------------------------------------------------------------------------------------------------------------------------------------------------------------------------------------------------------------------------------------------|
| <b>Administrative information</b> |         |                                                                                                                                                                                                                                                                                                                                     |
| Title                             | 1       | Descriptive title identifying the study design, population, interventions, and, if applicable, trial acronym (yes, Title page)                                                                                                                                                                                                      |
| Trial registration                | 2a      | Trial identifier and registry name. If not yet registered, name of intended registry (yes, Abstract and Methods)                                                                                                                                                                                                                    |
|                                   | 2b      | All items from the World Health Organization Trial Registration Data Set (yes)                                                                                                                                                                                                                                                      |
| Protocol version                  | 3       | Date and version identifier (not applicable)                                                                                                                                                                                                                                                                                        |
| Funding                           | 4       | Sources and types of financial, material, and other support (yes, Funding statement)                                                                                                                                                                                                                                                |
| Roles and responsibilities        | 5a      | Names, affiliations, and roles of protocol contributors (yes, Title page and Authors' contributions)                                                                                                                                                                                                                                |
|                                   | 5b      | Name and contact information for the trial sponsor (yes, Funding statement)                                                                                                                                                                                                                                                         |
|                                   | 5c      | Role of study sponsor and funders, if any, in study design; collection, management, analysis, and interpretation of data; writing of the report; and the decision to submit the report for publication, including whether they will have ultimate authority over any of these activities (yes, Organisational aspects of the study) |
|                                   | 5d      | Composition, roles, and responsibilities of the coordinating centre, steering committee, endpoint adjudication committee, data management team, and other individuals or groups overseeing the trial, if applicable (see Item 21a for data monitoring committee) (yes, Organisational aspects of the study)                         |
| <b>Introduction</b>               |         |                                                                                                                                                                                                                                                                                                                                     |
| Background and rationale          | 6a      | Description of research question and justification for undertaking the trial, including summary of relevant studies (published and unpublished) examining benefits and harms for each intervention (yes, Introduction)                                                                                                              |
|                                   | 6b      | Explanation for choice of comparators (yes, Introduction)                                                                                                                                                                                                                                                                           |

|    |                                                           |     |                                                                                                                                                                                                                                                                                                                                                                                                            |
|----|-----------------------------------------------------------|-----|------------------------------------------------------------------------------------------------------------------------------------------------------------------------------------------------------------------------------------------------------------------------------------------------------------------------------------------------------------------------------------------------------------|
| 1  |                                                           |     |                                                                                                                                                                                                                                                                                                                                                                                                            |
| 2  | Objectives                                                | 7   | Specific objectives or hypotheses (yes, Introduction and Objectives)                                                                                                                                                                                                                                                                                                                                       |
| 3  |                                                           |     |                                                                                                                                                                                                                                                                                                                                                                                                            |
| 4  | Trial design                                              | 8   | Description of trial design including type of trial (eg, parallel group, crossover, factorial, single group), allocation ratio, and framework (eg, superiority, equivalence, noninferiority, exploratory) (yes, Methods and analysis)                                                                                                                                                                      |
| 5  |                                                           |     |                                                                                                                                                                                                                                                                                                                                                                                                            |
| 6  |                                                           |     |                                                                                                                                                                                                                                                                                                                                                                                                            |
| 7  |                                                           |     |                                                                                                                                                                                                                                                                                                                                                                                                            |
| 8  |                                                           |     |                                                                                                                                                                                                                                                                                                                                                                                                            |
| 9  |                                                           |     |                                                                                                                                                                                                                                                                                                                                                                                                            |
| 10 | <b>Methods: Participants, interventions, and outcomes</b> |     |                                                                                                                                                                                                                                                                                                                                                                                                            |
| 11 |                                                           |     |                                                                                                                                                                                                                                                                                                                                                                                                            |
| 12 | Study setting                                             | 9   | Description of study settings (eg, community clinic, academic hospital) and list of countries where data will be collected. Reference to where list of study sites can be obtained (yes, Methods and analysis and Study planning and implementation schedule)                                                                                                                                              |
| 13 |                                                           |     |                                                                                                                                                                                                                                                                                                                                                                                                            |
| 14 |                                                           |     |                                                                                                                                                                                                                                                                                                                                                                                                            |
| 15 |                                                           |     |                                                                                                                                                                                                                                                                                                                                                                                                            |
| 16 |                                                           |     |                                                                                                                                                                                                                                                                                                                                                                                                            |
| 17 | Eligibility criteria                                      | 10  | Inclusion and exclusion criteria for participants. If applicable, eligibility criteria for study centres and individuals who will perform the interventions (eg, surgeons, psychotherapists) (yes, Methods and analysis)                                                                                                                                                                                   |
| 18 |                                                           |     |                                                                                                                                                                                                                                                                                                                                                                                                            |
| 19 |                                                           |     |                                                                                                                                                                                                                                                                                                                                                                                                            |
| 20 |                                                           |     |                                                                                                                                                                                                                                                                                                                                                                                                            |
| 21 |                                                           |     |                                                                                                                                                                                                                                                                                                                                                                                                            |
| 22 |                                                           |     |                                                                                                                                                                                                                                                                                                                                                                                                            |
| 23 | Interventions                                             | 11a | Interventions for each group with sufficient detail to allow replication, including how and when they will be administered ) (yes, Methods and analysis)                                                                                                                                                                                                                                                   |
| 24 |                                                           |     |                                                                                                                                                                                                                                                                                                                                                                                                            |
| 25 |                                                           |     |                                                                                                                                                                                                                                                                                                                                                                                                            |
| 26 |                                                           |     |                                                                                                                                                                                                                                                                                                                                                                                                            |
| 27 |                                                           |     |                                                                                                                                                                                                                                                                                                                                                                                                            |
| 28 |                                                           | 11b | Criteria for discontinuing or modifying allocated interventions for a given trial participant (eg, drug dose change in response to harms, participant request, or improving/worsening disease) (not applicable)                                                                                                                                                                                            |
| 29 |                                                           |     |                                                                                                                                                                                                                                                                                                                                                                                                            |
| 30 |                                                           |     |                                                                                                                                                                                                                                                                                                                                                                                                            |
| 31 |                                                           |     |                                                                                                                                                                                                                                                                                                                                                                                                            |
| 32 |                                                           | 11c | Strategies to improve adherence to intervention protocols, and any procedures for monitoring adherence (eg, drug tablet return, laboratory tests) (yes, Methods and analysis)                                                                                                                                                                                                                              |
| 33 |                                                           |     |                                                                                                                                                                                                                                                                                                                                                                                                            |
| 34 |                                                           |     |                                                                                                                                                                                                                                                                                                                                                                                                            |
| 35 |                                                           |     |                                                                                                                                                                                                                                                                                                                                                                                                            |
| 36 |                                                           |     |                                                                                                                                                                                                                                                                                                                                                                                                            |
| 37 |                                                           | 11d | Relevant concomitant care and interventions that are permitted or prohibited during the trial (yes, Methods and analysis)                                                                                                                                                                                                                                                                                  |
| 38 |                                                           |     |                                                                                                                                                                                                                                                                                                                                                                                                            |
| 39 |                                                           |     |                                                                                                                                                                                                                                                                                                                                                                                                            |
| 40 | Outcomes                                                  | 12  | Primary, secondary, and other outcomes, including the specific measurement variable (eg, systolic blood pressure), analysis metric (eg, change from baseline, final value, time to event), method of aggregation (eg, median, proportion), and time point for each outcome. Explanation of the clinical relevance of chosen efficacy and harm outcomes is strongly recommended (yes, Methods and analysis) |
| 41 |                                                           |     |                                                                                                                                                                                                                                                                                                                                                                                                            |
| 42 |                                                           |     |                                                                                                                                                                                                                                                                                                                                                                                                            |
| 43 |                                                           |     |                                                                                                                                                                                                                                                                                                                                                                                                            |
| 44 |                                                           |     |                                                                                                                                                                                                                                                                                                                                                                                                            |
| 45 |                                                           |     |                                                                                                                                                                                                                                                                                                                                                                                                            |
| 46 |                                                           |     |                                                                                                                                                                                                                                                                                                                                                                                                            |
| 47 |                                                           |     |                                                                                                                                                                                                                                                                                                                                                                                                            |
| 48 | Participant timeline                                      | 13  | Time schedule of enrolment, interventions (including any run-ins and washouts), assessments, and visits for participants. A schematic diagram is highly recommended (see Figure) (yes, Study planning and implementation schedule and Figure 1)                                                                                                                                                            |
| 49 |                                                           |     |                                                                                                                                                                                                                                                                                                                                                                                                            |
| 50 |                                                           |     |                                                                                                                                                                                                                                                                                                                                                                                                            |
| 51 |                                                           |     |                                                                                                                                                                                                                                                                                                                                                                                                            |
| 52 |                                                           |     |                                                                                                                                                                                                                                                                                                                                                                                                            |
| 53 |                                                           |     |                                                                                                                                                                                                                                                                                                                                                                                                            |
| 54 | Sample size                                               | 14  | Estimated number of participants needed to achieve study objectives and how it was determined, including clinical and statistical assumptions supporting any sample size calculations (yes, Methods and analysis)                                                                                                                                                                                          |
| 55 |                                                           |     |                                                                                                                                                                                                                                                                                                                                                                                                            |
| 56 |                                                           |     |                                                                                                                                                                                                                                                                                                                                                                                                            |
| 57 |                                                           |     |                                                                                                                                                                                                                                                                                                                                                                                                            |
| 58 |                                                           |     |                                                                                                                                                                                                                                                                                                                                                                                                            |
| 59 |                                                           |     |                                                                                                                                                                                                                                                                                                                                                                                                            |
| 60 |                                                           |     |                                                                                                                                                                                                                                                                                                                                                                                                            |

1  
2 Recruitment 15 Strategies for achieving adequate participant enrolment to reach  
3 target sample size (yes, Methods and analysis)  
4

5 **Methods: Assignment of interventions (for controlled trials)**  
6

7 Allocation:

8  
9 Sequence generation 16a Method of generating the allocation sequence (eg, computer-  
10 generated random numbers), and list of any factors for stratification.  
11 To reduce predictability of a random sequence, details of any planned  
12 restriction (eg, blocking) should be provided in a separate document  
13 that is unavailable to those who enrol participants or assign  
14 interventions (yes, Methods and analysis)  
15  
16

17 Allocation concealment 16b Mechanism of implementing the allocation sequence (eg, central  
18 telephone; sequentially numbered, opaque, sealed envelopes),  
19 describing any steps to conceal the sequence until interventions are  
20 assigned (yes, Methods and analysis)  
21  
22

23 Implementation 16c Who will generate the allocation sequence, who will enrol participants,  
24 and who will assign participants to interventions (yes, Methods and  
25 analysis)  
26

27 Blinding (masking) 17a Who will be blinded after assignment to interventions (eg, trial  
28 participants, care providers, outcome assessors, data analysts), and  
29 how (yes, Methods and analysis)  
30  
31

32 17b If blinded, circumstances under which unblinding is permissible, and  
33 procedure for revealing a participant's allocated intervention during  
34 the trial (unblinded study)  
35

36 **Methods: Data collection, management, and analysis**  
37

38 Data collection methods 18a Plans for assessment and collection of outcome, baseline, and other  
39 trial data, including any related processes to promote data quality (eg,  
40 duplicate measurements, training of assessors) and a description of  
41 study instruments (eg, questionnaires, laboratory tests) along with  
42 their reliability and validity, if known. Reference to where data  
43 collection forms can be found, if not in the protocol (yes, Methods and  
44 analysis – complementary information will be available at the  
45 statistical analysis plan paper)  
46  
47  
48

49 18b Plans to promote participant retention and complete follow-up,  
50 including list of any outcome data to be collected for participants who  
51 discontinue or deviate from intervention protocols (yes, Methods and  
52 analysis – complementary information will be available at the  
53 statistical analysis plan paper)  
54  
55  
56  
57  
58  
59  
60

|    |                                 |     |                                                                          |
|----|---------------------------------|-----|--------------------------------------------------------------------------|
| 1  |                                 |     |                                                                          |
| 2  | Data                            | 19  | Plans for data entry, coding, security, and storage, including any       |
| 3  | management                      |     | related processes to promote data quality (eg, double data entry;        |
| 4  |                                 |     | range checks for data values). Reference to where details of data        |
| 5  |                                 |     | management procedures can be found, if not in the protocol (yes,         |
| 6  |                                 |     | Methods and analysis – complementary information will be available       |
| 7  |                                 |     | at the statistical analysis plan paper)                                  |
| 8  |                                 |     |                                                                          |
| 9  |                                 |     |                                                                          |
| 10 | Statistical                     | 20a | Statistical methods for analysing primary and secondary outcomes.        |
| 11 | methods                         |     | Reference to where other details of the statistical analysis plan can be |
| 12 |                                 |     | found, if not in the protocol (yes, Methods and analysis –               |
| 13 |                                 |     | complementary information will be available at the statistical analysis  |
| 14 |                                 |     | plan paper)                                                              |
| 15 |                                 |     |                                                                          |
| 16 |                                 |     |                                                                          |
| 17 |                                 | 20b | Methods for any additional analyses (eg, subgroup and adjusted           |
| 18 |                                 |     | analyses) (yes, Methods and analysis – complementary information         |
| 19 |                                 |     | will be available at the statistical analysis plan paper)                |
| 20 |                                 |     |                                                                          |
| 21 |                                 | 20c | Definition of analysis population relating to protocol non-adherence     |
| 22 |                                 |     | (eg, as randomised analysis), and any statistical methods to handle      |
| 23 |                                 |     | missing data (eg, multiple imputation) (yes, Methods and analysis –      |
| 24 |                                 |     | complementary information will be available at the statistical analysis  |
| 25 |                                 |     | plan paper)                                                              |
| 26 |                                 |     |                                                                          |
| 27 |                                 |     |                                                                          |
| 28 | <b>Methods: Monitoring</b>      |     |                                                                          |
| 29 |                                 |     |                                                                          |
| 30 | Data monitoring                 | 21a | Composition of data monitoring committee (DMC); summary of its role      |
| 31 |                                 |     | and reporting structure; statement of whether it is independent from     |
| 32 |                                 |     | the sponsor and competing interests; and reference to where further      |
| 33 |                                 |     | details about its charter can be found, if not in the protocol.          |
| 34 |                                 |     | Alternatively, an explanation of why a DMC is not needed (yes,           |
| 35 |                                 |     | Methods and analysis)                                                    |
| 36 |                                 |     |                                                                          |
| 37 |                                 |     |                                                                          |
| 38 |                                 | 21b | Description of any interim analyses and stopping guidelines, including   |
| 39 |                                 |     | who will have access to these interim results and make the final         |
| 40 |                                 |     | decision to terminate the trial (yes, Methods and analysis –             |
| 41 |                                 |     | complementary information will be available at the statistical analysis  |
| 42 |                                 |     | plan paper)                                                              |
| 43 |                                 |     |                                                                          |
| 44 |                                 |     |                                                                          |
| 45 | Harms                           | 22  | Plans for collecting, assessing, reporting, and managing solicited and   |
| 46 |                                 |     | spontaneously reported adverse events and other unintended effects       |
| 47 |                                 |     | of trial interventions or trial conduct (yes, Methods and analysis –     |
| 48 |                                 |     | complementary information will be available at the statistical analysis  |
| 49 |                                 |     | plan paper)                                                              |
| 50 |                                 |     |                                                                          |
| 51 |                                 |     |                                                                          |
| 52 | Auditing                        | 23  | Frequency and procedures for auditing trial conduct, if any, and         |
| 53 |                                 |     | whether the process will be independent from investigators and the       |
| 54 |                                 |     | sponsor (yes, Methods and analysis – complementary information will      |
| 55 |                                 |     | be available at the statistical analysis plan paper)                     |
| 56 |                                 |     |                                                                          |
| 57 |                                 |     |                                                                          |
| 58 | <b>Ethics and dissemination</b> |     |                                                                          |
| 59 |                                 |     |                                                                          |
| 60 |                                 |     |                                                                          |



|    |                               |     |                                                                                                                                                                                                                                                                                                                     |
|----|-------------------------------|-----|---------------------------------------------------------------------------------------------------------------------------------------------------------------------------------------------------------------------------------------------------------------------------------------------------------------------|
| 1  |                               |     |                                                                                                                                                                                                                                                                                                                     |
| 2  | Research ethics approval      | 24  | Plans for seeking research ethics committee/institutional review board (REC/IRB) approval (yes, Ethics and dissemination)                                                                                                                                                                                           |
| 3  |                               |     |                                                                                                                                                                                                                                                                                                                     |
| 4  |                               |     |                                                                                                                                                                                                                                                                                                                     |
| 5  | Protocol amendments           | 25  | Plans for communicating important protocol modifications (eg, changes to eligibility criteria, outcomes, analyses) to relevant parties (eg, investigators, REC/IRBs, trial participants, trial registries, journals, regulators) (yes, Ethics and dissemination)                                                    |
| 6  |                               |     |                                                                                                                                                                                                                                                                                                                     |
| 7  |                               |     |                                                                                                                                                                                                                                                                                                                     |
| 8  |                               |     |                                                                                                                                                                                                                                                                                                                     |
| 9  |                               |     |                                                                                                                                                                                                                                                                                                                     |
| 10 | Consent or assent             | 26a | Who will obtain informed consent or assent from potential trial participants or authorised surrogates, and how (see Item 32) (yes, Ethics and dissemination)                                                                                                                                                        |
| 11 |                               |     |                                                                                                                                                                                                                                                                                                                     |
| 12 |                               |     |                                                                                                                                                                                                                                                                                                                     |
| 13 |                               |     |                                                                                                                                                                                                                                                                                                                     |
| 14 |                               |     |                                                                                                                                                                                                                                                                                                                     |
| 15 |                               | 26b | Additional consent provisions for collection and use of participant data and biological specimens in ancillary studies, if applicable (not applicable)                                                                                                                                                              |
| 16 |                               |     |                                                                                                                                                                                                                                                                                                                     |
| 17 |                               |     |                                                                                                                                                                                                                                                                                                                     |
| 18 |                               |     |                                                                                                                                                                                                                                                                                                                     |
| 19 | Confidentiality               | 27  | How personal information about potential and enrolled participants will be collected, shared, and maintained in order to protect confidentiality before, during, and after the trial (yes, Methods and analysis)                                                                                                    |
| 20 |                               |     |                                                                                                                                                                                                                                                                                                                     |
| 21 |                               |     |                                                                                                                                                                                                                                                                                                                     |
| 22 |                               |     |                                                                                                                                                                                                                                                                                                                     |
| 23 |                               |     |                                                                                                                                                                                                                                                                                                                     |
| 24 | Declaration of interests      | 28  | Financial and other competing interests for principal investigators for the overall trial and each study site (conflict of interest forms)                                                                                                                                                                          |
| 25 |                               |     |                                                                                                                                                                                                                                                                                                                     |
| 26 |                               |     |                                                                                                                                                                                                                                                                                                                     |
| 27 | Access to data                | 29  | Statement of who will have access to the final trial dataset, and disclosure of contractual agreements that limit such access for investigators (yes, Data sharing)                                                                                                                                                 |
| 28 |                               |     |                                                                                                                                                                                                                                                                                                                     |
| 29 |                               |     |                                                                                                                                                                                                                                                                                                                     |
| 30 |                               |     |                                                                                                                                                                                                                                                                                                                     |
| 31 | Ancillary and post-trial care | 30  | Provisions, if any, for ancillary and post-trial care, and for compensation to those who suffer harm from trial participation (not applicable)                                                                                                                                                                      |
| 32 |                               |     |                                                                                                                                                                                                                                                                                                                     |
| 33 |                               |     |                                                                                                                                                                                                                                                                                                                     |
| 34 |                               |     |                                                                                                                                                                                                                                                                                                                     |
| 35 |                               |     |                                                                                                                                                                                                                                                                                                                     |
| 36 | Dissemination policy          | 31a | Plans for investigators and sponsor to communicate trial results to participants, healthcare professionals, the public, and other relevant groups (eg, via publication, reporting in results databases, or other data sharing arrangements), including any publication restrictions (yes, Ethics and dissemination) |
| 37 |                               |     |                                                                                                                                                                                                                                                                                                                     |
| 38 |                               |     |                                                                                                                                                                                                                                                                                                                     |
| 39 |                               |     |                                                                                                                                                                                                                                                                                                                     |
| 40 |                               |     |                                                                                                                                                                                                                                                                                                                     |
| 41 |                               |     |                                                                                                                                                                                                                                                                                                                     |
| 42 |                               |     |                                                                                                                                                                                                                                                                                                                     |
| 43 |                               | 31b | Authorship eligibility guidelines and any intended use of professional writers (not applicable)                                                                                                                                                                                                                     |
| 44 |                               |     |                                                                                                                                                                                                                                                                                                                     |
| 45 |                               |     |                                                                                                                                                                                                                                                                                                                     |
| 46 |                               | 31c | Plans, if any, for granting public access to the full protocol, participant-level dataset, and statistical code (yes, Data sharing)                                                                                                                                                                                 |
| 47 |                               |     |                                                                                                                                                                                                                                                                                                                     |
| 48 |                               |     |                                                                                                                                                                                                                                                                                                                     |
| 49 |                               |     |                                                                                                                                                                                                                                                                                                                     |
| 50 | <b>Appendices</b>             |     |                                                                                                                                                                                                                                                                                                                     |
| 51 |                               |     |                                                                                                                                                                                                                                                                                                                     |
| 52 | Informed consent materials    | 32  | Model consent form and other related documentation given to participants and authorised surrogates (not applicable)                                                                                                                                                                                                 |
| 53 |                               |     |                                                                                                                                                                                                                                                                                                                     |
| 54 |                               |     |                                                                                                                                                                                                                                                                                                                     |
| 55 | Biological specimens          | 33  | Plans for collection, laboratory evaluation, and storage of biological specimens for genetic or molecular analysis in the current trial and for future use in ancillary studies, if applicable (not applicable)                                                                                                     |
| 56 |                               |     |                                                                                                                                                                                                                                                                                                                     |
| 57 |                               |     |                                                                                                                                                                                                                                                                                                                     |
| 58 |                               |     |                                                                                                                                                                                                                                                                                                                     |
| 59 |                               |     |                                                                                                                                                                                                                                                                                                                     |
| 60 |                               |     |                                                                                                                                                                                                                                                                                                                     |

1 \*It is strongly recommended that this checklist be read in conjunction with the SPIRIT 2013  
2 Explanation & Elaboration for important clarification on the items. Amendments to the  
3 protocol should be tracked and dated. The SPIRIT checklist is copyrighted by the SPIRIT  
4 Group under the Creative Commons "[Attribution-NonCommercial-NoDerivs 3.0 Unported](#)"  
5 license.  
6  
7  
8  
9  
10  
11  
12  
13  
14  
15  
16  
17  
18  
19  
20  
21  
22  
23  
24  
25  
26  
27  
28  
29  
30  
31  
32  
33  
34  
35  
36  
37  
38  
39  
40  
41  
42  
43  
44  
45  
46  
47  
48  
49  
50  
51  
52  
53  
54  
55  
56  
57  
58  
59  
60

For peer review only

# BMJ Open

## **DONORS (Donation Network to Optimise Organ Recovery Study): Study protocol to evaluate the implementation of an evidence-based checklist for brain-dead potential organ donor management in intensive care units, a cluster randomised trial**

|                               |                                                                                                                                                                                                                                                                                                                                                                                                                                                                                                                                                                                                                                                                                                                                                                                                                                                                                                                                                                                                                                                                                                                                                                                                                                                                                                                                                                                                                                                                                                                                                                                                                                                                                                                                                                                                                                                                                                                                                                 |
|-------------------------------|-----------------------------------------------------------------------------------------------------------------------------------------------------------------------------------------------------------------------------------------------------------------------------------------------------------------------------------------------------------------------------------------------------------------------------------------------------------------------------------------------------------------------------------------------------------------------------------------------------------------------------------------------------------------------------------------------------------------------------------------------------------------------------------------------------------------------------------------------------------------------------------------------------------------------------------------------------------------------------------------------------------------------------------------------------------------------------------------------------------------------------------------------------------------------------------------------------------------------------------------------------------------------------------------------------------------------------------------------------------------------------------------------------------------------------------------------------------------------------------------------------------------------------------------------------------------------------------------------------------------------------------------------------------------------------------------------------------------------------------------------------------------------------------------------------------------------------------------------------------------------------------------------------------------------------------------------------------------|
| Journal:                      | <i>BMJ Open</i>                                                                                                                                                                                                                                                                                                                                                                                                                                                                                                                                                                                                                                                                                                                                                                                                                                                                                                                                                                                                                                                                                                                                                                                                                                                                                                                                                                                                                                                                                                                                                                                                                                                                                                                                                                                                                                                                                                                                                 |
| Manuscript ID                 | bmjopen-2018-028570.R1                                                                                                                                                                                                                                                                                                                                                                                                                                                                                                                                                                                                                                                                                                                                                                                                                                                                                                                                                                                                                                                                                                                                                                                                                                                                                                                                                                                                                                                                                                                                                                                                                                                                                                                                                                                                                                                                                                                                          |
| Article Type:                 | Protocol                                                                                                                                                                                                                                                                                                                                                                                                                                                                                                                                                                                                                                                                                                                                                                                                                                                                                                                                                                                                                                                                                                                                                                                                                                                                                                                                                                                                                                                                                                                                                                                                                                                                                                                                                                                                                                                                                                                                                        |
| Date Submitted by the Author: | 08-May-2019                                                                                                                                                                                                                                                                                                                                                                                                                                                                                                                                                                                                                                                                                                                                                                                                                                                                                                                                                                                                                                                                                                                                                                                                                                                                                                                                                                                                                                                                                                                                                                                                                                                                                                                                                                                                                                                                                                                                                     |
| Complete List of Authors:     | <p>Westphal, Glauco; Hospital Moinhos de Vento (HMV), Research Projects Office</p> <p>Robinson, Caroline; Hospital Moinhos de Vento (HMV), Research Projects Office</p> <p>Biasi, Alexandre ; Universidade Federal de Sao Paulo; Hospital do Coração (HCor)</p> <p>Machado, Flávia; Universidade Federal de São Paulo (UNIFESP)</p> <p>Rosa, Regis; Hospital Moinhos de Vento (HMV), Intensive Care Unit</p> <p>Teixeira, Cassiano; Hospital Moinhos de Vento (HMV), Intensive Care Unit</p> <p>de Andrade, Joel; Organ Procurement Organization of Santa Catarina (OPO/SC)</p> <p>Franke, Cristiano Augusto; Hospital das Clínicas de Porto Alegre (HCPA), Adult Intensive Care Unit</p> <p>Azevedo, Luciano Cesar; Hospital Sírio-Libanês, Intensive Care Unit</p> <p>Bozza, Fernando; Department of Critical Care and Graduate Program in Translational Medicine, D'Or Institute for Research and Education, Rio de Janeiro, Brazil</p> <p>Guterres, Cátia; Hospital Moinhos de Vento, Research Projects Office</p> <p>da Silva, Daiana; Hospital Moinhos de Vento (HMV), Intensive Care Unit</p> <p>Sganzerla, Daniel; Hospital Moinhos de Vento (HMV), Research Projects Office</p> <p>do Prado, Débora; Hospital Moinhos de Vento (HMV), Research Projects Office</p> <p>Madalena, Itiana; Hospital Moinhos de Vento (HMV), Research Projects Office</p> <p>Rohden, Adriane; Hospital Moinhos de Vento, Research Projects Office</p> <p>da Silva, Sabrina; Hospital Moinhos de Vento (HMV), Research Projects Office</p> <p>Giordani, Natalia Elis; Hospital Moinhos de Vento (HMV), Research Projects Office</p> <p>Andrighetto, Luiza; Hospital Moinhos de Vento, Research Projects Office</p> <p>Benck, Patrícia; Hospital Moinhos de Vento (HMV), Research Projects Office</p> <p>Roman, Fernando Roberto; Hospital Bom Jesus de Toledo, Adult Intensive Care Unit</p> <p>de Melo, Maria de Fátima; Hospital da Restauração, Adult Intensive Care</p> |

|                                 |                                                                                                                                                                                                                                                                                                                                                                                                                                                                                                                                                                                                                                                                                                                                                                                                                                                                                                                                                                                                                                                                                                                                                                                                                                                                                                                                                                          |
|---------------------------------|--------------------------------------------------------------------------------------------------------------------------------------------------------------------------------------------------------------------------------------------------------------------------------------------------------------------------------------------------------------------------------------------------------------------------------------------------------------------------------------------------------------------------------------------------------------------------------------------------------------------------------------------------------------------------------------------------------------------------------------------------------------------------------------------------------------------------------------------------------------------------------------------------------------------------------------------------------------------------------------------------------------------------------------------------------------------------------------------------------------------------------------------------------------------------------------------------------------------------------------------------------------------------------------------------------------------------------------------------------------------------|
|                                 | <p>Unit<br/> Pereira, Thattayne; Hospital de Pronto Socorro João Paulo II, Adult Intensive Care Unit<br/> Grion, Cintia; Hospital Evangélico de Londrina, Adult Intensive Care Unit;<br/> Hospital Universitário Regional do Norte do Paraná, Adult Intensive Care Unit<br/> Diniz, Pedro; Hospital de Ensino Doutor Washington Antônio de Barros, Adult Intensive Care Unit<br/> Oliveira, João Fernando; Hospital de Base de São José do Rio Preto, Adult Intensive Care Unit<br/> Mecatti, Giovana; Hospital Universitário São Francisco da Providência de Deus de Bragança Paulista, Adult Intensive Care Unit<br/> Alves, Flávio André; Hospital Cristo Redentor, Adult Intensive Care Unit<br/> Moraes, Rafael Barberena; Hospital de Clínicas de Porto Alegre (HCPA), Adult Intensive Care Unit<br/> Nobre, Vandack; Universidade Federal de Minas Gerais, Adult Intensive Care Unit<br/> Hammes, Luciano; Hospital Moinhos de Vento, Superintendence<br/> Meade, Maureen; McMaster University, Department of Medicine and Department of Health Evidence and Impact<br/> Nothen, Rosana; Universidade Federal do Rio Grande do Sul (UFRGS), General Hospital of the School of Medicine; Ministério da Saúde, General Co-ordination Office of the National Transplant System<br/> Falavigna, Maicon; Hospital Moinhos de Vento (HMV), Research Projects Office</p> |
| <b>Primary Subject Heading</b>: | Intensive care                                                                                                                                                                                                                                                                                                                                                                                                                                                                                                                                                                                                                                                                                                                                                                                                                                                                                                                                                                                                                                                                                                                                                                                                                                                                                                                                                           |
| Secondary Subject Heading:      | Intensive care                                                                                                                                                                                                                                                                                                                                                                                                                                                                                                                                                                                                                                                                                                                                                                                                                                                                                                                                                                                                                                                                                                                                                                                                                                                                                                                                                           |
| Keywords:                       | brain death, cardiac arrest, organ donation, checklist, quality improvement                                                                                                                                                                                                                                                                                                                                                                                                                                                                                                                                                                                                                                                                                                                                                                                                                                                                                                                                                                                                                                                                                                                                                                                                                                                                                              |
|                                 |                                                                                                                                                                                                                                                                                                                                                                                                                                                                                                                                                                                                                                                                                                                                                                                                                                                                                                                                                                                                                                                                                                                                                                                                                                                                                                                                                                          |

SCHOLARONE™  
Manuscripts

1 **DONORS (Donation Network to Optimise Organ Recovery Study): Study protocol**  
2 **to evaluate the implementation of an evidence-based checklist for brain-dead**  
3 **potential organ donor management in intensive care units, a cluster randomised**  
4 **trial**

5  
6 Glauco Adrieno Westphal,<sup>1</sup> Caroline Cabral Robinson,<sup>2</sup> Alexandre Biasi Cavalcanti,<sup>3</sup>  
7 Flávia Ribeiro Machado,<sup>4</sup> Regis Goulart Rosa,<sup>5</sup> Cassiano Teixeira,<sup>5</sup> Joel de Andrade,<sup>6</sup>  
8 Cristiano Augusto Franke,<sup>7</sup> Luciano Cesar Pontes Azevedo,<sup>8</sup> Fernando Augusto Bozza,<sup>9</sup>  
9 Cátia Moreira Guterres,<sup>2</sup> Daiana Barbosa da Silva,<sup>5</sup> Daniel Sganzerla,<sup>2</sup> Débora  
10 Zechmeister do Prado,<sup>2</sup> Itiana Cardoso Madalena,<sup>2</sup> Adriane Isabel Rohden,<sup>2</sup>  
11 Sabrina Souza da Silva,<sup>2</sup> Natalia Elis Giordani,<sup>2</sup> Luiza Vitelo Andrighetto,<sup>2</sup>  
12 Patrícia Spessatto Benck,<sup>2</sup> Fernando Roberto Roman,<sup>10</sup> Maria de Fátima Rodrigues  
13 Buarque de Melo,<sup>11</sup> Thattyane Borba Pereira,<sup>12</sup> Cintia Magalhães Carvalho Grion,<sup>13</sup>  
14 Pedro Carvalho Diniz,<sup>14</sup> João Fernando Picollo de Oliveira,<sup>15</sup> Giovana Colozza  
15 Mecatti,<sup>16</sup> Flávio André Cardona Alves,<sup>17</sup> Rafael Barberena Moraes,<sup>18</sup> Vandack Nobre,<sup>19</sup>  
16 Luciano Serpa Hammes,<sup>20</sup> Maureen O. Meade,<sup>21</sup> Rosana Reis Nothen,<sup>22</sup>  
17 Maicon Falavigna<sup>2</sup> on behalf of the DONORS (Donation Network for Organ Recovery  
18 Study) Investigators and the BRICNet\*

19  
20 <sup>1</sup> Centro Hospitalar Unimed; Hospital Municipal São José, Joinville, SC, Brazil;  
21 Research Projects Office, Hospital Moinhos de Vento (HMV), Porto Alegre, RS, Brazil.

22 <sup>2</sup> Research Projects Office, HMV, Porto Alegre, RS, Brazil.

23 <sup>3</sup> Research Institute, Hospital do Coração (HCor), São Paulo, SP, Brazil

24 <sup>4</sup> Department of Anaesthesiology, Pain and Intensive Care, Universidade Federal de São  
25 Paulo (UNIFESP), São Paulo, SP, Brazil.

- 1  
2  
3 26 <sup>5</sup> Adult Intensive Care Unit, HMV, Porto Alegre, RS, Brazil.  
4  
5 27 <sup>6</sup> Organ Procurement Organization of Santa Catarina (OPO/SC), Florianópolis, SC,  
6  
7 28 Brazil.  
8  
9  
10 29 <sup>7</sup> Adult Intensive Care Unit, Hospital das Clínicas de Porto Alegre (HCPA); Trauma  
11  
12 30 Intensive Care Unit, Hospital de Pronto de Socorro (HPS), Porto Alegre, RS, Brazil.  
13  
14 31 <sup>8</sup> Intensive Care Unit, Hospital Sírio-Libanês. São Paulo, SP, Brazil.  
15  
16  
17 32 <sup>9</sup> National Institute of Infectious Disease Evandro Chagas, Fundação Oswaldo Cruz  
18  
19 33 (FIOCRUZ); D'Or Institute for Research and Education (IDOR). Rio de Janeiro, RJ,  
20  
21 34 Brazil.  
22  
23  
24 35 <sup>10</sup> Adult Intensive Care Unit, Hospital Bom Jesus de Toledo, Toledo, PR, Brazil.  
25  
26 36 <sup>11</sup> Adult Intensive Care Unit, Hospital da Restauração, Recife, PE, Brazil.  
27  
28 37 <sup>12</sup> Adult Intensive Care Unit, Hospital de Pronto Socorro João Paulo II, Porto Velho,  
29  
30 38 RO, Brazil.  
31  
32  
33 39 <sup>13</sup> Adult Intensive Care Unit, Hospital Evangélico de Londrina; Hospital Universitário  
34  
35 40 Regional do Norte do Paraná, Londrina, PR, Brazil.  
36  
37 41 <sup>14</sup> Adult Intensive Care Unit, Hospital de Ensino Doutor Washington Antônio de Barros,  
38  
39 42 Petrolina, PE, Brazil.  
40  
41  
42 43 <sup>15</sup> Adult Intensive Care Unit, Hospital de Base de São José do Rio Preto, São José do  
43  
44 44 Rio Preto, SP, Brazil.  
45  
46  
47 45 <sup>16</sup> Adult Intensive Care Unit, Hospital Universitário São Francisco da Providência de  
48  
49 46 Deus de Bragança Paulista (HUSF). Bragança Paulista, SP, Brazil.  
50  
51  
52 47 <sup>17</sup> Adult Intensive Care Unit, Hospital Cristo Redentor, Porto Alegre, RS, Brazil.  
53  
54 48 <sup>18</sup> Adult Intensive Care Unit, HCPA, Porto Alegre, RS, Brazil.  
55  
56 49 <sup>19</sup> Adult Intensive Care Unit, Hospital das Clínicas, Universidade Federal de Minas  
57  
58 50 Gerais (UFMG), Belo Horizonte, MG, Brazil.  
59  
60

1  
2  
3 51 <sup>20</sup> Superintendence, H MV, Porto Alegre, RS, Brazil.  
4

5 52 <sup>21</sup> Department of Medicine and Department of Health Evidence and Impact, McMaster  
6  
7  
8 53 University, Hamilton, ON, Canada.  
9

10 54 <sup>22</sup> General Hospital of the School of Medicine, Universidade Federal do Rio Grande do  
11  
12 55 Sul (UFGRS), Porto Alegre, RS, Brazil; General Co-ordination Office of the National  
13  
14 56 Transplant System, Ministério da Saúde, Brasília, DF, Brazil.  
15  
16

17 57

18  
19 58 **Corresponding author**

20  
21 59 Glauco Adrieno Westphal

22  
23 60 Rua Ramiro Barcelos, 910

24  
25 61 90035-001, Porto Alegre, RS

26  
27 62 Brazil

28  
29 63 E-mail: glauco.ww@gmail.com

30  
31 64 Tel.:+55-47-99964.2295

32  
33 65

34  
35 66 **Word count** (excluding title page, abstract, references, figures and tables): 4008  
36  
37  
38  
39  
40  
41  
42  
43  
44  
45  
46  
47  
48  
49  
50  
51  
52  
53  
54  
55  
56  
57  
58  
59  
60

1  
2  
3 67 **ABSTRACT**  
4

5 68 **Introduction:** There is an increasing demand for multi-organ donors for organ  
6  
7  
8 69 transplantation programmes. This study protocol describes the Donation Network to  
9  
10 70 Optimise Organ Recovery Study (DONORS), a planned cluster randomised controlled  
11  
12 71 trial that aims to evaluate the effectiveness of the implementation of an evidence-based,  
13  
14 72 goal-directed checklist for brain-dead potential organ donor management in intensive  
15  
16 73 care units (ICUs) in reducing the loss of potential donors due to cardiac arrest.  
17  
18

19 74 **Methods and analysis:** The study will include ICUs of at least 60 Brazilian sites with  
20  
21 75 an average of >10 annual notifications of valid potential organ donors. Hospitals will be  
22  
23 76 randomly assigned (with a 1:1 allocation ratio) to the intervention group, which will  
24  
25 77 involve the implementation of an evidence-based, goal-directed checklist for potential  
26  
27 78 organ donor maintenance, or the control group, which will maintain the usual care  
28  
29 79 practices of the ICU. Team members from all participating ICUs will receive training on  
30  
31 80 how to conduct family interviews for organ donation. The primary outcome will be loss  
32  
33 81 of potential donors due to cardiac arrest. Secondary outcomes will include the number  
34  
35 82 of actual organ donors and the number of organs recovered per actual donor.  
36  
37  
38

39 83 **Ethics and dissemination:** The Institutional Review Board (IRB) of the Co-ordinating  
40  
41 84 centre and of each participating site individually approved the study. We requested a  
42  
43 85 waiver of informed consent for the IRB of each site. Study results will be disseminated  
44  
45 86 to the general medical community through publications in peer-reviewed medical  
46  
47 87 journals.  
48  
49

50 88 **Keywords:** brain death, cardiac arrest, organ donation, checklist, quality improvement  
51  
52

53 89 **Trial registration:** ClinicalTrials.gov, NCT03179020, registered June 7, 2017.  
54  
55  
56  
57  
58  
59  
60



1  
2  
3 90 **Strengths and limitations of this study**  
4

- 5 91 • This is the first randomised trial to evaluate whether a goal-directed checklist for  
6  
7  
8 92 the management of brain-dead potential organ donors may be useful in reducing  
9  
10 93 cardiac arrests and contributing to increase organ availability for transplants.  
11  
12 94 • The preparation of the goal-directed checklist was preceded by the review of a  
13  
14 95 clinical practice guideline following the Grades of Recommendation  
15  
16 96 Assessment, Development and Evaluation (GRADE) system.  
17  
18  
19 97 • Brazil is a country with a wide spectrum of demographic and socioeconomic  
20  
21 98 scenarios; the diversity of institutions to be included in DONORS will allow us  
22  
23 99 to provide results in a broad range of demographic and socioeconomic scenarios.  
24  
25  
26 100 • Main study limitations are the unblinded design and the high heterogeneity of  
27  
28 101 care and outcomes expected among centres in the study.  
29  
30  
31  
32  
33  
34  
35  
36  
37  
38  
39  
40  
41  
42  
43  
44  
45  
46  
47  
48  
49  
50  
51  
52  
53  
54  
55  
56  
57  
58  
59  
60

## 102 INTRODUCTION

103 Organ transplantation is the only treatment option for many patients affected  
104 by end-stage organ failure. Despite advances in the field of organ donation, the disparity  
105 between the number of patients on transplant waiting lists and the availability of organs  
106 for transplantation is increasing. Several parameters determine the availability of  
107 suitable organs for donation, and many of these depend on a successful sequence of  
108 actions by several healthcare professionals, starting with the identification of a potential  
109 multi-organ donor and ending with surgical organ procurement.[1-5] In this process,  
110 important factors contributing to the gap between organ supply and demand include  
111 failure to identify and report brain death, lack of family consent for organ donation,  
112 inaccurate perceptions of contraindications to organ donation, and haemodynamic  
113 instability that may compromise the quality of organs or even lead to loss of donors due  
114 to cardiac arrest.[1-3] A systematic application of clinical management strategies aimed  
115 at the haemodynamic stabilisation of brain-dead donors may contribute to an increase in  
116 the number of organs for transplantation by improving the quality of organs and  
117 reducing the loss of potential donors due to cardiac arrest.[1, 2, 4] In addition, other  
118 measures such as optimal ventilatory support and temperature control may improve the  
119 quality of organs, resulting in a higher organ recovery rate and better clinical outcomes  
120 for transplant recipients.[6, 7]

121 Checklists have an established role in healthcare to prevent omissions while  
122 performing complex procedures. A series of studies have shown that the use of a goal-  
123 directed checklist may help the systematic application of clinical guidelines, leading to  
124 greater adherence to evidence-based clinical interventions and improving clinical  
125 outcomes. Examples include the World Health Organisation (WHO) Surgical Safety  
126 Checklist, the Keystone Intensive Care Unit (ICU) Project checklist to prevent catheter-

1  
2  
3 127 related bloodstream infection, and clinical checklists to ensure patient safety in the  
4  
5 128 ICU.[8-11]  
6  
7 129 There is a lack of evidence for the use of checklists regarding the clinical  
8  
9  
10 130 aspects of improving organ availability for transplantation of brain-dead donors. Some  
11  
12 131 observational studies have reported that the application of a goal-directed checklist to  
13  
14 132 guide the management of brain-dead potential organ donors may reduce the rate of  
15  
16 133 cardiac arrest and increase the number of organs recovered per donor. [12-19] However,  
17  
18 134 given the relatively small number of studies, their observational design and  
19  
20 135 inconsistency of findings, often related with barriers to carrying out studies in this  
21  
22 136 scenario [5], this literature cannot yet support the use of a goal-directed checklist in the  
23  
24 137 current management of brain-dead potential organ donors [20].  
25  
26  
27

28 138 Our hypothesis is that supporting the management of potential organ donors  
29  
30 139 with the use of an evidence-based bedside checklist may reduce the loss of potential  
31  
32 140 organ donors due to cardiac arrest and increase the number of donors and organs  
33  
34 141 transplanted per donor. In this protocol, we describe the methods to be used in the  
35  
36 142 Donation Network to Optimise Organ Recovery Study (DONORS).  
37  
38  
39

40 143

## 41 144 **OBJECTIVES**

### 42 145 **Primary objective**

43  
44  
45 146 The primary objective is to evaluate the effectiveness of the implementation of  
46  
47 147 an evidence-based bedside checklist, containing goals and recommendations of care as  
48  
49 148 guidance for the management of brain-dead potential organ donors, in reducing  
50  
51 149 potential organ donor losses due to cardiac arrest.  
52  
53

54 150

### 55 151 **Secondary objectives**

56  
57  
58  
59  
60

1  
2  
3 152 Secondary objectives are to assess whether the evidence-based, goal-directed checklist  
4  
5 153 is effective in (a) increasing the number of actual organ donors and (b) increasing the  
6  
7 154 number of organs recovered per actual donor.  
8  
9

10 155

## 11 156 **METHODS AND ANALYSIS**

12  
13  
14 157 The protocol is registered at ClinicalTrials.gov (NCT03179020) and the  
15  
16  
17 158 present manuscript provides additional details regarding study design and methodology.  
18  
19 159 The items from the World Health Organization trial registration data set are described in  
20  
21 160 the Online Supplementary File 1.  
22  
23

24 161

### 25 162 **Study design**

26  
27  
28 163 DONORS is a parallel cluster randomised controlled trial involving ICUs of  
29  
30 164 Brazilian hospitals. We will randomly assign hospitals to the intervention group,  
31  
32 165 comprising the checklist implementation, or the control group, consisting of usual care  
33  
34 166 in each ICU (Figure 1).  
35  
36

37 167

### 38 168 **Participants**

39  
40 169 Cluster eligibility, recruitment and exclusion criteria

41  
42  
43 170 We will invite adult ICUs with an average of at least 10 annual notifications of  
44  
45 171 potential organ donors in the prior two years. Information regarding notifications is  
46  
47 172 provided by the Brazilian National Transplant System.  
48  
49

50  
51 173 Coronary care units, intermediate care units and emergency departments are not  
52  
53 174 eligible. We will also exclude institutions that already systematically use checklists as  
54  
55 175 guidance for the management of potential organ donors supported by implementation  
56  
57  
58  
59  
60

1  
2  
3 176 tools, such as guidelines and clinical decision algorithms for bedside use, in print or  
4  
5 177 digital form.  
6

7  
8 178 Patient eligibility and exclusion criteria  
9

10 179 We will screen and include consecutive brain-dead potential organ donors, as  
11  
12 180 confirmed by the first clinical examination consistent with having brain death, within  
13  
14 181 the age range of 14 to 90 years. Only ICU patients will be included; potential donors  
15  
16 182 outside the ICU will be included in the study if admitted to ICU within three hours of  
17  
18 183 initial assessment.  
19  
20

21 184 Diagnosis of brain death will be made according to the Brazilian Federal Board  
22  
23 185 of Medicine guidance, consisting of: two clinical examinations performed by two  
24  
25 186 different physicians, in an interval of at least 1 hour between the examinations, and one  
26  
27 187 apnoea test followed by neuro-imaging (transcranial Doppler, cerebral arteriography,  
28  
29 188 electroencephalography, or brain scintigraphy).[21, 22] We will exclude brain-dead  
30  
31 189 patients who are not candidates for organ donation (Online Supplementary File 2).  
32  
33  
34

35 190

36  
37 191 **Interventions**  
38

39  
40 192 Checklist for brain-dead potential organ donors management  
41

42 193 After a preliminary prospective study [13] that found a positive impact of a  
43  
44 194 clinical goal-directed protocol on reducing irreversible cardiac arrests in brain-dead  
45  
46 195 potential organ donors, an updated checklist was generated after drawing up a clinical  
47  
48 196 practice guideline (CPG) for brain-dead potential organ donor management. The CPG  
49  
50 197 recommendations were developed from July 2016 to March 2017, as a joint initiative of  
51  
52 198 the Brazilian Ministry of Health, Brazilian Association of Intensive Care Medicine  
53  
54 199 (AMIB), and Brazilian Association of Organ Transplantation (ABTO).[23] The  
55  
56 200 recommendations were developed using the Grading of Recommendations, Assessment,  
57  
58  
59  
60

1  
2  
3 201 Development and Evaluation (GRADE) system.[24] The following criteria were  
4  
5 202 considered in the decision-making process: the risks and benefits of interventions; the  
6  
7 203 quality of evidence for risks and benefits; resource use and costs; and acceptability by  
8  
9 204 healthcare professionals.

10  
11  
12 205 The checklist was designed to address CPG goals and recommendations that  
13  
14 206 involve temperature control, mechanical ventilation, haemodynamic control, endocrine  
15  
16 207 and metabolic control, and use of antibiotics and blood products, as required, and  
17  
18 208 hormone administration (hydrocortisone, vasopressin and/or desmopressin, insulin).  
19  
20 209 Thyroid hormone was not recommended due to lack of evidence to confirm the benefit  
21  
22 210 of its use. [25,26] We tested the checklist in four ICUs with high volume in brain death  
23  
24 211 notifications that participated in the preliminary study [13] and make minimal  
25  
26 212 adjustments suggested by the professionals that tested the tool. The full checklist is  
27  
28 213 available in Online Supplementary File 3. Figure 2 describes the logic model for the  
29  
30 214 intervention to be tested in this study. We will provide on-site training in each ICU for  
31  
32 215 healthcare professionals to inform how to implement the checklist and how to apply the  
33  
34 216 intended recommendations.

35  
36  
37 217 The checklist will be bedside applied immediately after the time of potential  
38  
39 218 donor inclusion in the study and repeated every six hours until organ recovery or loss of  
40  
41 219 the potential donor. A member of the Intra-Hospital Transplant Co-ordination (IHTC)  
42  
43 220 or a designated ICU professional will apply the paper-based checklist at the bedside.  
44  
45 221 The same individual will be responsible for personally prompting the medical team to  
46  
47 222 modify medical management if any inappropriate aspect of care is noted.  
48  
49  
50  
51  
52  
53  
54  
55  
56  
57  
58  
59  
60

223

224 Usual care

225 ICUs in the control group will continue with their usual management of  
226 potential organ donors. They will not be informed of the items assessed in the goal-  
227 directed checklist or the strategies to enhance compliance.

228

### 229 **Co-interventions**

230 All ICU teams and IHTC members of the participating institutions will receive  
231 training in family interviews for organ donation. The training and interview process  
232 have been based primarily on the Spanish model of Communication in Critical  
233 Situations (Online Supplementary File 4).[27-31] Training consists of two components:  
234 (1) face-to-face training of one ICU team representative and one IHTC member of each  
235 institution; and (2) provision of an online, self-instructional course for all ICU team  
236 members and IHTC members participating in the study (Table 1). These co-  
237 interventions aim to standardise ICU strategies in relation to family interviews, reducing  
238 variability between participating sites. This is important for the trial due to three main  
239 reasons: (a) inadequate interviews may result in a lower rate of effective donation  
240 (secondary outcomes of the study), independently of potential donor management; (b)  
241 reducing variability between participating sites may have an impact on reducing the  
242 intra-cluster correlation of the study, increasing its power; and (c) training strategies  
243 might enhance the engagement of the participating sites, especially those in the control  
244 group, thereby balancing a potential Hawthorne effect. Table 1 shows the strategies to  
245 promote effective implementation of intervention and co-intervention.

246

247 **Table 1.** Strategies to maximise adherence to study interventions and co-interventions.

---

**Strategies**

---

1. In-person training of two representatives (study co-ordinators) from each participating site on the conduct of family interviews.
  2. Provision of an online course for the training of all intensive care unit (ICU) team members and Intra-Hospital Transplant Co-ordination (IHTC) members on how to prepare for and conduct a family interview. A family interview support guide will also be made available.
  3. On-site training of ICU team members and IHTC members of all hospitals in the intervention group. The training aims to provide guidance on the methods for administration of the goal-directed checklist for the management of potential organ donors to as many ICU and IHTC professionals as possible.
  4. Monthly reports with the number of potential donors screened and included will send by electronic message, in the form of a newsletter, to all members of the health team comprising of professionals from the ICU and IHTC.
  5. The local co-ordinators of the participating sites will be contacted by the study central office co-ordinators whenever there is a failure to adhere to the protocol or to complete the patient's clinical record form.
  6. The local co-ordinators of the participating sites will receive, whenever a patient is included, electronic messages to remind them of the need to administer the bedside goal-directed checklist and prompt the medical team on management during the stay of potential organ donors in the ICU.
  7. Remote support from the study co-ordinators and central office will be made available to all local co-ordinators for any questions related to the study.
-



## 249 **Sample size**

250 With 60 ICUs, we will need to include 19 brain-dead potential organ donors  
251 per site (1,140 potential donors) to detect an absolute reduction of donor losses due to  
252 cardiac arrests of 10% (from 28% in the control group to 18% in the intervention  
253 group)[13], considering an intra-class correlation coefficient (ICC) of 0.05, power of  
254 80%, and a two-sided alpha level of 5%. Therefore, considering a possible variation in  
255 cluster size and its impact on statistical power, we intend to include a minimum of 60  
256 ICUs with at least 1,200 potential organ donors, not allowing more than 30 participants  
257 in each cluster.

## 259 **Randomisation**

260 We will randomly assign ICUs to the intervention group or control group with  
261 a 1:1 allocation ratio using blocks of variable sizes (2 and 4) and stratified by the  
262 estimated annual number of notifications of brain death in each site (sites with  $\leq 29$  and  
263  $> 29$ ). ICUs from the same institution are not considered independent clusters to avoid  
264 contamination. We will randomise the ICUs consecutively as per the date of  
265 authorisation of the principal investigator to implement the study in the institution,  
266 obtained after the Institutional Review Board (IRB) approval. To ensure allocation  
267 concealment, a statistician from the study co-ordinating office will be responsible for  
268 the randomisation process, with all researchers involved in the trial blinded to the  
269 allocation sequence.

## 271 **Outcomes**

272 The primary outcome will be the number of brain-dead potential organ donor  
273 losses due to cardiac arrest, defined as any loss of brain-dead potential organ donors

1  
2  
3 274 from irreversible or unreversed cardiac arrest that occurs after patient enrolment, while  
4  
5 275 the subject remains eligible for organ donation (no contraindications, family approval or  
6  
7 276 waiting family decision for donation). Losses of potential donors due to other factors  
8  
9  
10 277 (e.g., family refusal or contraindication to organ donation after patient inclusion) will  
11  
12 278 not be considered for this outcome.

13  
14 279 The secondary outcomes will be:

15  
16  
17 280 1) number of actual organ donors, indexed to brain-dead potential donors,  
18  
19 281 defined as donors for whom the surgical procedure for organ recovery has been initiated  
20  
21 282 (irrespective of organ recovery)[3];

22  
23  
24 283 2) number of solid organs recovered per actual donor (ranging from zero to  
25  
26 284 seven organs per donor, as follows: liver; heart; pancreas; two lungs; and two kidneys).

27  
28 285 The tertiary outcomes will include:

29  
30  
31 286 1) the proportion of potential donors with adequate respiratory parameters  
32  
33 287 (defined as  $\text{PaO}_2 / \text{FiO}_2$  ratio  $\geq 200$ );

34  
35 288 2) the proportion of potential donors with adequate body temperature (defined  
36  
37 289 as body temperature between 34°C and 35°C if haemodynamically stable and  $> 35^\circ\text{C}$  if  
38  
39 290 mean arterial pressure [MAP]  $< 65$  mm Hg or use of noradrenaline or dopamine);

40  
41  
42 291 3) the proportion of potential donors with adequate circulatory parameters  
43  
44 292 (inadequate parameters defined as MAP  $< 65$  mm Hg or dose of noradrenaline  $\geq 0.1$   
45  
46 293 mc/kg/min or dose of dopamine  $\geq 15$  mcg/kg/min);

47  
48  
49 294 4) organ dysfunction score, assessed by the Sequential Organ Failure  
50  
51 295 Assessment (SOFA) Score.

52  
53 296

54  
55  
56 297 **Blinding**

1  
2  
3 298 Due to the nature of the intervention, it will not be possible to blind  
4  
5 299 investigators or healthcare providers in this study. However, we will not disclose details  
6  
7  
8 300 of the content of the checklist to the control group.  
9

10 301

### 11 302 **Data collection**

12  
13  
14 303 An ICU healthcare professional or an IHTC member will collect the data,  
15  
16 304 which will be recorded at the patient's bedside using a printed case report form and  
17  
18 305 subsequently transferred into an electronic data capture system (REDCap, Vanderbilt  
19  
20 306 University, Tennessee, USA).[32] Investigators will receive training for these activities  
21  
22 307 during the study initiation meeting.  
23

24 308

### 25 309 **Data monitoring**

26  
27  
28 310 The study statistician will be responsible for reviewing weekly data on all  
29  
30 311 inclusions, checking data consistency, and checking whether all forms have been  
31  
32 312 completed correctly. Clinical research monitors will review all data collected and may  
33  
34 313 require supplementation or correction of inconsistent data according to the Good  
35  
36 314 Clinical Practices (GCP) recommended by the International Council for Harmonisation  
37  
38 315 (ICH).[33] On-site monitoring visits will take place after the fifth patient inclusion in  
39  
40 316 the site and when 100% of the projected number of inclusions for the site has been  
41  
42 317 achieved. Additional monitoring visits will be performed as needed, based on the  
43  
44 318 detection of data inconsistencies, errors in completing the forms, or suspected fraud.  
45  
46 319 Periodic remote follow-up will be performed via telephone or electronic messages with  
47  
48 320 the participating sites according to patient recruitment. The data to be collected from  
49  
50 321 each subject are summarised in Table 2.  
51  
52  
53  
54  
55  
56  
57  
58  
59  
60

1  
2  
3 322 **Table 2.** Data to be entered in the clinical record form of all potential organ donors  
4  
5 323 included in the study.  
6

- 
1. Identification of the potential donor: research centre code and patient's hospital registration number, sex, and date of birth.
  2. Screening: inclusion and exclusion criteria for definition of eligibility.
  3. History: date and time of hospital admission, date and time of ICU admission, reported and estimated weight, height, SAPS 3 on ICU admission, comorbidities prior to hospitalisation, cause of brain death, date and time of 1<sup>st</sup> clinical examination for the diagnosis of brain death.
  4. Respiratory variables: tidal volume, mL; respiratory rate, mpm; PEEP, cm H<sub>2</sub>O; plateau pressure, cm H<sub>2</sub>O; peak pressure, cm H<sub>2</sub>O (if volume is controlled); FiO<sub>2</sub>, %  
Blood gas variables: PaO<sub>2</sub>, mm Hg; SaO<sub>2</sub>, %; PaCO<sub>2</sub>, mm Hg; base excess, mmol/dL; PvO<sub>2</sub>, mm Hg; SvO<sub>2</sub>, %; PvCO<sub>2</sub>, mm Hg; lactate, mmol/dL.
  5. Temperature and haemodynamic variables: temperature, °C; heart rate, bpm; systolic blood pressure, mm Hg; diastolic blood pressure, mm Hg; CVP, mm Hg and/or ΔPp, % and/or ΔSV, % and/or IVCCI, %; cardiac arrhythmias.
  6. Diuresis and fluid balance: infused volume; diuresis and fluid balance at different time intervals.
  7. Laboratory variables: haemoglobin, g/dL; creatinine, mg/dL; platelets, /mm<sup>3</sup>; bilirubin, mg/dL; sodium, mEq/L; potassium, mEq/L; magnesium, mEq/L; phosphorus, mEq/L; calcium, mEq/L.
  8. Drug use: noradrenaline; dopamine; vasopressin; desmopressin; corticosteroids; antibiotics.
  9. Family interview: time, place and name of the professional communicating the establishment of a brain death protocol to the family; time, place and name of the
-

---

professional communicating the death to the family; time, place and name of the professional conducting the family interview with the request for organ donation; experience and qualification of the professional conducting the family interview with the request for organ donation; family authorization for organ donation; loss of potential donor due to family refusal; causes of family refusal.

10. Protocol completion: date and time of 2<sup>nd</sup> clinical examination for the diagnosis of brain death; date and time of a complementary test for the diagnosis of brain death; complementary test performed for the diagnosis of brain death.
11. Occurrence of cardiac arrest, loss of potential donor due to cardiac arrest, completion of organ harvesting, number and type of organs recovered.

---

324 CVP, central venous pressure;  $\Delta Pp$ , pulse pressure respiratory variation;  $\Delta SV$ , stroke  
325 volume respiratory variation;  $FiO_2$ , fraction of inspired oxygen; ICU, intensive care  
326 unit;  $PaO_2$ , arterial partial pressure of oxygen;  $PaCO_2$ , arterial partial pressure of carbon  
327 dioxide;  $PvO_2$ , venous partial pressure of oxygen;  $PvCO_2$ , venous partial pressure of  
328 carbon dioxide; PEEP, positive end-expiratory pressure; SAPS 3, Simplified Acute  
329 Physiology Score 3;  $SaO_2$ , arterial oxygen saturation;  $SvO_2$ , venous oxygen saturation;  
330 IVCCI, inferior vena cava collapsibility index.  
331

### 332 **Statistical analysis**

333 We will prepare a detailed statistical analysis plan before data analysis, which  
334 is intended to be published or made available online. We will perform the statistical  
335 analysis following the intention-to-treat principle, accounting for cluster design, with  
336 observations of the ICUs analysed according to the group to which they have been  
337 allocated. We will examine the normality of data by visual inspection of histograms and  
338 using the Shapiro–Wilk test for normality. Baseline characteristics of both the ICUs and  
339 potential organ donors will be presented as frequencies and percentages, means and  
340 standard deviation (SD), and medians and interquartile range (IQR), whenever  
341 appropriate, for the intervention group and control group.

1  
2  
3 342 For the primary outcome, we will calculate hazard ratios (HR) considering the  
4  
5 343 time to the outcome, since patients will be subjected to management at different time  
6  
7 344 intervals in the institutions. Patients will be considered at risk for the occurrence of the  
8  
9 345 outcome of interest while under consideration as potential donors. If the outcome of  
10  
11 346 interest does not occur, patients' follow-up will be considered to have ended at the time  
12  
13 347 their management has been discontinued (family refusal or contraindication to  
14  
15 348 donation). We will conduct predefined subgroup analyses, considering the following  
16  
17 349 variables: age > 60 years; cause of the injury leading to potential brain death (traumatic  
18  
19 350 or non-traumatic); and patient severity on ICU admission defined by the Simplified  
20  
21 351 Acute Physiology Score 3 (SAPS 3) with a cut-off determined by its median. We will  
22  
23 352 conduct sensitivity analyses of adherence to the intervention (compliance with checklist  
24  
25 353 proposed measures) and of the time interval between the first clinical examination  
26  
27 354 consistent with having brain death and inclusion in the study.  
28  
29  
30  
31

32  
33 355 For secondary and tertiary outcomes, we will use models for correlated data,  
34  
35 356 considering the ICU as a cluster and each outcome with its own probability distribution.  
36  
37 357 We will conduct a sensitivity analysis of the outcome 'number of solid organs recovered  
38  
39 358 per actual donor', considering the number of kidneys harvested. We will analyse  
40  
41 359 secondary outcomes by adjusting for multiple hypothesis testing. For all statistical  
42  
43 360 comparisons, we will adopt a statistical significance level of 0.05. An up-to-date version  
44  
45 361 of the R programme (R Development Core Team) will be used to conduct analyses.  
46  
47  
48

49 362

### 50 51 363 **Study planning and implementation schedule**

52  
53 364 We finalised the study design and protocol in March 2016. The National Study  
54  
55 365 Investigators Meetings were held in two parts: 9–10 March 2017 and 8–9 June 2017. At  
56  
57 366 the time of manuscript preparation, 63 ICUs representative of the Brazilian geopolitical  
58  
59  
60

1  
2  
3 367 territory are currently recruiting study subjects (Figure 3). On-site training started on  
4  
5 368 June 1, 2017. We expect that the recruitment will be completed in December 2019. The  
6  
7 369 list of sites included is available at ClinicalTrials.gov (NCT03179020).  
8  
9

10 370

### 11 371 **Organisational aspects of the study**

12  
13  
14 372 The study is sponsored and co-ordinated by the Moinhos de Vento Hospital,  
15  
16 373 Brazil, in partnership with the Brazilian Ministry of Health through the Programme of  
17  
18 374 Institutional Development of the Brazilian Unified Health System (PROADI-SUS) and  
19  
20 375 in association with the General Co-ordination Office of the National Transplant System  
21  
22 376 (CGSNT) and the Brazilian Research in Intensive Care Network (BRICNet). The study  
23  
24 377 is supported by the AMIB Committee for Organ Donation for Transplant, ABTO, the  
25  
26 378 Spanish National Transplant Organisation (ONT), and the organ procurement  
27  
28 379 organisations (OPOs) of the states of Santa Catarina and Rio Grande do Sul. The study  
29  
30 380 Steering Committee consists of intensivists, transplant co-ordinators and  
31  
32 381 epidemiologists with expertise in conducting multi-centre studies. The committee is  
33  
34 382 involved in the conception and design of the study, supervision of progress and  
35  
36 383 procedures during the study, and writing of the study report and any resulting study  
37  
38 384 manuscript.  
39  
40  
41  
42  
43  
44  
45

46 385

### 47 386 **Ethics and dissemination**

48  
49 387 The study was designed in accordance with resolution No. 466/2012 of the  
50  
51 388 Brazilian National Health Council/Ministry of Health, the Declaration of Helsinki, the  
52  
53 389 Document of the Americas, and the ICH/GCP E6(R2) 2016 [33]. The study was  
54  
55 390 approved by the IRB of the Co-ordinating Centre (No. 53999616.0.1001.5330) and by  
56  
57 391 the IRB of each participating site (Online Supplementary File 5). Participating in the  
58  
59  
60

1  
2  
3 392 intervention or control groups does not imply any risk for the subjects included, since  
4  
5 393 the groups will not be deprived of the application of the most up-to-date  
6  
7 394 recommendations. Because obtaining written informed consent from patients' family  
8  
9 395 members entails operational and methodological difficulties, and would have a potential  
10  
11 396 negative impact on organ donation as well, we requested a waiver of informed consent  
12  
13 397 for the IRB of each participating site.  
14  
15

16  
17 398 This trial, regardless of the results, will be published in a peer-reviewed  
18  
19 399 medical journal and presented in scientific conferences and scientific meetings  
20  
21 400 involving the representatives of each participating hospital, of each Brazilian state  
22  
23 401 transplant centre, and of the Brazilian Ministry of Health.  
24  
25

26 402

### 27 28 403 **Patient and Public Involvement**

29  
30 404 Considering the characteristics of the study population, the patients were not directly  
31  
32 405 involved in the research question, study design, study participants recruitment and study  
33  
34 406 conduction.  
35  
36

37 407

### 38 39 408 **DISCUSSION**

40  
41  
42 409 Despite the existence of CPGs that currently provide recommendations for a  
43  
44 410 'standard of care' in the management of potential organ donors,[23,29] they are not  
45  
46 411 always implemented, resulting in the risk of loss of specific organs due to management  
47  
48 412 failures or even multiple organ loss due to cardiac arrest of the potential donor.[1-4, 23,  
49  
50 413 34] CPGs usually do not have an impact on bedside practice in the short term, as they  
51  
52 414 rarely take into account clinical applicability.[35] Therefore, a CPG-based goal-directed  
53  
54 415 checklist associated with a clinician prompting system may be an effective approach to  
55  
56 416 improve physician adherence to CPG recommendations. Physician-centred healthcare  
57  
58  
59  
60



1  
2  
3 417 can be associated with non-adherence to basic recommendations of care, especially in  
4  
5 418 highly complex processes, such as the management of potential organ donors.[34] In  
6  
7 419 this context, we expect that these organisational adjustments, supported by a checklist-  
8  
9 420 based management strategy, will have a positive impact on organ donation.  
10  
11

12 421 Patel et al.[19] published the results of 671 multi-organ donors managed using  
13  
14 422 a goal-directed checklist in the United States. The predetermined goals were met in 45%  
15  
16 423 of cases prior to organ recovery, and the use of the goal-directed checklist significantly  
17  
18 424 increased the number of organs transplanted per donor.[19] Recently, we published a  
19  
20 425 prospective observational study that involved 27 ICUs in a southern Brazilian state  
21  
22 426 demonstrating that the use of a goal-directed checklist to guide the management of  
23  
24 427 deceased donors reduces brain-dead potential organ donor losses due to cardiac  
25  
26 428 arrest.[13] Compliance with the checklist increased after the start of the study from  
27  
28 429 52.1% to 85.8% ( $p < 0.001$ ). The use of the checklist was associated with a lower  
29  
30 430 likelihood of occurrence of cardiac arrest (odds ratio [OR]: 0.30, 95% CI: 0.18-0.49,  
31  
32 431  $p < 0.001$ ) and an increase in the number of organs recovered per donor.[13] Although  
33  
34 432 these results are encouraging and reproduce the observations of other authors, the  
35  
36 433 observational nature of the studies provides only weak evidence on the subject.[14-19]  
37  
38  
39

40 434 The study design and basis for the implementation of DONORS may provide  
41  
42 435 new insights that can help overcome the weaknesses of previous observational studies,  
43  
44 436 often related with barriers to conduct studies in deceased organ donors.[5] The cluster  
45  
46 437 randomisation design will limit selection biases, and we will count on a large number of  
47  
48 438 ICUs, which are responsible for a significant amount of brain death notifications  
49  
50 439 throughout Brazil. The DONORS design will include the evaluation of the effectiveness  
51  
52 440 of a goal-directed checklist strategy in different socioeconomic scenarios in Brazil,  
53  
54 441 allowing us to provide real-world evidence to support the practical clinical applicability  
55  
56  
57  
58  
59  
60

1  
2  
3 442 of the study findings. In addition, the trial is testing the effectiveness of the proposed  
4  
5 443 intervention by means of an implementation strategy that may be considered feasible to  
6  
7 444 replicate in different settings. Finally, the characteristics of the institutional quality  
8  
9 445 improvement programme of this protocol will allow the potential benefits generated by  
10  
11 446 the proposed study model to be incorporated into ICUs and ultimately transferred to  
12  
13 447 other clinical areas for the care of critically ill patients.  
14  
15

16  
17 448 The implementation of a goal-directed checklist for the management of  
18  
19 449 potential donors is a complex intervention, with multiple components. It is important to  
20  
21 450 state that, as in most quality improvement studies, how the intervention is implemented  
22  
23 451 is crucial to the interpretation of the results. In this respect, through this protocol, we  
24  
25 452 aimed to describe in detail all the interventions and co-interventions proposed in the  
26  
27 453 study in order to allow reproducibility of our procedures in other settings. In addition,  
28  
29 454 the logic model presented in the study (Figure 2) is intended to explore the relationships  
30  
31 455 between the activities proposed in the intervention and the mediators of the effect, such  
32  
33 456 as improved clinical management of potential donors and enhanced communication  
34  
35 457 with the ICU team about the expected outcomes. Also important is that, although the  
36  
37 458 study focuses on assessing short-term outcomes in potential donors (e.g., cardiac arrest  
38  
39 459 and number of organs recovered), potential beneficial outcomes are expected for  
40  
41 460 transplant recipients, such as improved graft function, survival and quality of life.  
42  
43  
44  
45

46  
47 461 Our study has some limitations. First, high variability in care and outcomes  
48  
49 462 among institutions is expected. Although the chosen ICC may be considered  
50  
51 463 conservative, there are no estimates in the literature for the proposed intervention, which  
52  
53 464 may result in lack of power if the actual ICC is larger than the estimate. In spite of the  
54  
55 465 procedures to avoid the transfer of information about the checklist to ICUs in the  
56  
57 466 control group, although with low probability this possibility should be considered,  
58  
59  
60

1  
2  
3 467 thereby exposing the details of the content of the goal-directed checklist for the control  
4  
5 468 group. Furthermore, although stratified randomisation is planned for this study, we must  
6  
7 469 take into consideration the differences in the number of brain death notifications among  
8  
9 470 ICUs, which will recruit patients at different rates, which in turn may generate learning  
10  
11 471 curves that may have an impact on the final cluster randomisation trial results. In order  
12  
13 472 to minimise this problem, we are allowing a maximum of 30 patients to be recruited per  
14  
15 473 each study site; however, some ICUs may recruit a small number of patients. Inadequate  
16  
17 474 adherence to the checklist may have an impact on the results observed in the  
18  
19 475 intervention group, showing no effect that may be either due to lack of efficacy of the  
20  
21 476 intervention or due to its suboptimal implementation. Another important aspect to  
22  
23 477 highlight is that, although we expect to see an improvement in the quality of organs  
24  
25 478 with the use of the checklist, therefore improving outcomes for organ-transplant  
26  
27 479 recipients, we are limiting the data collection and study procedures to potential donors,  
28  
29 480 not allowing direct assumptions about its possible effects. Finally, a possible variability  
30  
31 481 in the care of patients with catastrophic brain injury (CBI), before its evolution to brain  
32  
33 482 death, may occur among the study sites. On the other hand, the results may contribute as  
34  
35 483 an indirect evidence for the management of patients who have a CBI.  
36  
37  
38  
39  
40  
41  
42  
43

## 44 485 **CONCLUSIONS**

46 486 We expect that the results from DONORS will provide information regarding  
47  
48 487 the practical use of checklist-guided management interventions for potential multi-organ  
49  
50 488 donors that may contribute to reducing potential donor losses due to cardiac arrest or  
51  
52 489 other relevant outcomes. At this time, with the increasing demand for organs for  
53  
54 490 transplantation, standardised, evidence-based guidelines that may be adopted globally  
55  
56 491 by ICUs and by transplant co-ordinators are needed to improve the availability and  
57  
58  
59  
60

1  
2  
3  
4  
5  
6  
7  
8  
9  
10  
11  
12  
13  
14  
15  
16  
17  
18  
19  
20  
21  
22  
23  
24  
25  
26  
27  
28  
29  
30  
31  
32  
33  
34  
35  
36  
37  
38  
39  
40  
41  
42  
43  
44  
45  
46  
47  
48  
49  
50  
51  
52  
53  
54  
55  
56  
57  
58  
59  
60

492 quality of organs available for donation. The evidence generated by this trial will have  
493 great potential to contribute positively to the donation of organs.

For peer review only

494 **REFERENCES**

- 495 1. The Madrid resolution on organ donation and transplantation: national responsibility  
496 in meeting the needs of patients, guided by the WHO principles. *Transplantation*  
497 2011;91 Suppl 11:S29-31. doi: 10.1097/01.tp.0000399131.74618.a5
- 498 2. Tullius SG, Rabb H. Improving the Supply and Quality of Deceased-Donor Organs  
499 for Transplantation. *N Engl J Med* 2018;378:1920-9. doi: 10.1056/NEJMra1507080
- 500 3. Dominguez-Gil B, Delmonico FL, Shaheen FA, et al. The critical pathway for  
501 deceased donation: reportable uniformity in the approach to deceased donation. *Transpl*  
502 *Int* 2011;24:373-8. doi: 10.1111/j.1432-2277.2011.01243.x
- 503 4. DuBose J, Salim A. Aggressive organ donor management protocol. *J Intensive Care*  
504 *Med* 2008;23:367-75. doi: 10.1177/0885066608324208
- 505 5. National Academies of Sciences, Engineering, and Medicine. Opportunities for organ  
506 donor intervention research: Saving lives by improving the quality and quantity of  
507 organs for transplantation. Washington, DC: *The National Academies Press*. 2017. doi:  
508 10.17226/24884.
- 509 6. Mascia L, Pasero D, Slutsky AS, et al. Effect of a lung protective strategy for organ  
510 donors on eligibility and availability of lungs for transplantation: a randomized  
511 controlled trial. *JAMA* 2010;304:2620-7. doi: 10.1001/jama.2010.1796
- 512 7. Niemann CU, Feiner J, Swain S, et al. Therapeutic Hypothermia in Deceased Organ  
513 Donors and Kidney-Graft Function. *N Engl J Med* 2015;373:405-14. doi:  
514 10.1056/NEJMoa1501969
- 515 8. Haynes AB, Weiser TG, Berry WR, et al. A surgical safety checklist to reduce  
516 morbidity and mortality in a global population. *N Engl J Med* 2009;360:491-9. doi:  
517 10.1056/NEJMsa0810119

- 1  
2  
3 518 9. Pronovost P, Needham D, Berenholtz S, et al. An intervention to decrease catheter-  
4  
5 519 related bloodstream infections in the ICU. *N Engl J Med* 2006;355:2725-32. doi:  
6  
7 520 10.1056/NEJMoa061115  
8  
9  
10 521 10. Weiss CH, Moazed F, McEvoy CA, et al. Prompting physicians to address a daily  
11  
12 522 checklist and process of care and clinical outcomes: a single-site study. *Am J Respir*  
13  
14 523 *Crit Care Med* 2011;184:680-6. doi: 10.1164/rccm.201101-0037OC  
15  
16  
17 524 11. Writing Group for the Checklist-ICU and the Brazilian Research in Intensive Care  
18  
19 525 Network. Effect of a Quality Improvement Intervention With Daily Round Checklists,  
20  
21 526 Goal Setting, and Clinician Prompting on Mortality of Critically Ill Patients: A  
22  
23 527 Randomized Clinical Trial. *JAMA* 2016;315:1480-90. doi: 10.1001/jama.2016.3463  
24  
25  
26 528 12. Westphal GA, Zaclikevis VR, Vieira KD, et al. A managed protocol for treatment of  
27  
28 529 deceased potential donors reduces the incidence of cardiac arrest before organ explant.  
29  
30 530 *Rev Bras Ter Intensiva* 2012;24:334-40. doi: 10.1590/S0103-507X2012000400007  
31  
32  
33 531 13. Westphal GA, Coll E, de Souza RL, et al. Positive impact of a clinical goal-directed  
34  
35 532 protocol on reducing cardiac arrests during potential brain-dead donor maintenance.  
36  
37 533 *Crit Care* 2016;20:323. doi: 10.1186/s13054-016-1484-1  
38  
39  
40 534 14. Helms AK, Torbey MT, Hacein-Bey L, et al. Standardized protocols increase organ  
41  
42 535 and tissue donation rates in the neurocritical care unit. *Neurology* 2004;63:1955-7. doi:  
43  
44 536 10.1212/01.WNL.0000144197.06562.24  
45  
46  
47 537 15. Franklin GA, Santos AP, Smith JW, et al. Optimization of donor management goals  
48  
49 538 yields increased organ use. *Am Surg* 2010;76:587-94.  
50  
51 539 16. Malinoski DJ, Daly MC, Patel MS, et al. Achieving donor management goals before  
52  
53 540 deceased donor procurement is associated with more organs transplanted per donor. *J*  
54  
55 541 *Trauma* 2011;71:990-5; discussion 6. doi: 10.1097/TA.0b013e31822779e5  
56  
57  
58  
59  
60

- 1  
2  
3 542 17. Salim A, Velmahos GC, Brown C, et al. Aggressive organ donor management  
4  
5 543 significantly increases the number of organs available for transplantation. *J Trauma*  
6  
7 544 2005;58:991-4. doi: 10.1097/01.TA.0000168708.78049.32  
8  
9  
10 545 18. Malinoski DJ, Patel MS, Daly MC, et al. The impact of meeting donor management  
11  
12 546 goals on the number of organs transplanted per donor: results from the United Network  
13  
14 547 for Organ Sharing Region 5 prospective donor management goals study. *Crit Care Med*  
15  
16 548 2012;40:2773-80. doi: 10.1097/CCM.0b013e31825b252a  
17  
18  
19 549 19. Patel MS, Zatarain J, De La Cruz S, et al. The impact of meeting donor management  
20  
21 550 goals on the number of organs transplanted per expanded criteria donor: a prospective  
22  
23 551 study from the UNOS Region 5 Donor Management Goals Workgroup. *JAMA Surg*  
24  
25 552 2014;149:969-75. doi: 10.1001/jamasurg.2014.967  
26  
27  
28 553 20. Chan AW, Tetzlaff JM, Altman DG, et al. SPIRIT 2013 statement: defining  
29  
30 554 standard protocol items for clinical trials. *Ann Intern Med* 2013;158:200-7. doi:  
31  
32 555 10.7326/0003-4819-158-3-201302050-00583  
33  
34  
35 556 21. Wijdicks EF, Varelas PN, Gronseth GS, et al. Evidence-based guideline update:  
36  
37 557 determining brain death in adults: report of the Quality Standards Subcommittee of the  
38  
39 558 American Academy of Neurology. *Neurology* 2010;74:1911-8. doi:  
40  
41 559 10.1212/WNL.0b013e3181e242a8  
42  
43  
44 560 22. Brasil. Conselho Federal de Medicina. Resolução CFM 2.173, 15/12/2017  
45  
46 561 [Internet]. [cited 2018 Jul 24]. Available from:  
47  
48 562 [http://www.saude.rs.gov.br/upload/arquivos/carga20171205/19140504-resolucao-do-](http://www.saude.rs.gov.br/upload/arquivos/carga20171205/19140504-resolucao-do-conselho-federal-de-medicina-2173-2017.pdf)  
49  
50 563 [conselho-federal-de-medicina-2173-2017.pdf](http://www.saude.rs.gov.br/upload/arquivos/carga20171205/19140504-resolucao-do-conselho-federal-de-medicina-2173-2017.pdf).  
51  
52  
53 564 23. Westphal GA, Caldeira Filho M, Fiorelli A, et al. Guidelines for maintenance of  
54  
55 565 adult patients with brain death and potential for multiple organ donations: the Task  
56  
57 566 Force of the Brazilian Association of Intensive Medicine the Brazilian Association of  
58  
59  
60

- 1  
2  
3 567 Organs Transplantation, and the Transplantation Center of Santa Catarina. *Transplant*  
4  
5 568 *Proc* 2012;44:2260-7. doi: 10.1016/j.transproceed.2012.07.019  
6  
7 569 24 Guyatt G, Oxman AD, Akl EA, et al. GRADE guidelines: 1. Introduction-GRADE  
8  
9 570 evidence profiles and summary of findings tables. *J Clin Epidemiol* 2011; 64:383-94.  
10  
11 571 doi: 10.1016/j.jclinepi.2010.04.026  
12  
13 572 25 Macdonald PS, Aneman A, Bhonagiri D et al. A systematic review and meta-  
14  
15 573 analysis of clinical trials of thyroid hormone administration to brain dead potential  
16  
17 574 organ donors. *Crit Care Med* 2012; 40:1635-44. doi: 10.1097/CCM.0b013e3182416ee7  
18  
19 575 26 Rech TH, Moraes RB, Crispin D, et al. Management of the brain-dead organ donor:  
20  
21 576 a systematic review and meta-analysis. *Transplantation* 2013; 95: 966-74. doi:  
22  
23 577 10.1097/TP.0b013e318283298e  
24  
25 578 27. Rech TH, Rodrigues Filho EM. [Family approach and consent for organ donation].  
26  
27 579 *Rev Bras Ter Intensiva* 2007;19:85-9. doi: 10.1590/S0103-507X2007000100011  
28  
29 580 28. Vincent A, Logan L. Consent for organ donation. *Br J Anaesth* 2012;108 Suppl  
30  
31 581 1:i80-7. doi: 10.1093/bja/aer353  
32  
33 582 29. Gobierno de España. Organización Nacional de Trasplantes. Comunicación en  
34  
35 583 situaciones críticas [Internet]. [cited 2018 Jul 24]. Available from:  
36  
37 584 [http://agora.ceem.org.es/wp-](http://agora.ceem.org.es/wp-content/uploads/documentos/bioetica/comunicacionensituacionescriticasONT.pdf)  
38  
39 585 [content/uploads/documentos/bioetica/comunicacionensituacionescriticasONT.pdf](http://agora.ceem.org.es/wp-content/uploads/documentos/bioetica/comunicacionensituacionescriticasONT.pdf).  
40  
41 586 30. Lautrette A, Darmon M, Megarbane B, et al. A communication strategy and  
42  
43 587 brochure for relatives of patients dying in the ICU. *N Engl J Med* 2007;356:469-78. doi:  
44  
45 588 10.1056/NEJMoa063446  
46  
47 589 31. Curtis JR, Patrick DL, Shannon SE, et al. The family conference as a focus to  
48  
49 590 improve communication about end-of-life care in the intensive care unit: opportunities  
50  
51 591 for improvement. *Crit Care Med* 2001;29:N26-33.  
52  
53  
54  
55  
56  
57  
58  
59  
60



- 1  
2  
3 592 32. Harris PA, Taylor R, Thielke R, et al. Research electronic data capture (REDCap)--a  
4  
5 593 metadata-driven methodology and workflow process for providing translational research  
6  
7 594 informatics support. *J Biomed Inform* 2009;42:377-81. doi: 10.1016/j.jbi.2008.08.010  
8  
9  
10 595 33. International conference on harmonisation of technical requirements for registration  
11  
12 596 of pharmaceuticals for human use. ICH Harmonised Tripartite Guideline. Guideline for  
13  
14 597 good clinical practice. E6(R1) [Internet]. [cited 2018 Nov 12]. Available from:  
15  
16 598 [https://www.ich.org/fileadmin/Public\\_Web\\_Site/ICH\\_Products/Guidelines/Efficacy/E6/  
17  
18 599 E6\\_R1\\_Guideline.pdf](https://www.ich.org/fileadmin/Public_Web_Site/ICH_Products/Guidelines/Efficacy/E6/E6_R1_Guideline.pdf)  
19  
20  
21 600 34. Cabana MD, Rand CS, Powe NR, et al. Why don't physicians follow clinical  
22  
23 601 practice guidelines? A framework for improvement. *JAMA* 1999;282:1458-65. doi:  
24  
25 602 10.1001/jama.282.15.1458  
26  
27  
28 603 35. Shemie SD, Ross H, Pagliarello J, et al. Organ donor management in Canada:  
29  
30 604 recommendations of the forum on Medical Management to Optimize Donor Organ  
31  
32 605 Potential. *CMAJ* 2006;174:S13-32. doi: 10.1503/cmaj.045131  
33  
34  
35  
36  
37  
38  
39  
40  
41  
42  
43  
44  
45  
46  
47  
48  
49  
50  
51  
52  
53  
54  
55  
56  
57  
58  
59  
60

1  
2  
3 606 **Authors' contributions**  
4

5 607 All authors contributed to the study design and revised this manuscript: GAW, CCR,  
6  
7 608 ABC, FRM, RGR, CT, JA, CAF, LCPA, FAB, CMG, DBS, DS, DZP, ICM, AIR, SSS,  
8  
9 609 NEG, LVA, PSB, FRR, MFRBM, TBP, CMCG, PCD, JFPO, GCM, FACA, RBM, VN,  
10  
11 610 LSH, MOM, RRN, and MF. Additionally, GAW, FRM, and ABC conceived the study,  
12  
13 611 RGR, CT, LCPA, FAB, LSH, and MF also helped with the study design, and GAW  
14  
15 612 drafted the first version of the article. JA, CAF, and RRN, helped with centre  
16  
17 613 recruitment and with the co-intervention aspects. GAW, JA, CMG and DBS co-  
18  
19 614 ordinated educational actions for the intervention. NEG, DS, MF, RGR, CCR, and ABC  
20  
21 615 planned epidemiological and statistical aspects of the study, CMG, ICM, and DZP  
22  
23 616 designed the study manuals and study tools, ICM and CMG led site management, ICM,  
24  
25 617 LAV, CMG, AIR, and SSS visited all sites to provide training, and CCR, ICM, CMG,  
26  
27 618 PSB, and DZP organized the study meetings. All authors read and approved the final  
28  
29 619 manuscript.  
30  
31  
32  
33  
34

35 620  
36  
37 621 **Funding statement:** This research was funded by the Brazilian Ministry of Health  
38  
39 622 through the Programme of Institutional Development of the Brazilian Unified Health  
40  
41 623 System (PROADI-SUS).  
42  
43  
44

45 624  
46  
47 625 **Competing interests statement:** The authors have no conflicts of interest to disclose.  
48

49 626  
50  
51 627 **Data sharing**  
52

53 628 The datasets used and/or analysed during the current study will be available from the  
54  
55 629 corresponding author on reasonable request.  
56  
57  
58  
59  
60

1  
2  
3 630 **Acknowledgements:** The authors would like to thank the data collection team of each  
4  
5 631 participating ICU, as well as the Moinhos de Vento Hospital (the Co-ordinating Centre),  
6  
7 632 the Brazilian Ministry of Health, the Brazilian Research in Intensive Care Network  
8  
9 633 (BRICNet), the General Co-ordination Office of the National Transplant System  
10  
11 634 (CGSNT), the Committee for Organ Donation for Transplant of the Brazilian  
12  
13 635 Association of Intensive Care Medicine (AMIB), the Brazilian Association of Organ  
14  
15 636 Transplantation (ABTO) for their support in conducting the study, and the professionals  
16  
17 637 who provided the training in family interviews for organ donation: Aline Ghellere,  
18  
19 638 Charlene Verusa da Silva, Dagoberto Franca da Rocha, Eduardo Jardim Berbigier,  
20  
21 639 Edvaldo Leal de Moraes, Felipe Pfuetzenreiter, Leonardo Borges de Barros e Silva,  
22  
23 640 Luana Cristina Heberle dos Santos, Lucia Maria Del Carmen Segovia Gomes, Neide da  
24  
25 641 Silva Knihs, and Paulo Ricardo Cardoso.  
26  
27  
28  
29  
30  
31  
32  
33  
34  
35  
36  
37  
38  
39  
40  
41  
42  
43  
44  
45  
46  
47  
48  
49  
50  
51  
52  
53  
54  
55  
56  
57  
58  
59  
60

1  
2  
3 642 **FIGURE LEGENDS**  
4

5 643 **Figure 1.** Study flow diagram.  
6

7  
8 644 IRB, Institutional Review Board; No., number  
9

10 645 **Figure 2.** Logic model for the checklist intervention.  
11

12 646 **Figure 3.** Geographical distribution of the participating intensive care units in Brazil.  
13

14 647 (map base copyright obtained from [www.gettyimages.pt](http://www.gettyimages.pt)).  
15  
16  
17  
18  
19  
20  
21  
22  
23  
24  
25  
26  
27  
28  
29  
30  
31  
32  
33  
34  
35  
36  
37  
38  
39  
40  
41  
42  
43  
44  
45  
46  
47  
48  
49  
50  
51  
52  
53  
54  
55  
56  
57  
58  
59  
60

For peer review only

1  
2  
3 648 \* **DONORS (Donation Network for Organ Recovery Study) Investigators and the**  
4  
5 649 **BRICNet collaborators:** Jose Luis Toribio Cuadra, Caroline Luciane de Oliveira,  
6  
7 650 Gabriela Rech and Bruna dos Passos Gimenes. Hospital de Urgência e Emergência de  
8  
9 651 Rio Branco (AC): Iris de Lima Ferraz Siqueira, Aldo Damian Chambi Garrido, Gigliane  
10  
11 652 Maria Angelim de Albuquerque, and Régis Augusto Hashimoto. Hospital das Clínicas  
12  
13 653 de Rio Branco (AC): Mateus Roza Teles, Rosely Barreiros Cruz, and Nelson Antônio  
14  
15 654 Carneiro Pinheiro Júnior. Hospital Geral Prof. Osvaldo Brandão Vilela (AL): Janaína  
16  
17 655 Maria Miranda Ferreira de Moraes, Claudete Maria Balzan, Lúcia Regina Arana Leite,  
18  
19 656 and Lis Daniela Pinto Oliveira. Hospital de Pronto Socorro João Paulo II (RO): Edwin  
20  
21 657 Fanola Novillo, Maxwendell Gomes Batista, and Silvecler Cortijo de Campos. Hospital  
22  
23 658 de Pronto Socorro Dr. João Lúcio Pereira Machado (AM): Marcelo Souza Ferreira,  
24  
25 659 Helen Figueiredo, Nathalia Cristina Moraes, and Paulo Henrique Lira Matos. Hospital  
26  
27 660 de Urgência de Sergipe (SE): Janaína Feijó, Dernivania de Andrade Ferreira, Ana Paula  
28  
29 661 Rocha Barrel Machado, and Poliana Nunes Santos. Hospital Geral Cleriston Andrade  
30  
31 662 (BA): Lúcio Couto de Oliveira Júnior, Felipe Ferreira Ribeiro de Souza, Daniela Cunha  
32  
33 663 de Oliveira, and Graças de Maria Dias Reis. Hospital Instituto Dr. José Frota (CE): Ana  
34  
35 664 Virgínia Rolim, Lisiane Paiva Alencar, Samira Rocha Magalhães, and Eliana Regia  
36  
37 665 Barbosa de Almeida. Hospital Geral de Fortaleza (CE): Joel Isidoro Costa, Larissa  
38  
39 666 Salles Pontes Carneiro, and Márcia Maria Vitorino Sampaio Passos. Hospital Regional  
40  
41 667 do Cariri (CE): Gustavo Martins dos Santos, José Wagner Brito de Souza, and Bruna  
42  
43 668 Bandeira Oliveira Marinho. Irmandade Santa Casa de Misericórdia de Sobral (CE): Luiz  
44  
45 669 Derwal Salles Júnior, José Henrique Gurgel, Iranildo Passos Fontenele, and Layanny  
46  
47 670 Teles Linhares Bezerra. Hospital Regional Norte (CE): Francisco Olon Leite Júnior,  
48  
49 671 Israel Ferreira da Costa, Diego Bruno Santos Pinheiro, and Denise Martins de Moura.  
50  
51 672 Hospital Regional Tarcísio de Vasconcelos Maia (RN): Fernando Albuerne Bezerra,  
52  
53  
54  
55  
56  
57  
58  
59  
60

- 1  
2  
3 673 Suzana Cantidio, Jéssica Patrícia Saraiva Medeiros Lima Moreira, and Bruna de Sousa  
4  
5 674 Carvalho. Hospital Alberto Urquiza Wanderley (PB): Ciro Leite Mendes, Igor  
6  
7 675 Mendonça do Nascimento, and Juliana Sousa Dias. Hospital Municipal Djalma  
8  
9 676 Marques (MA): Alexandre Augusto Gomes Alves, Heloisa Rosário Furtado Oliveira  
10  
11 677 Lima, Silvia Helena Cardoso de Araújo Carvalho, and Clayton Aragão Magalhães.  
12  
13 678 Hospital Dr. Carlos Macieira (MA): Marko Antônio Santos, Luiza Maria de Novoa  
14  
15 679 Moraes, Lea Barroso Coutinho Pereira, and Henrique Lott Carvalho Novaes Sobrinho.  
16  
17 680 Hospital da Restauração (PE): Sylvia Helena Araújo Lima Siqueira, and Janaína  
18  
19 681 Rodrigues da Silva. Hospital de Ensino Doutor Washington Antônio de Barros (PE):  
20  
21 682 Samyra Pereira de Moraes, Janaína Correia Walfredo Carvalho, and Kátia Regina de  
22  
23 683 Oliveira. Hospital de Base do Distrito Federal (DF): Luiz Hamilton da Silva, Viviane  
24  
25 684 Marçal da Silva, and Camila Vieira Hirata. Hospital Estadual de Urgência e Emergência  
26  
27 685 de Vitória (ES): Jander Pissinate Fornaciari, Ana Paula Neves Curty, Ivens Guimarães  
28  
29 686 Soares, and Leandro de Oliveira Ferreira. Hospital de Urgência de Goiânia (GO):  
30  
31 687 Alexandre Amaral, Guilherme Ono de Gouvêa, and Ana Paula Cordeiro de Menezes  
32  
33 688 Silveira. Hospital João XXIII (MG): Frederico Bruzzi de Carvalho, Natasha Preis  
34  
35 689 Ferreira, Sylmara Jenifer Zandona Freitas, Fernanda Coura Pena de Sousa, and Laura  
36  
37 690 Chen. Hospital das Clínicas da Universidade Federal de Minas Gerais (MG): Christiane  
38  
39 691 de Freitas Morrão Helt Mantuano Pereira, and Amélia Cristina Gomes. Hospital  
40  
41 692 Universitário Ciências Médicas (MG): Jeova Ferreira de Oliveira, Marcela Leandro  
42  
43 693 Baldow, and Rodrigo Santana Dutra. Irmandade Santa Casa de Misericórdia de Belo  
44  
45 694 Horizonte (MG): Mara Rubia de Moura, Claudio Dornas de Oliveira, Andressa Siuves  
46  
47 695 Moreira, and Marina Ferreira de Oliveira. Santa Casa de Campo Grande (MS): Patrícia  
48  
49 696 Berg Gonçalves Pereira Leal, Ana Paula Silva das Neves, Rodrigo Correa Gomes da  
50  
51 697 Silva, and Márcia Heloisa Flores. Hospital Municipal Padre Germano Lauck (PR):  
52  
53  
54  
55  
56  
57  
58  
59  
60

1  
2  
3 698 Roberto de Almeida, Karin Aline Zili Couto, Alexsandro José dos Santos Fernandes,  
4  
5 699 and Carla Fabíola Carvalho. Hospital Evangélico de Londrina (PR): Elizabeth Regina  
6  
7 700 de Jesus Capelo Frois, Ana Luiza Mezaroba, and Josiane Festti. Hospital Universitário  
8  
9  
10 701 Regional dos Campos Gerais (PR): Thomas Markus Dhaese, Simone Macedo Hanke,  
11  
12 702 and Guilherme Arcaro. Hospital Bom Jesus de Ponta Grossa (PR): Maikel Ramthun,  
13  
14 703 Jullye Christine Pereira Tomacheski, César Flores, and Patrícia Bertoncini Cwiertnia.  
15  
16 704 Hospital Universitário de Cascavel do Oeste do Paraná (PR): Péricles Duarte, Elaine  
17  
18 705 Fátima Padilha, Cleber Tchaicka, and Lizandra de Oliveira Ayres. Hospital  
19  
20 706 Universitário Regional do Norte do Paraná (PR): Sheila Esteves Farias, Marcos  
21  
22 707 Toshiyuki Tanita, and Lucienne Tibery Queiroz Cardoso. Hospital Universitário de  
23  
24 708 Maringá (PR): Almir Germano, Catia Milene Dell’Agnolo, and Rosane Almeida de  
25  
26 709 Freitas. Irmandade Santa Casa de Misericórdia de Maringá (PR): Ellen Sotti Barbosa,  
27  
28 710 Vanessa Martim Mezzavila, and Pedro Rigon Junior. Hospital Bom Jesus de Toledo  
29  
30 711 (PR): Itamar Weiwanko, Cristiano Morginski, and Waldir Antonio Pasa Junior. Hospital  
31  
32 712 Nossa Senhora do Rocio de Campo Largo (PR): Ricardo Gustavo Zill Risson, Fernanda  
33  
34 713 Gabriella Barbosa Santos, and Mayara Ferreira Vieira. Hospital e Maternidade Angelina  
35  
36 714 Caron (PR): Tatiana Euclides Cassolli, Mariana Pramio Singer, Rosiane de Oliveira  
37  
38 715 Pereira, and Jaciara Ribeiro de Oliveira. Hospital Santa Rita de Maringá (PR): Melina  
39  
40 716 Almeida Slemer Lemos, Vivianne Cristina Boaretto Toniol, and Mariza Aparecida de  
41  
42 717 Souza. Hospital Norte Paranaense (PR): Ângelo Yassushi Hayashi, Priscila Lisane de  
43  
44 718 Lima de Paula, and Elza de Lara Bezerra. Hospital São Vicente de Paulo Guarapuava  
45  
46 719 (PR): Fernanda Grossmann Ziger Borges, Elaine Silva Ramos, Cibele Aparecida  
47  
48 720 Marochi, and Jessyca Braga. Hospital Geral de Nova Iguaçu (RJ): Alexander de  
49  
50 721 Oliveira Sodré, Letícia Alves Pereira Entrago, Thiago Matos Barcelos, and Roberta  
51  
52 722 Carvalho de Jesus. Hospital Estadual Getúlio Vargas (RJ): Vitor Montez, Mônica  
53  
54  
55  
56  
57  
58  
59  
60

- 1  
2  
3 723 Silvina França da Silva de Melo, Tais Cristina Benites Vaz, and Vladimir dos Santos.  
4  
5 724 Hospital Bruno Born (RS): Fábio Fernandes Cardoso, Lucas Mallmann, Adriana Calvi,  
6  
7 725 and Nelson Barbosa Franco Neto. Hospital Cristo Redentor (RS): Manoel Nelson de  
8  
9 726 Oliveira Silveira, Deisi Fonseca, and Susana Santini. Irmandade da Santa Casa de  
10  
11 727 Misericórdia de Porto Alegre (RS): Edison Moraes Rodrigues Filho, Fernanda Paiva  
12  
13 728 Bonow, Ruth Susin, and Kellen Patrícia Mayer Machado. Hospital de Pronto Socorro  
14  
15 729 Nelson Marchezan (RS): Danielle Molardi de Aguiar, Caroline Salim Scheneider,  
16  
17 730 Lidiane Couto Braz, and Carlos Francisco Pereira do Bem. Hospital de Clínicas de  
18  
19 731 Porto Alegre (RS): Tatiana Helena Rech, and Edison Moraes Rodrigues Filho. Hospital  
20  
21 732 de Pronto Socorro de Porto Alegre (RS): Vivian Wuerges de Aquino, Fernando  
22  
23 733 Bourscheit, Luciano Marini. Hospital Universitário São Francisco de Paula (RS):  
24  
25 734 Bianca Rodrigues Orlando, Luciano de Oliveira Teixeira, Silvia Zluhan Bizarro, and  
26  
27 735 Viviani Aspirot Mendonça. Hospital São Vicente de Paulo (RS): José Oliveira Calvete,  
28  
29 736 Lina Maito, Sabrina Frighetto Henrich, and Larissa Assunta Pellizzaro. Hospital  
30  
31 737 Universitário São Francisco da Providência de Deus de Bragança Paulista (SP): Thiago  
32  
33 738 Corsi Filiponi, Felipe Fernandes Pires Barbosa, and Flávia Gozzoli. Casa de Saúde de  
34  
35 739 Santos (SP): André Scazufka Ribeiro, Paulo Henrique Penha Rosateli, Zeher Mohamad  
36  
37 740 Waked, and Ana Paula Quintal. Hospital de Base de São José do Rio Preto (SP): Suzana  
38  
39 741 Margareth Ajeje Lobo, Regiane Sampaio, Marcos Morais, James da Luz Rol, and  
40  
41 742 Luciana da Silva Ferreira. Hospital das Clínicas de Botucatu (SP): Laercio Martins de  
42  
43 743 Stefano, Marina Acosta Cleto, Silvia Eduara Kenrnely, and Cintia Banin. Hospital  
44  
45 744 Municipal Irmã Dulce (SP): Maria Odila Gomes Douglas, Renato Luis Borba, Daniela  
46  
47 745 Boni, and Eliza Maria Prado Monteiro. Hospital Paulistano (SP): Airton Leonardo de  
48  
49 746 Oliveira Manoel, Ciro Parioto Neto, and Siderleny Casari Martins. Hospital das Clínicas  
50  
51 747 da Faculdade de Medicina de Ribeirão Preto (SP): Wilson José Lovato, Marcelo  
52  
53  
54  
55  
56  
57  
58  
59  
60



- 1  
2  
3 748 Bonvento, Rodrigo Barbosa Cerantola, and Leonardo Carvalho Palma. Hospital  
4  
5 749 Beneficência Portuguesa de São Paulo (SP): Salomon Ordinola Rojas, Viviane Cordeiro  
6  
7 750 Veiga, Raquel Telles, and Phillipe Travassos. Irmandade da Santa Casa de Misericórdia  
8  
9  
10 751 de São Paulo (SP): Roberto Marco, Fabiano Hirata, Cinthia Consolin Vieira, and Ligia  
11  
12 752 Peraza. Hospital São Paulo (SP): Miriam Jackiu, Flávio Geraldo Resende Freitas, and  
13  
14 753 Alessandra Duarte Santiago. Irmandade Santa Casa de Misericórdia de Sorocaba (SP):  
15  
16 754 Márcia Rosangela Bertin, Luiz Otsubo, and Ana Laura Pinatti Marques. Hospital Geral  
17  
18 755 de Taipas (SP): Martha Pereira Torres and Gileade Gomes dos Santos. Hospital  
19  
20  
21 756 Regional do Vale do Paraíba (SP): Márcia Christina Gomes, Caio Lúcio Soubhia  
22  
23 757 Nunes, and Felipe Alves Moreira. Central Estadual de Transplantes (AC): Regiane  
24  
25 758 Clelia Ferrari. Central Estadual de Transplantes (AL): Daniela Barbosa Ramos. Central  
26  
27 759 Estadual de Transplantes (AM): Leny Nascimento Motta Passos. Central Estadual de  
28  
29  
30 760 Transplantes (BA): América Carolina Brandão de Melo Sodré and Rita de Cassia  
31  
32 761 Martins Pinto Pedosa. Central Estadual de Transplantes (CE): Eliana Regia Barbosa de  
33  
34 762 Almeida. Central Estadual de Transplantes (DF): Daniela Ferreira Salomão Pontes.  
35  
36 763 Central Estadual de Transplantes (ES): Raquel Duarte Correa Matiello and Maria dos  
37  
38 764 Santos Machado. Central Estadual de Transplantes (GO): Fernando Castro and Gustavo  
39  
40 765 Prudente Gonçalves. Central Estadual de Transplantes (MA): Maria Ines Gomes de  
41  
42 766 Oliveira. Central Estadual de Transplantes (MG): Omar Lopes Cancado Junior. Central  
43  
44 767 Estadual de Transplantes (MS): Claire Carmen Miozzo. Central Estadual de  
45  
46 768 Transplantes (PB): Gyanna Lys Melo Moreira Montenegro. Central Estadual de  
47  
48 769 Transplantes (PE): Noemy Alencar de Carvalho Gomes. Central Estadual de  
49  
50  
51 770 Transplantes (PR): Arlene Teresinha Cagol Garcia Badoch. Central Estadual de  
52  
53 771 Transplantes (RJ): Rodrigo Alves Sarlo and Gabriel Teixeira e Mello Pereira. Central  
54  
55 772 Estadual de Transplantes (RN): Raissa de Medeiros Marques. Central Estadual de  
56  
57  
58  
59  
60

- 1  
2  
3 773 Transplantes (RO): Suely Lima Araújo Toledo. Central Estadual de Transplantes (RS):  
4  
5 774 Cristiano Franke and Ricardo Klein Ruhling. Central Estadual de Transplantes (SE):  
6  
7 775 Benito Oliveira Fernandez. Central Estadual de Transplantes (SP): Agenor Spalini and  
8  
9  
10 776 Marizete Peixoto Medeiros. Sistema Nacional de Transplantes: Brena Pinheiro Coelho  
11  
12 777 and Joselio Emar de Araújo  
13  
14  
15  
16  
17  
18  
19  
20  
21  
22  
23  
24  
25  
26  
27  
28  
29  
30  
31  
32  
33  
34  
35  
36  
37  
38  
39  
40  
41  
42  
43  
44  
45  
46  
47  
48  
49  
50  
51  
52  
53  
54  
55  
56  
57  
58  
59  
60

For peer review only

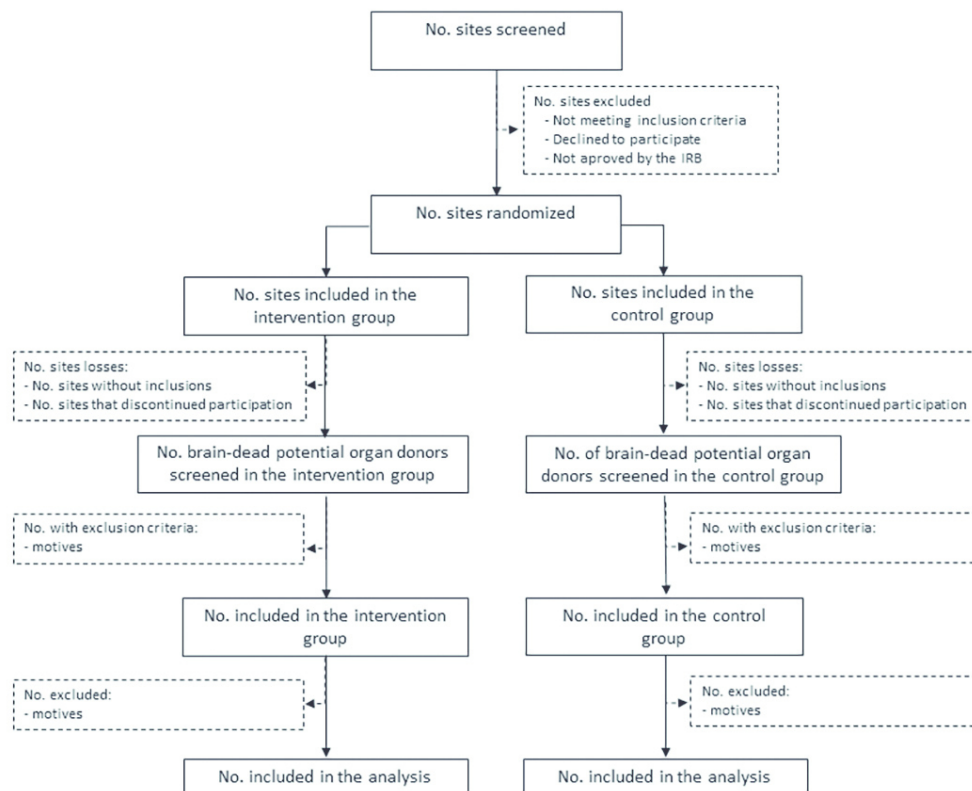

Study flow diagram.  
 IRB, Institutional Review Board; No., number

90x90mm (300 x 300 DPI)

1  
2  
3  
4  
5  
6  
7  
8  
9  
10  
11  
12  
13  
14  
15  
16  
17  
18  
19  
20  
21  
22  
23  
24  
25  
26  
27  
28  
29  
30  
31  
32  
33  
34  
35  
36  
37  
38  
39  
40  
41  
42  
43  
44  
45  
46  
47  
48  
49  
50  
51  
52  
53  
54  
55  
56  
57  
58  
59  
60

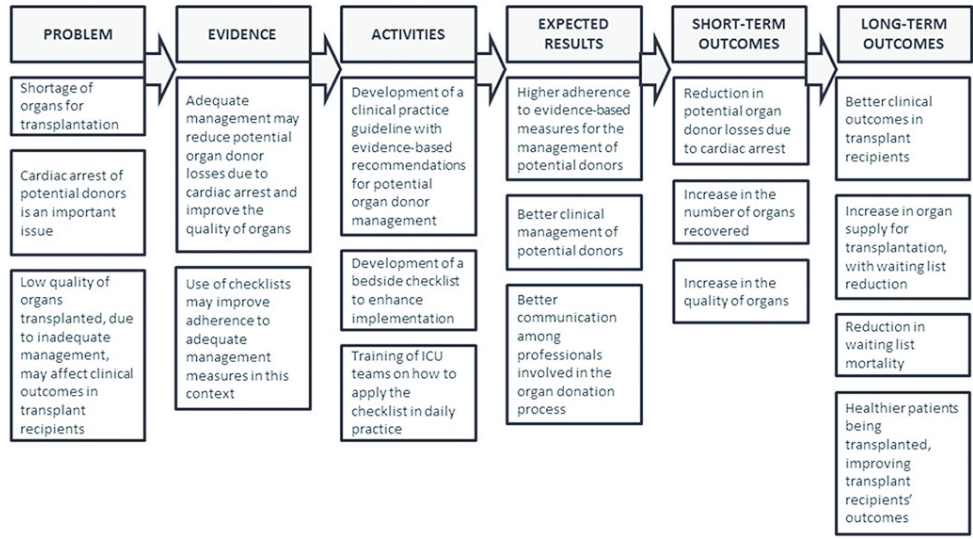

Logic model for the checklist intervention.

90x90mm (300 x 300 DPI)

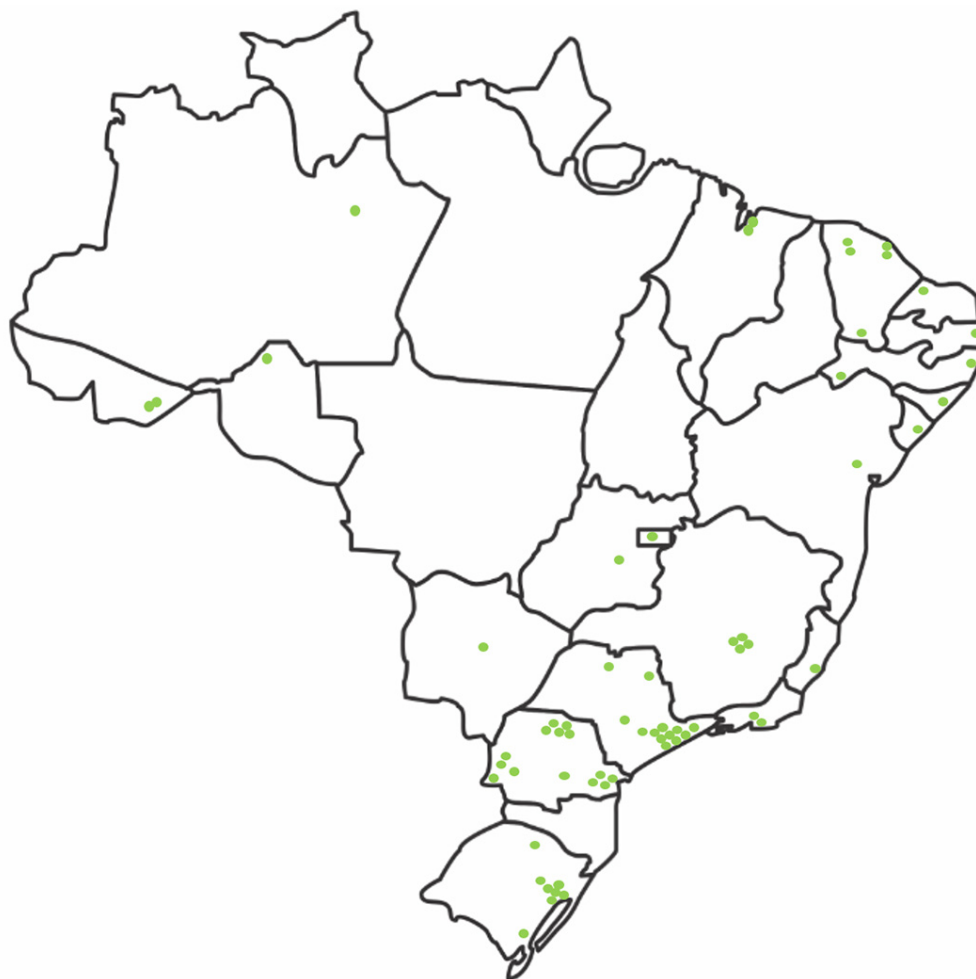

Geographical distribution of the participating intensive care units in Brazil.  
(map base copyright obtained from [www.gettyimages.pt](http://www.gettyimages.pt))

90x90mm (300 x 300 DPI)

**Online Supplementary File 1.** Items from the World Health Organisation Trial

## Registration Data Set.

| <b>DATA CATEGORY</b>                          | <b>INFORMATION</b>                                                                                                                                                       |
|-----------------------------------------------|--------------------------------------------------------------------------------------------------------------------------------------------------------------------------|
| Primary registry and trial identifying number | ClinicalTrials.gov<br>NCT03179020                                                                                                                                        |
| Registry name                                 | Donation Network to Optimize Organ Recovery Study (DONORS)                                                                                                               |
| Date of registration in primary registry      | June 7, 2017                                                                                                                                                             |
| Secondary identifying numbers                 | CAAE 53999616.0.1001.5330                                                                                                                                                |
| Source of monetary or material support        | The present study was funded by the Brazilian Ministry of Health through the Programme of Institutional Development of the Brazilian Unified Health System (PROADI-SUS). |
| Primary sponsor                               | Brazilian Ministry of Health                                                                                                                                             |
| Secondary sponsor                             | Brazilian Ministry of Health                                                                                                                                             |
| Contact for public queries                    | Glauco Westphal, MD, PHD: Rua Ramiro Barcelos, 910.<br>Postal code: 90035-001 - Porto Alegre, RS, Brazil.<br>E-MAIL: glauco.ww@gmail.com<br>Tel.: +55-51-3314.3385       |
| Contact for scientific queries                | Glauco Westphal, MD, PHD: Rua Ramiro Barcelos, 910.<br>Postal code: 90035-001 - Porto Alegre, RS, Brazil.<br>E-MAIL: glauco.ww@gmail.com<br>Tel.: +55-51-3314.3385       |

|                                       |                                                                                                                                                                                                                                                                                                                                                                                                       |
|---------------------------------------|-------------------------------------------------------------------------------------------------------------------------------------------------------------------------------------------------------------------------------------------------------------------------------------------------------------------------------------------------------------------------------------------------------|
| Public title                          | Donation Network to Optimise Organ Recovery Study (DONORS)                                                                                                                                                                                                                                                                                                                                            |
| Scientific title                      | Implementation of an evidence-based checklist for potential brain-dead donor organ management in intensive care units (ICUs): a cluster randomised trial                                                                                                                                                                                                                                              |
| Countries of recruitment              | Brazil                                                                                                                                                                                                                                                                                                                                                                                                |
| Health conditions or problems studied | Brain death<br>Organ donation                                                                                                                                                                                                                                                                                                                                                                         |
| Interventions                         | <ol style="list-style-type: none"> <li>1) Active comparator: management of the potential donor guided by the use of an evidence-based checklist. This checklist is based on main recommendations of the Brazilian guideline for the management of potential multiple organ donors.</li> <li>2) Control comparator: management of the potential donor according to usual care.</li> </ol>              |
| Key inclusion and exclusion criteria  | <ol style="list-style-type: none"> <li>1) For ICUs<br/>           Inclusion criteria: adult ICUs reporting at least 10 valid potential donors (without clinical contraindications for donation) per year.<br/>           Exclusion criteria: coronary care units, intermediate care units, emergency departments, ICUs that already use checklists for the management of potential donors.</li> </ol> |

|                         |                                                                                                                                                                                                                                                                                                                                                                                                                                                                                                                                                                                            |
|-------------------------|--------------------------------------------------------------------------------------------------------------------------------------------------------------------------------------------------------------------------------------------------------------------------------------------------------------------------------------------------------------------------------------------------------------------------------------------------------------------------------------------------------------------------------------------------------------------------------------------|
|                         | <p>2) For potential donors</p> <p>Inclusion criteria: age of 14 years or older, suspected brain death after the first clinical test.</p> <p>Exclusion criteria: age &gt; 90 years, HIV, metastatic cancer, uncontrolled sepsis, acute hepatitis, malaria, acute viral infections, cryptococcal meningoencephalitis and prion diseases, active tuberculosis treated for &lt;2 months, colonisation of the donor by bacteria without any option of antibiotic treatment, history of breast tumour, melanoma, soft tissue sarcoma or haematologic neoplasia, WHO Group 3 primary tumours.</p> |
| Study type              | <p>Interventional</p> <p>Allocation: randomized</p> <p>Intervention model: parallel</p> <p>Masking: open label</p> <p>Primary purpose: prevention</p>                                                                                                                                                                                                                                                                                                                                                                                                                                      |
| Date of first enrolment | 20 <sup>th</sup> June 2017                                                                                                                                                                                                                                                                                                                                                                                                                                                                                                                                                                 |
| Target sample size      | 1200 potential donors                                                                                                                                                                                                                                                                                                                                                                                                                                                                                                                                                                      |
| Recruitment status      | Recruiting                                                                                                                                                                                                                                                                                                                                                                                                                                                                                                                                                                                 |
| Primary outcome         | Losses of potential donors due to cardiac arrest                                                                                                                                                                                                                                                                                                                                                                                                                                                                                                                                           |
| Key secondary outcomes  | Proportion of effective organ donors, number of organs recovered per effective donor                                                                                                                                                                                                                                                                                                                                                                                                                                                                                                       |



**Online Supplementary File 2.** Exclusion criteria of brain-dead potential organ donors from the study.

| <b>Age</b>      | <b>Infection</b>                                                                                                                                                                                                                                                                                                                                                                                                                                                                              | <b>History of cancer</b>                                                                                                                                                                                                                                                                                                                                                                                                                                                                                                             |
|-----------------|-----------------------------------------------------------------------------------------------------------------------------------------------------------------------------------------------------------------------------------------------------------------------------------------------------------------------------------------------------------------------------------------------------------------------------------------------------------------------------------------------|--------------------------------------------------------------------------------------------------------------------------------------------------------------------------------------------------------------------------------------------------------------------------------------------------------------------------------------------------------------------------------------------------------------------------------------------------------------------------------------------------------------------------------------|
| Age > 90 years. | HIV, HTLV-I and II,<br>Uncontrolled sepsis,<br>Acute hepatitis,<br>Malaria,<br>Acute viral infections (e.g.,<br>rubella, rabies, West Nile virus,<br>adenovirus, enterovirus,<br>parvovirus, and viral<br>meningoencephalitis or of<br>unknown cause),<br>Cryptococcal<br>meningoencephalitis,<br>Prion diseases,<br>Active tuberculosis with <2<br>months of treatment,<br>Bacterial colonisation of the<br>donor without antibiotic<br>treatment options (resistant to all<br>antibiotics). | Metastatic cancer,<br>Breast tumours,<br>Melanoma,<br>Soft-tissue sarcoma,<br>Haematological malignancy,<br>Primary tumours of the central<br>nervous system – Group 3<br>(anaplastic astrocytoma – grade III,<br>glioblastoma multiforme,<br>medulloblastoma, anaplastic<br>oligodendroglioma – Schmidt C<br>and D, malignant ependymoma,<br>pineoblastoma,<br>anaplastic/malignant meningioma,<br>intracranial sarcoma, germ cell<br>tumour – except well-differentiated<br>teratoma, chordoma, and primary<br>cerebral lymphoma). |

**Online Supplementary File 3.** English translation of the final version of the bedside checklist.

Name: \_\_\_\_\_

Date and time of 1<sup>st</sup> clinical examination consistent with brain death: \_\_\_\_/\_\_\_\_/\_\_\_\_ \_\_\_\_:\_\_\_\_

Current date and time: \_\_\_\_/\_\_\_\_/\_\_\_\_ \_\_\_\_:\_\_\_\_

| GOALS TO BE ACHIEVED                                             | STATUS                       |                             |                             | IMMEDIATE ACTIONS WHEN STATUS = "NO"                                                                                 | ACTION TAKEN?                |                             |
|------------------------------------------------------------------|------------------------------|-----------------------------|-----------------------------|----------------------------------------------------------------------------------------------------------------------|------------------------------|-----------------------------|
| SaO <sub>2</sub> ≥ 90%?                                          | <input type="checkbox"/> Yes | <input type="checkbox"/> No | <input type="checkbox"/> NA | Adjust FiO <sub>2</sub> and/or PEEP to SaO <sub>2</sub> ≥ 90%                                                        | <input type="checkbox"/> Yes | <input type="checkbox"/> No |
| Vt of 6 to 8 mL/kg of predicted weight?                          | <input type="checkbox"/> Yes | <input type="checkbox"/> No | <input type="checkbox"/> NA | Adjust Vt to 6 to 8 mL/kg                                                                                            | <input type="checkbox"/> Yes | <input type="checkbox"/> No |
| PEEP ≥ 8 cm H <sub>2</sub> O?                                    | <input type="checkbox"/> Yes | <input type="checkbox"/> No | <input type="checkbox"/> NA | Adjust PEEP to ≥ 8 cm H <sub>2</sub> O                                                                               | <input type="checkbox"/> Yes | <input type="checkbox"/> No |
| MAP ≥ 65 mmHg and good tissue perfusion after crystalloid bolus? | <input type="checkbox"/> Yes | <input type="checkbox"/> No | <input type="checkbox"/> NA | Continue fluid infusion while there is volume responsiveness (ex.: ΔPp ≥ 13% / ΔMAP ≥ 8% / ΔSV ≥ 10% / CVP < 8 mmHg) | <input type="checkbox"/> Yes | <input type="checkbox"/> No |
| MAP ≥ 65 mmHg and good tissue perfusion after volume adjustment? | <input type="checkbox"/> Yes | <input type="checkbox"/> No | <input type="checkbox"/> NA | Maintain / initiate noradrenaline (dopamine if bradycardia)                                                          | <input type="checkbox"/> Yes | <input type="checkbox"/> No |

|    |                                                |                              |                             |                             |                                                      |                              |                              |                             |
|----|------------------------------------------------|------------------------------|-----------------------------|-----------------------------|------------------------------------------------------|------------------------------|------------------------------|-----------------------------|
| 1  |                                                |                              |                             |                             |                                                      |                              |                              |                             |
| 2  |                                                |                              |                             |                             |                                                      |                              |                              |                             |
| 3  |                                                |                              |                             |                             |                                                      |                              |                              |                             |
| 4  | Vasopressin and hydrocortisone were associated |                              |                             |                             |                                                      |                              |                              |                             |
| 5  |                                                |                              |                             |                             | Add vasopressin (1 IU bolus + 0.5-2.4 IU / h) and    | <input type="checkbox"/> Yes | <input type="checkbox"/> No  |                             |
| 6  | after maintaining / initiating noradrenaline / | <input type="checkbox"/> Yes | <input type="checkbox"/> No | <input type="checkbox"/> NA |                                                      |                              |                              |                             |
| 7  |                                                |                              |                             |                             | Add hydrocortisone 100 mg 8/8 h                      | <input type="checkbox"/> Yes | <input type="checkbox"/> No  |                             |
| 8  | dopamine?                                      |                              |                             |                             |                                                      |                              |                              |                             |
| 9  |                                                |                              |                             |                             |                                                      |                              |                              |                             |
| 10 |                                                |                              |                             |                             |                                                      |                              |                              |                             |
| 11 |                                                |                              |                             |                             | Assess need for volume replacement                   |                              |                              |                             |
| 12 | Diuresis < 4 mL/kg/h?                          | <input type="checkbox"/> Yes | <input type="checkbox"/> No | <input type="checkbox"/> NA |                                                      | <input type="checkbox"/> Yes | <input type="checkbox"/> No  |                             |
| 13 |                                                |                              |                             |                             | Maintain / initiate vasopressin or desmopressin (IV) |                              |                              |                             |
| 14 |                                                |                              |                             |                             |                                                      |                              |                              |                             |
| 15 | Na <sup>+</sup> < 155 mEq/L?                   | <input type="checkbox"/> Yes | <input type="checkbox"/> No | <input type="checkbox"/> NA | Correct and order laboratory control in 6 h          | <input type="checkbox"/> Yes | <input type="checkbox"/> No  |                             |
| 16 |                                                |                              |                             |                             |                                                      |                              |                              |                             |
| 17 |                                                |                              |                             |                             |                                                      |                              |                              |                             |
| 18 | K <sup>+</sup> between 3.5 and 5.5 mEq/L?      | <input type="checkbox"/> Yes | <input type="checkbox"/> No | <input type="checkbox"/> NA | Correct and order laboratory control in 6 h          | <input type="checkbox"/> Yes | <input type="checkbox"/> No  |                             |
| 19 |                                                |                              |                             |                             |                                                      |                              |                              |                             |
| 20 |                                                |                              |                             |                             |                                                      |                              |                              |                             |
| 21 | Mg <sup>++</sup> > 1.6 mEq/L?                  | <input type="checkbox"/> Yes | <input type="checkbox"/> No | <input type="checkbox"/> NA | Correct and order laboratory control in 6 h          | <input type="checkbox"/> Yes | <input type="checkbox"/> No  |                             |
| 22 |                                                |                              |                             |                             |                                                      |                              |                              |                             |
| 23 |                                                |                              |                             |                             | Insulin IV to maintain glycaemia between 140 and 180 |                              |                              |                             |
| 24 | Capillary glycaemia < 180 mg/dL?               | <input type="checkbox"/> Yes | <input type="checkbox"/> No | <input type="checkbox"/> NA | mg/dL                                                | <input type="checkbox"/> Yes | <input type="checkbox"/> No  |                             |
| 25 |                                                |                              |                             |                             |                                                      |                              |                              |                             |
| 26 |                                                |                              |                             |                             |                                                      |                              |                              |                             |
| 27 | Haemoglobin ≥ 7 g/dL?                          | <input type="checkbox"/> Yes | <input type="checkbox"/> No | <input type="checkbox"/> NA | Transfuse red blood cells to Hb ≥ 7g/dL              | <input type="checkbox"/> Yes | <input type="checkbox"/> No  |                             |
| 28 |                                                |                              |                             |                             |                                                      |                              |                              |                             |
| 29 | Absence of infection?                          | <input type="checkbox"/> Yes | <input type="checkbox"/> No | <input type="checkbox"/> NA | Initiate / maintain antibiotic therapy               | <input type="checkbox"/> Yes | <input type="checkbox"/> No  |                             |
| 30 |                                                |                              |                             |                             |                                                      |                              |                              |                             |
| 31 |                                                |                              |                             |                             |                                                      |                              |                              |                             |
| 32 | Proper body temperature?                       |                              |                             |                             |                                                      |                              |                              |                             |
| 33 |                                                |                              |                             |                             | Get 34 to 35°C if without vasopressor                | <input type="checkbox"/> NA  | <input type="checkbox"/> Yes | <input type="checkbox"/> No |
| 34 | No vasopressor: Goal: 34-35°C (after clinical  | <input type="checkbox"/> Yes | <input type="checkbox"/> No | <input type="checkbox"/> NA |                                                      |                              |                              |                             |
| 35 | assessments)                                   |                              |                             |                             | Get > 35°C if with vasopressor                       | <input type="checkbox"/> NA  | <input type="checkbox"/> Yes | <input type="checkbox"/> No |
| 36 |                                                |                              |                             |                             |                                                      |                              |                              |                             |
| 37 |                                                |                              |                             |                             |                                                      |                              |                              |                             |
| 38 |                                                |                              |                             |                             |                                                      |                              |                              |                             |
| 39 |                                                |                              |                             |                             |                                                      |                              |                              |                             |
| 40 |                                                |                              |                             |                             |                                                      |                              |                              |                             |
| 41 |                                                |                              |                             |                             |                                                      |                              |                              |                             |
| 42 |                                                |                              |                             |                             |                                                      |                              |                              |                             |
| 43 |                                                |                              |                             |                             |                                                      |                              |                              |                             |
| 44 |                                                |                              |                             |                             |                                                      |                              |                              |                             |
| 45 |                                                |                              |                             |                             |                                                      |                              |                              |                             |
| 46 |                                                |                              |                             |                             |                                                      |                              |                              |                             |

1  
2  
3  
4 With vasopressor: > 35°C  
5  
6

7  
8  
9 **Nurse:** \_\_\_\_\_ **Intensivist:** \_\_\_\_\_

10  
11 CVP, central venous pressure;  $\Delta Pp$ , pulse pressure respiratory variation;  $\Delta SV$ , stroke volume respiratory variation;  $FiO_2$ , fraction of inspired  
12 oxygen; Hb, haemoglobin;  $K^+$ , potassium; MAP, mean arterial pressure;  $Mg^{++}$ , magnesium;  $Na^+$ , sodium; PEEP, positive end-expiratory  
13 pressure;  $SaO_2$ , arterial oxygen saturation;  $V_t$ , tidal volume.  
14  
15  
16  
17  
18  
19  
20  
21  
22  
23  
24  
25  
26  
27  
28  
29  
30  
31  
32  
33  
34  
35  
36  
37  
38  
39  
40  
41  
42  
43  
44  
45  
46

**Online Supplementary File 4.** Family interview support guide.

---

**PREPARING FOR THE FAMILY INTERVIEW**

---

**GROUNDS: Establishing an aid relationship with family members**

**Triad: Respect, Empathy, and Authenticity**

---

**READ THE ACTIONS BELOW CAREFULLY BEFORE EACH STEP OF  
THE FAMILY INTERVIEW**

---

- |                                                                |                                                                                                                                                                                                                                                                                                                                                                                                                                           |
|----------------------------------------------------------------|-------------------------------------------------------------------------------------------------------------------------------------------------------------------------------------------------------------------------------------------------------------------------------------------------------------------------------------------------------------------------------------------------------------------------------------------|
| <b>1. Arranging the location of the interview</b>              | <input type="checkbox"/> Well-ventilated place or room<br><input type="checkbox"/> Restricted access (avoid interferences)<br><input type="checkbox"/> Enough space and chairs for all participants<br><input type="checkbox"/> No barriers between interviewer and interviewee (e.g., table, chairs, etc.)<br><input type="checkbox"/> Facial tissues and water are available<br><input type="checkbox"/> Phones are turned off          |
| <b>2. Defining the interview participants</b>                  | <input type="checkbox"/> ICU physician<br><input type="checkbox"/> Transplant co-ordinator and/or ICU nurse are present<br><input type="checkbox"/> 1st*/2nd** degree relatives or legally authorised representative***<br>*1st degree relatives: father, mother, children, full siblings;<br>**2nd degree relatives: grandparents, grandchildren;<br>***Legally authorised representative: Surrogate/ judicial (documented) <sup>1</sup> |
| <b>3. Reviewing the components of non-verbal communication</b> | <input type="checkbox"/> Have all family members sitting down<br><input type="checkbox"/> Leave land-line phones off the hook and turn off mobile phones<br><input type="checkbox"/> Avoid crossing your arms or legs                                                                                                                                                                                                                     |
-

- 
- Have a trustful look and a serene expression
  - Speak in a gentle voice
  - Speak in a fine cadence, use pauses
  - Tolerate periods of silence
  - Give full attention to what family members say,  
“Listen more and talk less”

---

**4. Reviewing the components of verbal communication**

- Greet everyone and introduce yourself
- Refer to the patient by his/her name
- Find out what the family knows about the case
- Ask family members what they want to know
- Summarise previous clinical data
- Use simple language, avoid unnecessary technical jargon
- Make your message clear, keep it short
- Acknowledge emotions and negative reactions
- Avoid expressions like “do not cry”, “keep calm”, “I know how you feel”

---

**STEP 1 - FIRST FAMILY CONFERENCE**

**COMMUNICATING THE ESTABLISHMENT OF A BRAIN DEATH**

**PROTOCOL – 1st clinical examination**

- 
- Key points of the first conference**
- The ICU physician is responsible for communicating about the possibility of death**
  - Communicate the possibility of brain death to the family**
-

---

- **DO NOT** talk about donation

- Inform that **further tests** will be performed

- Review** and **confirm** that the family understands what a suspected death is and that further tests will be performed
- Make sure** the family knows how to reach you for questions

---

## STEP 2 - SECOND FAMILY CONFERENCE

### COMMUNICATING THE BRAIN DEATH – after 2 clinical tests and neuro-imaging evidence

---

**Key points of the second conference**

- The ICU physician is responsible for** communicating about the confirmation of brain death
- Communicate the confirmation of brain death to the family**
  - Preferably use the word ‘death’ instead of the expression ‘brain death’. (despite all efforts, unfortunately your loved one died...)
- DO NOT** talk about donation
- Wait silently** for the family’s reactions and needs
- Review** and **confirm** that the family understands that the patient is dead
- Ask the family** if they have any questions

**IMPORTANT:** “Proceed to STEP 3 only after making sure that the family understands the death”

---

## STEP 3 - THIRD FAMILY CONFERENCE

---

---

**INTERVIEW FOR MULTI-ORGAN DONATION - after the family's  
understanding of the death**

---

**Key points of the third  
conference**

**Person leading the interview:**

- 1st option: IHTC/OPO member
- 2nd option: ICU physician or nurse

**Aspects of the interview**

- Check whether the family **understands** the meaning of the diagnosis of brain death (understands that their loved one is dead)
- Explain to the family that the death occurred under **circumstances that allow them to help** other people by means of organ donation
- Ask the family if their loved one had expressed a wish in life to be an organ donor
- Offer the family, in view of this special situation, the opportunity to discuss about the possibility of organ donation (it is optional)
- Make sure** the family knows how to reach you for questions

---

**STEP 4 - PLANNING THE APPROACH ACCORDING TO THE FAMILY'S  
DECISION**

---

**FAMILY CONSENT FOR  
DONATION**

**FAMILY REFUSAL FOR  
DONATION**

**- Obtain the Family Consent Form,  
fully and correctly completed**

---



- 
- 1  
2  
3 - Complete the death certificate
- 4  
5  
6 - **Evaluate the possibility of a rescue**  
7 **interview** for donation after family  
8 conflicts have been resolved
- 9  
10 - **Consider withdrawing therapeutic**  
11 **support** “The physician is legally and  
12 ethically entitled to withdraw therapeutic  
13 support, including mechanical ventilation,  
14 and release the body to the family.”<sup>2</sup>  
15  
16  
17  
18  
19  
20  
21 - Complete the death certificate  
22
- 

## DEATH CERTIFICATE or FORENSIC MEDICAL EXAMINATION

### ICU physician’s responsibility

- 
- | □ NON-VIOLENT DEATH                                                                                                                                                                                                                                                                                                                                                                                                                                   | □ VIOLENT DEATH                                                                                                                                                                                                                                                                                                                                                                                                                                                                                                                                               |
|-------------------------------------------------------------------------------------------------------------------------------------------------------------------------------------------------------------------------------------------------------------------------------------------------------------------------------------------------------------------------------------------------------------------------------------------------------|---------------------------------------------------------------------------------------------------------------------------------------------------------------------------------------------------------------------------------------------------------------------------------------------------------------------------------------------------------------------------------------------------------------------------------------------------------------------------------------------------------------------------------------------------------------|
| <p>28</p> <p>29 - Complete the “<b>Death Certificate</b>”</p> <p>30 including the <b>date and time of death</b> and</p> <p>31 the data of the <b>last examination</b></p> <p>32 <b>performed</b> (2nd clinical examination) <b>or</b></p> <p>33 neuro-imaging evidence.</p> <p>34</p> <p>35</p> <p>36</p> <p>37</p> <p>38</p> <p>39</p> <p>40</p> <p>41</p> <p>42</p> <p>43</p> <p>44</p> <p>45</p> <p>46</p> <p>47</p> <p>48</p> <p>49</p> <p>50</p> | <p>30 Complete the “<b>Forensic Medical</b></p> <p>31 <b>Examination Referral Form</b>” including</p> <p>32 the <b>date and time of death</b> and the data of</p> <p>33 the <b>last examination performed</b> (2nd</p> <p>34 clinical examination) <b>or</b> neuro-imaging</p> <p>35 evidence.</p> <p>36</p> <p>37 - Request the Forensic Medical Institute</p> <p>38 for <b>AUTHORISATION TO REMOVE</b></p> <p>39 <b>ORGANS OR TISSUES</b></p> <p>40</p> <p>41</p> <p>42</p> <p>43</p> <p>44</p> <p>45</p> <p>46</p> <p>47</p> <p>48</p> <p>49</p> <p>50</p> |
- 

<sup>1</sup> Brazilian Federal Law No. 10211 of March 23, 2001;

<sup>2</sup> Brazilian Federal Board of Medicine – Resolution No. 1826 of December 6, 2007.

**Online Supplementary File 5.** Sites and Institutional Review Board approval number.

|                      | SITE (Brazilian city, estate)                                                                         | INSTITUTIONAL REVIEW BOARD                                                | APPROVAL NUMBER      |
|----------------------|-------------------------------------------------------------------------------------------------------|---------------------------------------------------------------------------|----------------------|
| 7<br>8<br>9          | Co-ordinating centre: Hospital Moinhos de Vento –(Porto Alegre, Rio Grande do Sul)                    | HOSPITAL MOINHOS DE VENTO –<br>H MV                                       | 53999616.0.1001.5330 |
| 11<br>12<br>13       | 1 Hospital Alberto Urquiza Wanderley (João Pessoa, Paraíba)                                           | HOSPITAL MOINHOS DE VENTO –<br>H MV                                       | 53999616.0.2031.5330 |
| 15<br>16             | 2 Hospital Beneficência Portuguesa de São Paulo (São Paulo, São Paulo)                                | HOSPITAL BENEFICÊNCIA<br>PORTUGUESA DE SÃO PAULO                          | 53999616.0.2037.5483 |
| 18<br>19<br>20<br>21 | 3 Hospital Bom Jesus de Ponta Grossa (Ponta Grossa, Paraná)                                           | CENTRO DE ENSINO SUPERIOR DOS<br>CAMPOS<br>GERAIS - CESCAGE/PR            | 53999616.0.2061.5215 |
| 22<br>23             | 4 Hospital Bom Jesus de Toledo (Toledo, Paraná)                                                       | HOSPITAL MOINHOS DE VENTO –<br>H MV                                       | 53999616.0.2063.5330 |
| 25                   | 5 Hospital Bruno Born (Lajeado, Rio Grande do Sul)                                                    | CENTRO UNIVERSITÁRIO UNIVATES                                             | 53999616.0.2027.5310 |
| 27<br>28             | 6 Casa de Saúde de Santos (Santos, São Paulo)                                                         | HOSPITAL GUILHERME<br>ALVARO                                              | 53999616.0.2020.5448 |
| 30<br>31<br>32       | 7 Hospital Cristo Redentor (Porto Alegre, Rio Grande do Sul)                                          | HOSPITAL NOSSA SENHORA<br>DA CONCEIÇÃO - GRUPO<br>HOSPITALAR CONCEIÇÃO    | 53999616.0.2035.5530 |
| 34                   | 8 Hospital da Restauração (Recife, Pernambuco)                                                        | HOSPITAL DA RESTAURAÇÃO                                                   | 53999616.0.2055.5198 |
| 35<br>36<br>37       | 9 Hospital das Clínicas de Botucatu (Botucatu, São Paulo)                                             | UNESP -FACULDADE DE<br>MEDICINA DE BOTUCATU                               | 53999616.0.2017.5411 |
| 38<br>39<br>40<br>41 | 10 Hospital das Clínicas da Faculdade de Medicina de Ribeirão Preto – USP (Ribeirão Preto, São Paulo) | USP - HOSPITAL DAS<br>CLÍNICAS DA FACULDADE DE<br>MEDICINA DE RIBEIRÃO    | 53999616.0.2036.5440 |
| 42<br>43<br>44       | 11 Hospital das Clínicas de Minas Gerais (Belo Horizonte, Minas Gerais)                               | UNIVERSIDADE FEDERAL DE<br>MINAS GERAIS                                   | 53999616.0.2041.5149 |
| 45<br>46<br>47       | 12 Hospital das Clínicas de Rio Branco (Rio Branco, Acre)                                             | HOSPITAL DAS CLÍNICAS DO<br>ACRE - HCA/FUNDHACRE                          | 53999616.0.2070.5009 |
| 48<br>49<br>50<br>51 | 13 Hospital de Base de São José do Rio Preto (São José do Rio Preto, São Paulo)                       | FACULDADE DE MEDICINA DE<br>SÃO JOSÉ DO RIO PRETO - FAMERP<br>- SP        | 53999616.0.2082.5415 |
| 53<br>54<br>55<br>56 | 14 Hospital de Base do Distrito Federal (Brasília, Distrito Federal)                                  | FUNDAÇÃO DE ENSINO E PESQUISA<br>EM CIÊNCIAS DA<br>SAÚDE/ FEPECS/ SES/ DF | 53999616.0.2008.5553 |
| 57<br>58<br>59       | 15 Hospital de Pronto Socorro Nelson Marchezan (Canoas, Rio Grande do Sul)                            | HOSPITAL MOINHOS DE<br>VENTO – H MV                                       | 53999616.0.2081.5330 |

|    |                                                                                 |                                                            |                      |
|----|---------------------------------------------------------------------------------|------------------------------------------------------------|----------------------|
| 16 | Hospital de Clínicas de Porto Alegre (Porto Alegre, Rio Grande do Sul)          | HOSPITAL DE CLÍNICAS DE PORTO ALEGRE - HCPA / UFRGS        | 53999616.0.2010.5327 |
| 17 | Hospital de Ensino Doutor Washington Antônio de Barros (Petrolina, Pernambuco)  | FUNDAÇÃO UNIVERSIDADE FEDERAL DO VALE DO SÃO FRANCISCO     | 53999616.0.2056.5196 |
| 18 | Hospital de Pronto Socorro de Porto Alegre (Porto Alegre, Rio Grande do Sul)    | SECRETARIA MUNICIPAL DE SAÚDE DE PORTO ALEGRE/ SMSPA       | 53999616.0.2050.5338 |
| 19 | Hospital de Pronto Socorro Dr. João Lúcio Pereira Machado (Manaus, Amazonas)    | FUNDAÇÃO HOSPITAL ADRIANO JORGE – FHAJ                     | 53999616.0.2088.0007 |
| 20 | Hospital de Pronto Socorro João Paulo II (Porto Velho, Rondônia)                | HOSPITAL MOINHOS DE VENTO – HMV                            | 53999616.0.2072.5330 |
| 21 | Hospital de Urgência de Goiânia (Goiânia, Goiás)                                | HOSPITAL DE URGÊNCIA DE GOIÂNIA – HUGO                     | 53999616.0.2058.0033 |
| 22 | Hospital de Urgência e Emergência de Rio Branco (Rio Branco, Acre)              | HOSPITAL DAS CLÍNICAS DO ACRE - HCA/FUNDHACRE              | 53999616.0.2069.5009 |
| 23 | Hospital de Urgência de Sergipe (Aracaju, Sergipe)                              | HOSPITAL MOINHOS DE VENTO – HMV                            | 53999616.0.2073.5330 |
| 24 | Hospital Dr. Carlos Macieira (São Luís, Maranhão)                               | CENTRO UNIVERSITÁRIO DO MARANHÃO – UNICEUMA                | 53999616.0.2053.5084 |
| 25 | Hospital e Maternidade Angelina Caron (Campina Grande do Sul, Paraná)           | HOSPITAL E MATERNIDADE ANGELINA CARON/PR                   | 53999616.0.2052.5226 |
| 26 | Hospital Estadual de Urgência e Emergência de Vitória (Vitória, Espírito Santo) | CENTRO INTEGRADO DE ATENÇÃO A SAÚDE - CIAS/ UNIMED VITÓRIA | 53999616.0.2057.5061 |
| 27 | Hospital Estadual Getúlio Vargas (Rio de Janeiro, Rio de Janeiro)               | HOSPITAL MOINHOS DE VENTO – HMV                            | 53999616.0.2093.5330 |
| 28 | Hospital Evangélico de Londrina (Londrina, Paraná)                              | ASSOCIAÇÃO EVANGÉLICA BENEFICENTE DE LONDRINA – AEBEL      | 53999616.0.2014.5696 |
| 29 | Hospital Geral Cleriston Andrade (Feira de Santana, Bahia)                      | SECRETARIA DA SAÚDE DO ESTADO DA BAHIA - SESAB             | 53999616.0.2048.0052 |
| 30 | Hospital Geral de Fortaleza (Fortaleza, Ceará)                                  | HOSPITAL GERAL DE FORTALEZA/SUS                            | 53999616.0.2076.5040 |
| 31 | Hospital Geral de Nova Iguaçu (Nova Iguaçu, Rio de Janeiro)                     | HOSPITAL GERAL DE NOVA IGUAÇU (HGNI) – RJ                  | 53999616.0.2046.5254 |
| 32 | Hospital Geral de Taipas (São Paulo, São Paulo)                                 | HOSPITAL MOINHOS DE                                        | 53999616.0.2086.5330 |

|    |                                                                                                  |                                                                     |                      |
|----|--------------------------------------------------------------------------------------------------|---------------------------------------------------------------------|----------------------|
|    |                                                                                                  | VENTO – HMV                                                         |                      |
| 33 | Hospital Geral Prof. Osvaldo Brandão Vilela (Maceió, Alagoas)                                    | CENTRO UNIVERSITÁRIO TIRADENTES - UNIT/AL                           | 53999616.0.2071.5641 |
| 34 | Hospital Instituto Dr. José Frota (Fortaleza, Ceará)                                             | INSTITUTO DR. JOSÉ FROTA - IJF/ PREFEITURA DE FORTALEZA             | 53999616.0.2075.5047 |
| 35 | Hospital João XXIII Fundação Hospitalar do Estado de Minas Gerais (Belo Horizonte, Minas Gerais) | FUNDAÇÃO HOSPITALAR DO ESTADO DE MINAS GERAIS - FHEMIG              | 53999616.0.2099.5119 |
| 36 | Hospital Municipal Irmã Dulce (Praia Grande, São Paulo)                                          | FACULDADE DE MEDICINA DO ABC\FUNDAÇÃO DO ABC - FMABC                | 53999616.0.2083.0082 |
| 37 | Hospital Norte Paranaense (Arapongas, Paraná)                                                    | HOSPITAL NORTE PARANAENSE - ASSOCIAÇÃO NORTE PARANAENSE             | 53999616.0.2067.8017 |
| 38 | Hospital Nossa Senhora do Rocio de Campo Largo (Campo Largo, Paraná)                             | UFPR - HOSPITAL DE CLÍNICAS DA UNIVERSIDADE FEDERAL DO PARANÁ       | 53999616.0.2064.0096 |
| 39 | Hospital Padre Germano Lauck (Foz do Iguaçu, Paraná)                                             | UNIOESTE – CENTRO DE CIÊNCIAS BIOLÓGICAS E DA SAÚDE DA UNIVERSIDADE | 53999616.0.2091.0107 |
| 40 | Hospital Paulistano (São Paulo, São Paulo)                                                       | HOSPITAL PRÓ-CARDÍACO - ESHO EMPRESA DE SERVIÇOS HOSPITALARES       | 53999616.0.2084.5533 |
| 41 | Hospital Regional do Cariri (Juazeiro do Norte, Ceará)                                           | INSTITUTO DE SAÚDE E GESTÃO HOSPITALAR - ISGH                       | 53999616.0.2077.5684 |
| 42 | Hospital Regional do Vale do Paraíba (Taubaté, São Paulo)                                        | UNITAU - UNIVERSIDADE DE TAUBATÉ                                    | 53999616.0.2097.5501 |
| 43 | Hospital Regional Norte (Sobral, Ceará)                                                          | INSTITUTO DE SAÚDE E GESTÃO HOSPITALAR - ISGH                       | 53999616.0.2045.5684 |
| 44 | Hospital Regional Tarcísio de Vasconcelos Maia (Natal, Rio Grande do Norte)                      | HOSPITAL MOINHOS DE VENTO – HMV                                     | 53999616.0.2079.5330 |
| 45 | Hospital Santa Rita de Maringá (Maringá, Paraná)                                                 | HOSPITAL MOINHOS DE VENTO – HMV                                     | 53999616.0.2066.5330 |
| 46 | Hospital São Paulo (São Paulo, São Paulo)                                                        | UNIFESP - HOSPITAL SÃO PAULO - HOSPITAL UNIVERSITÁRIO               | 53999616.0.2003.5505 |
| 47 | Hospital São Vicente de Paulo (Passo Fundo, Rio Grande do Sul)                                   | UNIVERSIDADE DE PASSO FUNDO/ PRÓ-REITORIA DE PESQUISA E PÓS         | 53999616.0.2032.5342 |

|    |                                                                                                                 |                                                                                           |                      |
|----|-----------------------------------------------------------------------------------------------------------------|-------------------------------------------------------------------------------------------|----------------------|
| 48 | Hospital São Vicente de Paulo Guarapuava (Guarapuava, Paraná)                                                   | UNIVERSIDADE ESTADUAL DO CENTRO OESTE - UNICENTRO                                         | 53999616.0.2068.0106 |
| 49 | Hospital Universitário Ciências Médicas (Belo Horizonte, Minas Gerais)                                          | COMITÊ DE ÉTICA EM PESQUISA CIÊNCIAS MÉDICAS - MG (CEPCM-MG)                              | 53999616.0.2033.5134 |
| 50 | Hospital Universitário de Cascavel do Oeste do Paraná (Cascavel, Paraná)                                        | UNIOESTE - CENTRO DE CIÊNCIAS BIOLÓGICAS E DA SAÚDE DA UNIVERSIDADE                       | 53999616.0.2043.0107 |
| 51 | Hospital Universitário de Maringá (Maringá, Paraná)                                                             | UNIVERSIDADE ESTADUAL DE MARINGÁ                                                          | 53999616.0.2026.0104 |
| 52 | Hospital Universitário Regional do Norte do Paraná (Londrina, Paraná)                                           | UNIVERSIDADE ESTADUAL DE LONDRINA - UEL                                                   | 53999616.0.2002.5231 |
| 53 | Hospital Universitário Regional dos Campos Gerais (Ponta Grossa, Paraná)                                        | FACULDADES PONTA GROSSA/ PR                                                               | 53999616.0.2060.5689 |
| 54 | Hospital Universitário São Francisco de Paula (Pelotas, Rio Grande do Sul)                                      | UNIVERSIDADE CATÓLICA DE PELOTAS - UCPEL                                                  | 53999616.0.2016.5339 |
| 55 | Hospital Universitário São Francisco da Providência de Deus de Bragança Paulista (Bragança Paulista, São Paulo) | UNIVERSIDADE SÃO FRANCISCO-SP                                                             | 53999616.0.2030.5514 |
| 56 | Irmandade da Santa Casa de Misericórdia de São Paulo (São Paulo, São Paulo)                                     | SANTA CASA DE MISERICÓRDIA DE SÃO PAULO                                                   | 53999616.0.2029.5479 |
| 57 | Irmandade Santa Casa de Misericórdia de Sorocaba (Sorocaba, São Paulo)                                          | FACULDADE DE CIÊNCIAS MÉDICAS E DA SAÚDE DA PONTIFÍCIA UNIVERSIDADE CATÓLICA DE SÃO PAULO | 53999616.0.2096.5373 |
| 58 | Santa Casa de Belo Horizonte (Belo Horizonte, Minas Gerais)                                                     | SANTA CASA DE MISERICÓRDIA DE BELO HORIZONTE - SCMBH                                      | 53999616.0.2028.5138 |
| 59 | Santa Casa de Campo Grande (Campo Grande, Mato Grosso do Sul)                                                   | HOSPITAL MOINHOS DE VENTO - HMV                                                           | 53999616.0.2059.5330 |
| 60 | Santa Casa de Misericórdia de Maringá (Maringá, Paraná)                                                         | HOSPITAL MOINHOS DE VENTO - HMV                                                           | 53999616.0.2062.5330 |
| 61 | Irmandade da Santa Casa de Porto Alegre (Porto Alegre, Rio Grande do Sul)                                       | IRMANDADE DA SANTA CASA DE MISERICÓRDIA DE PORTO ALEGRE - ISCMPA                          | 53999616.0.2013.5335 |
| 62 | Santa Casa de Misericórdia de Sobral (Sobral, Ceará)                                                            | UNIVERSIDADE ESTADUAL VALE DO ACARAÚ - UVA                                                | 53999616.0.2078.5053 |
| 63 | Hospital Municipal Djalma Marques (São Luís, Maranhão)                                                          | HOSPITAL E MATERNIDADE SÃO DOMINGOS                                                       | 53999616.0.2080.5085 |

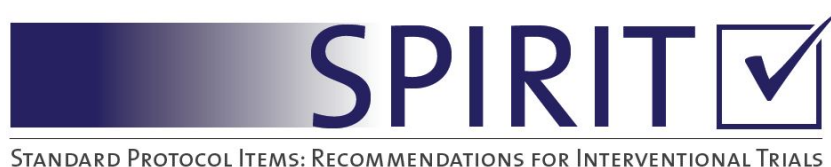

SPIRIT 2013 Checklist: Recommended items to address in a clinical trial protocol and related documents\*

| Section/item                      | Item No | Description                                                                                                                                                                                                                                                                                                                                          |
|-----------------------------------|---------|------------------------------------------------------------------------------------------------------------------------------------------------------------------------------------------------------------------------------------------------------------------------------------------------------------------------------------------------------|
| <b>Administrative information</b> |         |                                                                                                                                                                                                                                                                                                                                                      |
| Title                             | 1       | Descriptive title identifying the study design, population, interventions, and, if applicable, trial acronym – <b>yes: Title page (page 1)</b>                                                                                                                                                                                                       |
| Trial registration                | 2a      | Trial identifier and registry name. If not yet registered, name of intended registry – <b>yes: Title page (page 1), Abstract (page 4), Methods (page 8), and additional file named World_Health_Organization_Trial_Registration_Data_Set_rev</b>                                                                                                     |
|                                   | 2b      | All items from the World Health Organization Trial Registration Data Set – <b>yes: additional file named World_Health_Organization_Trial_Registration_Data_Set_rev</b>                                                                                                                                                                               |
| Protocol version                  | 3       | Date and version identifier – <b>not applicable</b>                                                                                                                                                                                                                                                                                                  |
| Funding                           | 4       | Sources and types of financial, material, and other support – <b>yes: Funding statement (page 30)</b>                                                                                                                                                                                                                                                |
| Roles and responsibilities        | 5a      | Names, affiliations, and roles of protocol contributors – <b>yes: Title page (pages 1 to 3) and Authors' contributions (page 30)</b>                                                                                                                                                                                                                 |
|                                   | 5b      | Name and contact information for the trial sponsor – <b>yes: Funding statement (page 30)</b>                                                                                                                                                                                                                                                         |
|                                   | 5c      | Role of study sponsor and funders, if any, in study design; collection, management, analysis, and interpretation of data; writing of the report; and the decision to submit the report for publication, including whether they will have ultimate authority over any of these activities – <b>yes: Organisational aspects of the study (page 19)</b> |
|                                   | 5d      | Composition, roles, and responsibilities of the coordinating centre, steering committee, endpoint adjudication committee, data management team, and other individuals or groups overseeing the trial, if applicable (see Item 21a for data monitoring committee) – <b>yes: Organisational aspects of the study (page 19)</b>                         |

**Introduction**

|    |                                                           |     |                                                                               |
|----|-----------------------------------------------------------|-----|-------------------------------------------------------------------------------|
| 1  |                                                           |     |                                                                               |
| 2  | Background and                                            | 6a  | Description of research question and justification for undertaking the        |
| 3  | rationale                                                 |     | trial, including summary of relevant studies (published and                   |
| 4  |                                                           |     | unpublished) examining benefits and harms for each intervention –             |
| 5  |                                                           |     | yes: Introduction (page 6 to 7)                                               |
| 6  |                                                           |     |                                                                               |
| 7  |                                                           | 6b  | Explanation for choice of comparators – yes: Introduction (page 6 to          |
| 8  |                                                           |     | 7)                                                                            |
| 9  |                                                           |     |                                                                               |
| 10 | Objectives                                                | 7   | Specific objectives or hypotheses – yes: Introduction (page 7) and            |
| 11 |                                                           |     | Objectives (page 7 and 8)                                                     |
| 12 |                                                           |     |                                                                               |
| 13 |                                                           |     |                                                                               |
| 14 | Trial design                                              | 8   | Description of trial design including type of trial (eg, parallel group,      |
| 15 |                                                           |     | crossover, factorial, single group), allocation ratio, and framework (eg,     |
| 16 |                                                           |     | superiority, equivalence, noninferiority, exploratory) – yes: Methods         |
| 17 |                                                           |     | and Analysis (pages 7 and 13)                                                 |
| 18 |                                                           |     |                                                                               |
| 19 |                                                           |     |                                                                               |
| 20 | <b>Methods: Participants, interventions, and outcomes</b> |     |                                                                               |
| 21 |                                                           |     |                                                                               |
| 22 | Study setting                                             | 9   | Description of study settings (eg, community clinic, academic hospital)       |
| 23 |                                                           |     | and list of countries where data will be collected. Reference to where        |
| 24 |                                                           |     | list of study sites can be obtained – yes: Methods and Analysis (page         |
| 25 |                                                           |     | 8), and Study planning and implementation schedule (page 19)                  |
| 26 |                                                           |     |                                                                               |
| 27 |                                                           |     |                                                                               |
| 28 | Eligibility criteria                                      | 10  | Inclusion and exclusion criteria for participants. If applicable, eligibility |
| 29 |                                                           |     | criteria for study centres and individuals who will perform the               |
| 30 |                                                           |     | interventions (eg, surgeons, psychotherapists) – yes: Methods and             |
| 31 |                                                           |     | Analysis (pages 8, 9 to 11)                                                   |
| 32 |                                                           |     |                                                                               |
| 33 |                                                           |     |                                                                               |
| 34 | Interventions                                             | 11a | Interventions for each group with sufficient detail to allow replication,     |
| 35 |                                                           |     | including how and when they will be administered) – yes: Methods              |
| 36 |                                                           |     | and Analysis (pages 9 to 12)                                                  |
| 37 |                                                           |     |                                                                               |
| 38 |                                                           | 11b | Criteria for discontinuing or modifying allocated interventions for a         |
| 39 |                                                           |     | given trial participant (eg, drug dose change in response to harms,           |
| 40 |                                                           |     | participant request, or improving/worsening disease) – not applicable         |
| 41 |                                                           |     |                                                                               |
| 42 |                                                           | 11c | Strategies to improve adherence to intervention protocols, and any            |
| 43 |                                                           |     | procedures for monitoring adherence (eg, drug tablet return,                  |
| 44 |                                                           |     | laboratory tests) – yes: Methods and Analysis (pages 9 to 12, 17, 18)         |
| 45 |                                                           |     |                                                                               |
| 46 |                                                           |     |                                                                               |
| 47 |                                                           | 11d | Relevant concomitant care and interventions that are permitted or             |
| 48 |                                                           |     | prohibited during the trial – yes: Methods and Analysis (page 11)             |
| 49 |                                                           |     |                                                                               |
| 50 | Outcomes                                                  | 12  | Primary, secondary, and other outcomes, including the specific                |
| 51 |                                                           |     | measurement variable (eg, systolic blood pressure), analysis metric           |
| 52 |                                                           |     | (eg, change from baseline, final value, time to event), method of             |
| 53 |                                                           |     | aggregation (eg, median, proportion), and time point for each                 |
| 54 |                                                           |     | outcome. Explanation of the clinical relevance of chosen efficacy and         |
| 55 |                                                           |     | harm outcomes is strongly recommended – yes: Methods and                      |
| 56 |                                                           |     | Analysis (pages 13, 14, 17, 18)                                               |
| 57 |                                                           |     |                                                                               |
| 58 |                                                           |     |                                                                               |
| 59 |                                                           |     |                                                                               |
| 60 |                                                           |     |                                                                               |

|    |             |    |                                                                           |
|----|-------------|----|---------------------------------------------------------------------------|
| 1  |             |    |                                                                           |
| 2  | Participant | 13 | Time schedule of enrolment, interventions (including any run-ins and      |
| 3  | timeline    |    | washouts), assessments, and visits for participants. A schematic          |
| 4  |             |    | diagram is highly recommended (see Figure) – <b>yes: Study planning</b>   |
| 5  |             |    | <b>and implementation schedule (page 19) and Methods and Analysis</b>     |
| 6  |             |    | <b>(pages 9 to12)</b>                                                     |
| 7  |             |    |                                                                           |
| 8  | Sample size | 14 | Estimated number of participants needed to achieve study objectives       |
| 9  |             |    | and how it was determined, including clinical and statistical             |
| 10 |             |    | assumptions supporting any sample size calculations – <b>yes: Methods</b> |
| 11 |             |    | <b>and Analysis (page 13)</b>                                             |
| 12 |             |    |                                                                           |
| 13 |             |    |                                                                           |
| 14 | Recruitment | 15 | Strategies for achieving adequate participant enrolment to reach          |
| 15 |             |    | target sample size – <b>yes: Methods and Analysis (page 11)</b>           |
| 16 |             |    |                                                                           |

### Methods: Assignment of interventions (for controlled trials)

#### Allocation:

|    |                |     |                                                                             |
|----|----------------|-----|-----------------------------------------------------------------------------|
| 21 |                |     |                                                                             |
| 22 | Sequence       | 16a | Method of generating the allocation sequence (eg, computer-                 |
| 23 | generation     |     | generated random numbers), and list of any factors for stratification.      |
| 24 |                |     | To reduce predictability of a random sequence, details of any planned       |
| 25 |                |     | restriction (eg, blocking) should be provided in a separate document        |
| 26 |                |     | that is unavailable to those who enrol participants or assign               |
| 27 |                |     | interventions – <b>yes: Methods and Analysis (page 13)</b>                  |
| 28 |                |     |                                                                             |
| 29 |                |     |                                                                             |
| 30 | Allocation     | 16b | Mechanism of implementing the allocation sequence (eg, central              |
| 31 | concealment    |     | telephone; sequentially numbered, opaque, sealed envelopes),                |
| 32 | mechanism      |     | describing any steps to conceal the sequence until interventions are        |
| 33 |                |     | assigned – <b>yes: Methods and Analysis (page 13)</b>                       |
| 34 |                |     |                                                                             |
| 35 | Implementation | 16c | Who will generate the allocation sequence, who will enrol participants,     |
| 36 |                |     | and who will assign participants to interventions – <b>yes: Methods and</b> |
| 37 |                |     | <b>Analysis (page 13)</b>                                                   |
| 38 |                |     |                                                                             |
| 39 |                |     |                                                                             |
| 40 | Blinding       | 17a | Who will be blinded after assignment to interventions (eg, trial            |
| 41 | (masking)      |     | participants, care providers, outcome assessors, data analysts), and        |
| 42 |                |     | how – <b>yes: Methods and Analysis (page 13)</b>                            |
| 43 |                |     |                                                                             |
| 44 |                |     |                                                                             |
| 45 |                | 17b | If blinded, circumstances under which unblinding is permissible, and        |
| 46 |                |     | procedure for revealing a participant's allocated intervention during       |
| 47 |                |     | the trial – <b>not applicable</b>                                           |
| 48 |                |     |                                                                             |

### Methods: Data collection, management, and analysis

|    |                 |     |                                                                             |
|----|-----------------|-----|-----------------------------------------------------------------------------|
| 51 | Data collection | 18a | Plans for assessment and collection of outcome, baseline, and other         |
| 52 | methods         |     | trial data, including any related processes to promote data quality (eg,    |
| 53 |                 |     | duplicate measurements, training of assessors) and a description of         |
| 54 |                 |     | study instruments (eg, questionnaires, laboratory tests) along with         |
| 55 |                 |     | their reliability and validity, if known. Reference to where data           |
| 56 |                 |     | collection forms can be found, if not in the protocol – <b>yes: Methods</b> |
| 57 |                 |     | <b>and analysis (pages 15, 16) – complementary information will be</b>      |
| 58 |                 |     | <b>available at the statistical analysis plan paper</b>                     |
| 59 |                 |     |                                                                             |
| 60 |                 |     |                                                                             |



- 1  
2  
3  
4  
5  
6  
7  
8  
9  
10  
11  
12  
13  
14  
15  
16  
17  
18  
19  
20  
21  
22  
23  
24  
25  
26  
27  
28  
29  
30  
31  
32  
33  
34  
35  
36  
37  
38  
39  
40  
41  
42  
43  
44  
45  
46  
47  
48  
49  
50  
51  
52  
53  
54  
55  
56  
57  
58  
59  
60
- 18b Plans to promote participant retention and complete follow-up, including list of any outcome data to be collected for participants who discontinue or deviate from intervention protocols – yes: **Methods and analysis (pages 15, 16) – complementary information will be available at the statistical analysis plan paper**
- Data management 19 Plans for data entry, coding, security, and storage, including any related processes to promote data quality (eg, double data entry; range checks for data values). Reference to where details of data management procedures can be found, if not in the protocol – yes: **Methods and analysis (pages 15, 16) – complementary information will be available at the statistical analysis plan paper**
- Statistical methods 20a Statistical methods for analysing primary and secondary outcomes. Reference to where other details of the statistical analysis plan can be found, if not in the protocol – yes: **Methods and analysis (pages 17, 18) – complementary information will be available at the statistical analysis plan paper**
- 20b Methods for any additional analyses (eg, subgroup and adjusted analyses) – yes: **Methods and analysis (pages 17) – complementary information will be available at the statistical analysis plan paper**
- 20c Definition of analysis population relating to protocol non-adherence (eg, as randomised analysis), and any statistical methods to handle missing data (eg, multiple imputation) – yes: **Methods and analysis (page 17) – complementary information will be available at the statistical analysis plan paper**
- Methods: Monitoring**
- Data monitoring 21a Composition of data monitoring committee (DMC); summary of its role and reporting structure; statement of whether it is independent from the sponsor and competing interests; and reference to where further details about its charter can be found, if not in the protocol. Alternatively, an explanation of why a DMC is not needed **Complementary information will be available at the statistical analysis plan paper**
- 21b Description of any interim analyses and stopping guidelines, including who will have access to these interim results and make the final decision to terminate the trial **Complementary information will be available at the statistical analysis plan paper**
- Harms 22 Plans for collecting, assessing, reporting, and managing solicited and spontaneously reported adverse events and other unintended effects of trial interventions or trial conduct **Complementary information will be available at the statistical analysis plan paper**

|    |                                 |     |                                                                                                                                                                                                                                                                                                                                           |
|----|---------------------------------|-----|-------------------------------------------------------------------------------------------------------------------------------------------------------------------------------------------------------------------------------------------------------------------------------------------------------------------------------------------|
| 1  |                                 |     |                                                                                                                                                                                                                                                                                                                                           |
| 2  | Auditing                        | 23  | Frequency and procedures for auditing trial conduct, if any, and whether the process will be independent from investigators and the sponsor <b>Methods and analysis (page 15) – complementary information will be available at the statistical analysis plan paper</b>                                                                    |
| 3  |                                 |     |                                                                                                                                                                                                                                                                                                                                           |
| 4  |                                 |     |                                                                                                                                                                                                                                                                                                                                           |
| 5  |                                 |     |                                                                                                                                                                                                                                                                                                                                           |
| 6  |                                 |     |                                                                                                                                                                                                                                                                                                                                           |
| 7  |                                 |     |                                                                                                                                                                                                                                                                                                                                           |
| 8  | <b>Ethics and dissemination</b> |     |                                                                                                                                                                                                                                                                                                                                           |
| 9  |                                 |     |                                                                                                                                                                                                                                                                                                                                           |
| 10 | Research ethics approval        | 24  | Plans for seeking research ethics committee/institutional review board (REC/IRB) approval – <b>yes: Ethics and dissemination (pages 19, 20) and additional file “Sites and IRB approval”</b>                                                                                                                                              |
| 11 |                                 |     |                                                                                                                                                                                                                                                                                                                                           |
| 12 |                                 |     |                                                                                                                                                                                                                                                                                                                                           |
| 13 |                                 |     |                                                                                                                                                                                                                                                                                                                                           |
| 14 | Protocol amendments             | 25  | Plans for communicating important protocol modifications (eg, changes to eligibility criteria, outcomes, analyses) to relevant parties (eg, investigators, REC/IRBs, trial participants, trial registries, journals, regulators) – <b>yes: Ethics and dissemination (pages 19, 20)</b>                                                    |
| 15 |                                 |     |                                                                                                                                                                                                                                                                                                                                           |
| 16 |                                 |     |                                                                                                                                                                                                                                                                                                                                           |
| 17 |                                 |     |                                                                                                                                                                                                                                                                                                                                           |
| 18 |                                 |     |                                                                                                                                                                                                                                                                                                                                           |
| 19 |                                 |     |                                                                                                                                                                                                                                                                                                                                           |
| 20 | Consent or assent               | 26a | Who will obtain informed consent or assent from potential trial participants or authorised surrogates, and how (see Item 32) – <b>yes: Ethics and dissemination (pages 19, 20)</b>                                                                                                                                                        |
| 21 |                                 |     |                                                                                                                                                                                                                                                                                                                                           |
| 22 |                                 |     |                                                                                                                                                                                                                                                                                                                                           |
| 23 |                                 |     |                                                                                                                                                                                                                                                                                                                                           |
| 24 |                                 | 26b | Additional consent provisions for collection and use of participant data and biological specimens in ancillary studies, if applicable – <b>not applicable</b>                                                                                                                                                                             |
| 25 |                                 |     |                                                                                                                                                                                                                                                                                                                                           |
| 26 |                                 |     |                                                                                                                                                                                                                                                                                                                                           |
| 27 |                                 |     |                                                                                                                                                                                                                                                                                                                                           |
| 28 |                                 |     |                                                                                                                                                                                                                                                                                                                                           |
| 29 | Confidentiality                 | 27  | How personal information about potential and enrolled participants will be collected, shared, and maintained in order to protect confidentiality before, during, and after the trial – <b>yes: Methods and analysis (page 15)</b>                                                                                                         |
| 30 |                                 |     |                                                                                                                                                                                                                                                                                                                                           |
| 31 |                                 |     |                                                                                                                                                                                                                                                                                                                                           |
| 32 |                                 |     |                                                                                                                                                                                                                                                                                                                                           |
| 33 |                                 |     |                                                                                                                                                                                                                                                                                                                                           |
| 34 | Declaration of interests        | 28  | Financial and other competing interests for principal investigators for the overall trial and each study site – <b>yes, Competing interests’ statement (page 30) and individual conflict of interest forms</b>                                                                                                                            |
| 35 |                                 |     |                                                                                                                                                                                                                                                                                                                                           |
| 36 |                                 |     |                                                                                                                                                                                                                                                                                                                                           |
| 37 |                                 |     |                                                                                                                                                                                                                                                                                                                                           |
| 38 |                                 |     |                                                                                                                                                                                                                                                                                                                                           |
| 39 | Access to data                  | 29  | Statement of who will have access to the final trial dataset, and disclosure of contractual agreements that limit such access for investigators – <b>yes: Data sharing (page 30)</b>                                                                                                                                                      |
| 40 |                                 |     |                                                                                                                                                                                                                                                                                                                                           |
| 41 |                                 |     |                                                                                                                                                                                                                                                                                                                                           |
| 42 |                                 |     |                                                                                                                                                                                                                                                                                                                                           |
| 43 | Ancillary and post-trial care   | 30  | Provisions, if any, for ancillary and post-trial care, and for compensation to those who suffer harm from trial participation – <b>not applicable</b>                                                                                                                                                                                     |
| 44 |                                 |     |                                                                                                                                                                                                                                                                                                                                           |
| 45 |                                 |     |                                                                                                                                                                                                                                                                                                                                           |
| 46 |                                 |     |                                                                                                                                                                                                                                                                                                                                           |
| 47 |                                 |     |                                                                                                                                                                                                                                                                                                                                           |
| 48 | Dissemination policy            | 31a | Plans for investigators and sponsor to communicate trial results to participants, healthcare professionals, the public, and other relevant groups (eg, via publication, reporting in results databases, or other data sharing arrangements), including any publication restrictions – <b>yes: Ethics and dissemination (pages 19, 20)</b> |
| 49 |                                 |     |                                                                                                                                                                                                                                                                                                                                           |
| 50 |                                 |     |                                                                                                                                                                                                                                                                                                                                           |
| 51 |                                 |     |                                                                                                                                                                                                                                                                                                                                           |
| 52 |                                 |     |                                                                                                                                                                                                                                                                                                                                           |
| 53 |                                 |     |                                                                                                                                                                                                                                                                                                                                           |
| 54 |                                 |     |                                                                                                                                                                                                                                                                                                                                           |
| 55 |                                 | 31b | Authorship eligibility guidelines and any intended use of professional writers – <b>not applicable</b>                                                                                                                                                                                                                                    |
| 56 |                                 |     |                                                                                                                                                                                                                                                                                                                                           |
| 57 |                                 |     |                                                                                                                                                                                                                                                                                                                                           |
| 58 |                                 | 31c | Plans, if any, for granting public access to the full protocol, participant-level dataset, and statistical code – <b>yes: Data sharing (page 30)</b>                                                                                                                                                                                      |
| 59 |                                 |     |                                                                                                                                                                                                                                                                                                                                           |
| 60 |                                 |     |                                                                                                                                                                                                                                                                                                                                           |

## Appendices

|                            |    |                                                                                                                                                                                                                        |
|----------------------------|----|------------------------------------------------------------------------------------------------------------------------------------------------------------------------------------------------------------------------|
| Informed consent materials | 32 | Model consent form and other related documentation given to participants and authorised surrogates – <b>not applicable</b>                                                                                             |
| Biological specimens       | 33 | Plans for collection, laboratory evaluation, and storage of biological specimens for genetic or molecular analysis in the current trial and for future use in ancillary studies, if applicable – <b>not applicable</b> |

---

\*It is strongly recommended that this checklist be read in conjunction with the SPIRIT 2013 Explanation & Elaboration for important clarification on the items. Amendments to the protocol should be tracked and dated. The SPIRIT checklist is copyrighted by the SPIRIT Group under the Creative Commons "[Attribution-NonCommercial-NoDerivs 3.0 Unported](#)" license.

For peer review only
