# Supplementary material for: DONORS (Donation Network to Optimise Organ Recovery Study): Study protocol to evaluate the implementation of an evidence-based checklist for brain-dead potential organ donor management in intensive care units, a cluster randomised trial
Source: PubMed Central journal article supplement — BMJ Open. 2019 Jun 25;9(6):e028570. doi: 10.1136/bmjopen-2018-028570 (PMC6597655; doi:10.1136/bmjopen-2018-028570), 2019-06-25
Supplement: bmjopen-2018-028570supp001.pdf [file bmjopen-2018-028570supp001.pdf]

**Online Supplementary File 1.** Items from the World Health Organisation Trial

## Registration Data Set.

| <b>DATA CATEGORY</b>                          | <b>INFORMATION</b>                                                                                                                                                       |
|-----------------------------------------------|--------------------------------------------------------------------------------------------------------------------------------------------------------------------------|
| Primary registry and trial identifying number | ClinicalTrials.gov<br>NCT03179020                                                                                                                                        |
| Registry name                                 | Donation Network to Optimize Organ Recovery Study (DONORS)                                                                                                               |
| Date of registration in primary registry      | June 7, 2017                                                                                                                                                             |
| Secondary identifying numbers                 | CAAE 53999616.0.1001.5330                                                                                                                                                |
| Source of monetary or material support        | The present study was funded by the Brazilian Ministry of Health through the Programme of Institutional Development of the Brazilian Unified Health System (PROADI-SUS). |
| Primary sponsor                               | Brazilian Ministry of Health                                                                                                                                             |
| Secondary sponsor                             | Brazilian Ministry of Health                                                                                                                                             |
| Contact for public queries                    | Glauco Westphal, MD, PHD: Rua Ramiro Barcelos, 910.<br>Postal code: 90035-001 - Porto Alegre, RS, Brazil.<br>E-MAIL: glauco.ww@gmail.com<br>Tel.: +55-51-3314.3385       |
| Contact for scientific queries                | Glauco Westphal, MD, PHD: Rua Ramiro Barcelos, 910.<br>Postal code: 90035-001 - Porto Alegre, RS, Brazil.<br>E-MAIL: glauco.ww@gmail.com<br>Tel.: +55-51-3314.3385       |

|                                       |                                                                                                                                                                                                                                                                                                                                                                                             |
|---------------------------------------|---------------------------------------------------------------------------------------------------------------------------------------------------------------------------------------------------------------------------------------------------------------------------------------------------------------------------------------------------------------------------------------------|
| Public title                          | Donation Network to Optimise Organ Recovery Study (DONORS)                                                                                                                                                                                                                                                                                                                                  |
| Scientific title                      | Implementation of an evidence-based checklist for potential brain-dead donor organ management in intensive care units (ICUs): a cluster randomised trial                                                                                                                                                                                                                                    |
| Countries of recruitment              | Brazil                                                                                                                                                                                                                                                                                                                                                                                      |
| Health conditions or problems studied | Brain death<br>Organ donation                                                                                                                                                                                                                                                                                                                                                               |
| Interventions                         | <ol style="list-style-type: none"> <li>1) Active comparator: management of the potential donor guided by the use of an evidence-based checklist. This checklist is based on main recommendations of the Brazilian guideline for the management of potential multiple organ donors.</li> <li>2) Control comparator: management of the potential donor according to usual care.</li> </ol>    |
| Key inclusion and exclusion criteria  | <ol style="list-style-type: none"> <li>1) For ICUs<br/> <p>Inclusion criteria: adult ICUs reporting at least 10 valid potential donors (without clinical contraindications for donation) per year.</p> <p>Exclusion criteria: coronary care units, intermediate care units, emergency departments, ICUs that already use checklists for the management of potential donors.</p> </li> </ol> |

|                         |                                                                                                                                                                                                                                                                                                                                                                                                                                                                                                                                                                                            |
|-------------------------|--------------------------------------------------------------------------------------------------------------------------------------------------------------------------------------------------------------------------------------------------------------------------------------------------------------------------------------------------------------------------------------------------------------------------------------------------------------------------------------------------------------------------------------------------------------------------------------------|
|                         | <p>2) For potential donors</p> <p>Inclusion criteria: age of 14 years or older, suspected brain death after the first clinical test.</p> <p>Exclusion criteria: age &gt; 90 years, HIV, metastatic cancer, uncontrolled sepsis, acute hepatitis, malaria, acute viral infections, cryptococcal meningoencephalitis and prion diseases, active tuberculosis treated for &lt;2 months, colonisation of the donor by bacteria without any option of antibiotic treatment, history of breast tumour, melanoma, soft tissue sarcoma or haematologic neoplasia, WHO Group 3 primary tumours.</p> |
| Study type              | <p>Interventional</p> <p>Allocation: randomized</p> <p>Intervention model: parallel</p> <p>Masking: open label</p> <p>Primary purpose: prevention</p>                                                                                                                                                                                                                                                                                                                                                                                                                                      |
| Date of first enrolment | 20 <sup>th</sup> June 2017                                                                                                                                                                                                                                                                                                                                                                                                                                                                                                                                                                 |
| Target sample size      | 1200 potential donors                                                                                                                                                                                                                                                                                                                                                                                                                                                                                                                                                                      |
| Recruitment status      | Recruiting                                                                                                                                                                                                                                                                                                                                                                                                                                                                                                                                                                                 |
| Primary outcome         | Losses of potential donors due to cardiac arrest                                                                                                                                                                                                                                                                                                                                                                                                                                                                                                                                           |
| Key secondary outcomes  | Proportion of effective organ donors, number of organs recovered per effective donor                                                                                                                                                                                                                                                                                                                                                                                                                                                                                                       |
