# Supplementary material for: DONORS (Donation Network to Optimise Organ Recovery Study): Study protocol to evaluate the implementation of an evidence-based checklist for brain-dead potential organ donor management in intensive care units, a cluster randomised trial
Source: PubMed Central journal article supplement — BMJ Open. 2019 Jun 25;9(6):e028570. doi: 10.1136/bmjopen-2018-028570 (PMC6597655; doi:10.1136/bmjopen-2018-028570), 2019-06-25
Supplement: bmjopen-2018-028570supp002.pdf [file bmjopen-2018-028570supp002.pdf]

**Online Supplementary File 2.** Exclusion criteria of brain-dead potential organ donors from the study.

| <b>Age</b>      | <b>Infection</b>                                                                                                                                                                                                                                                                                                                                                                                                                                                                              | <b>History of cancer</b>                                                                                                                                                                                                                                                                                                                                                                                                                                                                                                             |
|-----------------|-----------------------------------------------------------------------------------------------------------------------------------------------------------------------------------------------------------------------------------------------------------------------------------------------------------------------------------------------------------------------------------------------------------------------------------------------------------------------------------------------|--------------------------------------------------------------------------------------------------------------------------------------------------------------------------------------------------------------------------------------------------------------------------------------------------------------------------------------------------------------------------------------------------------------------------------------------------------------------------------------------------------------------------------------|
| Age > 90 years. | HIV, HTLV-I and II,<br>Uncontrolled sepsis,<br>Acute hepatitis,<br>Malaria,<br>Acute viral infections (e.g.,<br>rubella, rabies, West Nile virus,<br>adenovirus, enterovirus,<br>parvovirus, and viral<br>meningoencephalitis or of<br>unknown cause),<br>Cryptococcal<br>meningoencephalitis,<br>Prion diseases,<br>Active tuberculosis with <2<br>months of treatment,<br>Bacterial colonisation of the<br>donor without antibiotic<br>treatment options (resistant to all<br>antibiotics). | Metastatic cancer,<br>Breast tumours,<br>Melanoma,<br>Soft-tissue sarcoma,<br>Haematological malignancy,<br>Primary tumours of the central<br>nervous system – Group 3<br>(anaplastic astrocytoma – grade III,<br>glioblastoma multiforme,<br>medulloblastoma, anaplastic<br>oligodendroglioma – Schmidt C<br>and D, malignant ependymoma,<br>pineoblastoma,<br>anaplastic/malignant meningioma,<br>intracranial sarcoma, germ cell<br>tumour – except well-differentiated<br>teratoma, chordoma, and primary<br>cerebral lymphoma). |
