# Supplementary material for: DONORS (Donation Network to Optimise Organ Recovery Study): Study protocol to evaluate the implementation of an evidence-based checklist for brain-dead potential organ donor management in intensive care units, a cluster randomised trial
Source: PubMed Central journal article supplement — BMJ Open. 2019 Jun 25;9(6):e028570. doi: 10.1136/bmjopen-2018-028570 (PMC6597655; doi:10.1136/bmjopen-2018-028570), 2019-06-25
Supplement: bmjopen-2018-028570supp003.pdf [file bmjopen-2018-028570supp003.pdf]

**Online Supplementary File 3.** English translation of the final version of the bedside checklist.

**Name:** \_\_\_\_\_

**Date and time of 1<sup>st</sup> clinical examination consistent with brain death:** \_\_\_\_/\_\_\_\_/\_\_\_\_ \_\_\_\_:

**Current date and time:** \_\_\_\_/\_\_\_\_/\_\_\_\_ \_\_\_\_:

| GOALS TO BE ACHIEVED                                               | STATUS                       |                             |                             | IMMEDIATE ACTIONS WHEN STATUS = "NO"                                                                                 | ACTION TAKEN?                |                             |
|--------------------------------------------------------------------|------------------------------|-----------------------------|-----------------------------|----------------------------------------------------------------------------------------------------------------------|------------------------------|-----------------------------|
| SaO <sub>2</sub> ≥ 90%?                                            | <input type="checkbox"/> Yes | <input type="checkbox"/> No | <input type="checkbox"/> NA | Adjust FiO <sub>2</sub> and/or PEEP to SaO <sub>2</sub> ≥ 90%                                                        | <input type="checkbox"/> Yes | <input type="checkbox"/> No |
| Vt of 6 to 8 mL/kg of predicted weight?                            | <input type="checkbox"/> Yes | <input type="checkbox"/> No | <input type="checkbox"/> NA | Adjust Vt to 6 to 8 mL/kg                                                                                            | <input type="checkbox"/> Yes | <input type="checkbox"/> No |
| PEEP ≥ 8 cm H <sub>2</sub> O?                                      | <input type="checkbox"/> Yes | <input type="checkbox"/> No | <input type="checkbox"/> NA | Adjust PEEP to ≥ 8 cm H <sub>2</sub> O                                                                               | <input type="checkbox"/> Yes | <input type="checkbox"/> No |
| MAP ≥ 65 mmHg and good tissue perfusion after a crystalloid bolus? | <input type="checkbox"/> Yes | <input type="checkbox"/> No | <input type="checkbox"/> NA | Continue fluid infusion while there is volume responsiveness (ex.: ΔPp ≥ 13% / ΔMAP ≥ 8% / ΔSV ≥ 10% / CVP < 8 mmHg) | <input type="checkbox"/> Yes | <input type="checkbox"/> No |
| MAP ≥ 65 mmHg and good tissue perfusion after volume adjustment?   | <input type="checkbox"/> Yes | <input type="checkbox"/> No | <input type="checkbox"/> NA | Maintain / initiate noradrenaline (dopamine if bradycardia)                                                          | <input type="checkbox"/> Yes | <input type="checkbox"/> No |

|                                                                                                         |                              |                             |                             |                                                                                            |                              |                              |                              |                             |
|---------------------------------------------------------------------------------------------------------|------------------------------|-----------------------------|-----------------------------|--------------------------------------------------------------------------------------------|------------------------------|------------------------------|------------------------------|-----------------------------|
| Vasopressin and hydrocortisone were associated after maintaining / initiating noradrenaline / dopamine? | <input type="checkbox"/> Yes | <input type="checkbox"/> No | <input type="checkbox"/> NA | Add vasopressin (1 IU bolus + 0.5-2.4 IU / h) and<br>Add hydrocortisone 100 mg 8/8 h       | <input type="checkbox"/> Yes | <input type="checkbox"/> No  | <input type="checkbox"/> Yes | <input type="checkbox"/> No |
| Diuresis < 4 mL/kg/h?                                                                                   | <input type="checkbox"/> Yes | <input type="checkbox"/> No | <input type="checkbox"/> NA | Assess need for volume replacement<br>Maintain / initiate vasopressin or desmopressin (IV) | <input type="checkbox"/> Yes | <input type="checkbox"/> No  | <input type="checkbox"/> Yes | <input type="checkbox"/> No |
| Na <sup>+</sup> < 155 mEq/L?                                                                            | <input type="checkbox"/> Yes | <input type="checkbox"/> No | <input type="checkbox"/> NA | Correct and order laboratory control in 6 h                                                | <input type="checkbox"/> Yes | <input type="checkbox"/> No  | <input type="checkbox"/> Yes | <input type="checkbox"/> No |
| K <sup>+</sup> between 3.5 and 5.5 mEq/L?                                                               | <input type="checkbox"/> Yes | <input type="checkbox"/> No | <input type="checkbox"/> NA | Correct and order laboratory control in 6 h                                                | <input type="checkbox"/> Yes | <input type="checkbox"/> No  | <input type="checkbox"/> Yes | <input type="checkbox"/> No |
| Mg <sup>++</sup> > 1.6 mEq/L?                                                                           | <input type="checkbox"/> Yes | <input type="checkbox"/> No | <input type="checkbox"/> NA | Correct and order laboratory control in 6 h                                                | <input type="checkbox"/> Yes | <input type="checkbox"/> No  | <input type="checkbox"/> Yes | <input type="checkbox"/> No |
| Capillary glycaemia < 180 mg/dL?                                                                        | <input type="checkbox"/> Yes | <input type="checkbox"/> No | <input type="checkbox"/> NA | Insulin IV to maintain glycaemia between 140 and 180 mg/dL                                 | <input type="checkbox"/> Yes | <input type="checkbox"/> No  | <input type="checkbox"/> Yes | <input type="checkbox"/> No |
| Haemoglobin ≥ 7 g/dL?                                                                                   | <input type="checkbox"/> Yes | <input type="checkbox"/> No | <input type="checkbox"/> NA | Transfuse red blood cells to Hb ≥ 7g/dL                                                    | <input type="checkbox"/> Yes | <input type="checkbox"/> No  | <input type="checkbox"/> Yes | <input type="checkbox"/> No |
| Absence of infection?                                                                                   | <input type="checkbox"/> Yes | <input type="checkbox"/> No | <input type="checkbox"/> NA | Initiate / maintain antibiotic therapy                                                     | <input type="checkbox"/> Yes | <input type="checkbox"/> No  | <input type="checkbox"/> Yes | <input type="checkbox"/> No |
| Proper body temperature?                                                                                |                              |                             |                             | Get 34 to 35°C if without vasopressor                                                      | <input type="checkbox"/> NA  | <input type="checkbox"/> Yes | <input type="checkbox"/> No  |                             |
| - No vasopressor: Goal: 34-35°C (after clinical tests)                                                  | <input type="checkbox"/> Yes | <input type="checkbox"/> No | <input type="checkbox"/> NA | Get > 35°C if with vasopressor                                                             | <input type="checkbox"/> NA  | <input type="checkbox"/> Yes | <input type="checkbox"/> No  |                             |

- With vasopressor:  $> 35^{\circ}\text{C}$

---

**Nurse:** \_\_\_\_\_ **Intensivist:** \_\_\_\_\_

CVP, central venous pressure;  $\Delta\text{Pp}$ , pulse pressure respiratory variation;  $\Delta\text{SV}$ , stroke volume respiratory variation;  $\text{FiO}_2$ , fraction of inspired oxygen; Hb, haemoglobin;  $\text{K}^+$ , potassium; MAP, mean arterial pressure;  $\text{Mg}^{++}$ , magnesium;  $\text{Na}^+$ , sodium; PEEP, positive end-expiratory pressure;  $\text{SaO}_2$ , arterial oxygen saturation;  $\text{Vt}$ , tidal volume.
