# Supplementary material for: DONORS (Donation Network to Optimise Organ Recovery Study): Study protocol to evaluate the implementation of an evidence-based checklist for brain-dead potential organ donor management in intensive care units, a cluster randomised trial
Source: PubMed Central journal article supplement — BMJ Open. 2019 Jun 25;9(6):e028570. doi: 10.1136/bmjopen-2018-028570 (PMC6597655; doi:10.1136/bmjopen-2018-028570), 2019-06-25
Supplement: bmjopen-2018-028570supp004.pdf [file bmjopen-2018-028570supp004.pdf]

---

**PREPARING FOR THE FAMILY INTERVIEW**

---

**GROUNDS: Establishing an aid relationship with family members**

**Triad: Respect, Empathy, and Authenticity**

---

**READ THE ACTIONS BELOW CAREFULLY BEFORE EACH STEP OF  
THE FAMILY INTERVIEW**

---

- 
- |                                                                        |                                                                                                                                                                                                                                                                                                                                                                                                                                                             |
|------------------------------------------------------------------------|-------------------------------------------------------------------------------------------------------------------------------------------------------------------------------------------------------------------------------------------------------------------------------------------------------------------------------------------------------------------------------------------------------------------------------------------------------------|
| <b>1. Arranging the location<br/>of the interview</b>                  | <input type="checkbox"/> Well-ventilated place or room<br><br><input type="checkbox"/> Restricted access (avoid interferences)<br><br><input type="checkbox"/> Enough space and chairs for all participants<br><br><input type="checkbox"/> No barriers between interviewer and interviewee<br>(e.g., table, chairs, etc.)<br><br><input type="checkbox"/> Facial tissues and water are available<br><br><input type="checkbox"/> Phones are turned off     |
| <hr/>                                                                  |                                                                                                                                                                                                                                                                                                                                                                                                                                                             |
| <b>2. Defining the interview<br/>participants</b>                      | <input type="checkbox"/> ICU physician<br><br><input type="checkbox"/> Transplant co-ordinator and/or ICU nurse are present<br><br><input type="checkbox"/> 1st*/2nd** degree relatives or legally authorised<br>representative***<br><br>*1st degree relatives: father, mother, children, full siblings;<br>**2nd degree relatives: grandparents, grandchildren;<br>***Legally authorised representative: Surrogate/ judicial<br>(documented) <sup>1</sup> |
| <hr/>                                                                  |                                                                                                                                                                                                                                                                                                                                                                                                                                                             |
| <b>3. Reviewing the<br/>components of non-verbal<br/>communication</b> | <input type="checkbox"/> Have all family members sitting down<br><br><input type="checkbox"/> Leave land-line phones off the hook and turn off<br>mobile phones<br><br><input type="checkbox"/> Avoid crossing your arms or legs                                                                                                                                                                                                                            |
-

- 
- Have a trustful look and a serene expression
  - Speak in a gentle voice
  - Speak in a fine cadence, use pauses
  - Tolerate periods of silence
  - Give full attention to what family members say, “Listen more and talk less”

---

**4. Reviewing the components of verbal communication**

- Greet everyone and introduce yourself
- Refer to the patient by his/her name
- Find out what the family knows about the case
- Ask family members what they want to know
- Summarise previous clinical data
- Use simple language, avoid unnecessary technical jargon
- Make your message clear, keep it short
- Acknowledge emotions and negative reactions
- Avoid expressions like “do not cry”, “keep calm”, “I know how you feel”

---

**STEP 1 - FIRST FAMILY CONFERENCE**

**COMMUNICATING THE ESTABLISHMENT OF A BRAIN DEATH**

**PROTOCOL – 1st clinical examination**

---

**Key points of the first conference**

- The ICU physician is responsible for communicating about the possibility of death**
- Communicate the possibility of brain death to the family**

---

- **DO NOT** talk about donation

- Inform that **further tests** will be performed

□ **Review** and **confirm** that the family understands what a suspected death is and that further tests will be performed

□ **Make sure** the family knows how to reach you for questions

---

## STEP 2 - SECOND FAMILY CONFERENCE

### COMMUNICATING THE BRAIN DEATH – after 2 clinical tests and neuro-imaging evidence

---

#### Key points of the second conference

□ **The ICU physician is responsible for** communicating about the confirmation of brain death

□ **Communicate the confirmation of brain death to the family**

- Preferably use the word ‘death’ instead of the expression ‘brain death’. (despite all efforts, unfortunately your loved one died...)

□ **DO NOT** talk about donation

□ **Wait silently** for the family’s reactions and needs

□ **Review** and **confirm** that the family understands that the patient is dead

□ **Ask the family** if they have any questions

**IMPORTANT:** “Proceed to STEP 3 only after making sure that the family understands the death”

---

## STEP 3 - THIRD FAMILY CONFERENCE

---

---

**INTERVIEW FOR MULTI-ORGAN DONATION - after the family's**

**understanding of the death**

---

**Key points of the third  
conference**

**Person leading the interview:**

- 1st option: IHTC/OPO member
- 2nd option: ICU physician or nurse

**Aspects of the interview**

- Check whether the family **understands** the meaning of the diagnosis of brain death (understands that their loved one is dead)
- Explain to the family that the death occurred under **circumstances that allow them to help** other people by means of organ donation
- Ask the family if their loved one had expressed a wish in life to be an organ donor
- Offer the family, in view of this special situation, the opportunity to discuss about the possibility of organ donation (it is optional)
- Make sure** the family knows how to reach you for questions

---

**STEP 4 - PLANNING THE APPROACH ACCORDING TO THE FAMILY'S**

**DECISION**

---

**FAMILY CONSENT FOR  
DONATION**

**FAMILY REFUSAL FOR  
DONATION**

**- Obtain the Family Consent Form,**

fully and correctly completed

---

---

- Complete the death certificate

- **Evaluate the possibility of a rescue interview** for donation after family conflicts have been resolved

- **Consider withdrawing therapeutic support** “The physician is legally and ethically entitled to withdraw therapeutic support, including mechanical ventilation, and release the body to the family.”<sup>2</sup>

- Complete the death certificate

---

## **DEATH CERTIFICATE or FORENSIC MEDICAL EXAMINATION**

### **ICU physician’s responsibility**

---

#### **□ NON-VIOLENT DEATH**

- Complete the “**Death Certificate**” including the **date and time of death** and the data of the **last examination performed** (2nd clinical examination) **or** neuro-imaging evidence.

#### **□ VIOLENT DEATH**

- Complete the “**Forensic Medical Examination Referral Form**” including the **date and time of death** and the data of the **last examination performed** (2nd clinical examination) **or** neuro-imaging evidence.

- Request the Forensic Medical Institute for **AUTHORISATION TO REMOVE ORGANS OR TISSUES**

---

<sup>1</sup> Brazilian Federal Law No. 10211 of March 23, 2001;

<sup>2</sup> Brazilian Federal Board of Medicine – Resolution No. 1826 of December 6, 2007.
