# Supplementary material for: DONORS (Donation Network to Optimise Organ Recovery Study): Study protocol to evaluate the implementation of an evidence-based checklist for brain-dead potential organ donor management in intensive care units, a cluster randomised trial
Source: PubMed Central journal article supplement — BMJ Open. 2019 Jun 25;9(6):e028570. doi: 10.1136/bmjopen-2018-028570 (PMC6597655; doi:10.1136/bmjopen-2018-028570), 2019-06-25
Supplement: bmjopen-2018-028570supp005.pdf [file bmjopen-2018-028570supp005.pdf]

**Online Supplementary File 5.** Sites and Institutional Review Board approval number.

| <b>SITE (Brazilian city, estate)</b>                                               |                                                                                                    | <b>INSTITUTIONAL REVIEW BOARD</b>                                         | <b>APPROVAL NUMBER</b> |
|------------------------------------------------------------------------------------|----------------------------------------------------------------------------------------------------|---------------------------------------------------------------------------|------------------------|
| Co-ordinating centre: Hospital Moinhos de Vento –(Porto Alegre, Rio Grande do Sul) |                                                                                                    | HOSPITAL MOINHOS DE VENTO –<br>H MV                                       | 53999616.0.1001.5330   |
| 1                                                                                  | Hospital Alberto Urquiza Wanderley (João Pessoa, Paraíba)                                          | HOSPITAL MOINHOS DE VENTO –<br>H MV                                       | 53999616.0.2031.5330   |
| 2                                                                                  | Hospital Beneficência Portuguesa de São Paulo (São Paulo, São Paulo)                               | HOSPITAL BENEFICÊNCIA<br>PORTUGUESA DE SÃO PAULO                          | 53999616.0.2037.5483   |
| 3                                                                                  | Hospital Bom Jesus de Ponta Grossa (Ponta Grossa, Paraná)                                          | CENTRO DE ENSINO SUPERIOR DOS<br>CAMPOS<br>GERAIS - CESCAGE/PR            | 53999616.0.2061.5215   |
| 4                                                                                  | Hospital Bom Jesus de Toledo (Toledo, Paraná)                                                      | HOSPITAL MOINHOS DE VENTO –<br>H MV                                       | 53999616.0.2063.5330   |
| 5                                                                                  | Hospital Bruno Born (Lajeado, Rio Grande do Sul)                                                   | CENTRO UNIVERSITÁRIO UNIVATES                                             | 53999616.0.2027.5310   |
| 6                                                                                  | Casa de Saúde de Santos (Santos, São Paulo)                                                        | HOSPITAL GUILHERME<br>ALVARO                                              | 53999616.0.2020.5448   |
| 7                                                                                  | Hospital Cristo Redentor (Porto Alegre, Rio Grande do Sul)                                         | HOSPITAL NOSSA SENHORA<br>DA CONCEIÇÃO - GRUPO<br>HOSPITALAR CONCEIÇÃO    | 53999616.0.2035.5530   |
| 8                                                                                  | Hospital da Restauração (Recife, Pernambuco)                                                       | HOSPITAL DA RESTAURAÇÃO                                                   | 53999616.0.2055.5198   |
| 9                                                                                  | Hospital das Clínicas de Botucatu (Botucatu, São Paulo)                                            | UNESP -FACULDADE DE<br>MEDICINA DE BOTUCATU                               | 53999616.0.2017.5411   |
| 10                                                                                 | Hospital das Clínicas da Faculdade de Medicina de Ribeirão Preto – USP (Ribeirão Preto, São Paulo) | USP - HOSPITAL DAS<br>CLÍNICAS DA FACULDADE DE<br>MEDICINA DE RIBEIRÃO    | 53999616.0.2036.5440   |
| 11                                                                                 | Hospital das Clínicas de Minas Gerais (Belo Horizonte, Minas Gerais)                               | UNIVERSIDADE FEDERAL DE<br>MINAS GERAIS                                   | 53999616.0.2041.5149   |
| 12                                                                                 | Hospital das Clínicas de Rio Branco (Rio Branco, Acre)                                             | HOSPITAL DAS CLÍNICAS DO<br>ACRE - HCA/FUNDHACRE                          | 53999616.0.2070.5009   |
| 13                                                                                 | Hospital de Base de São José do Rio Preto (São José do Rio Preto, São Paulo)                       | FACULDADE DE MEDICINA DE<br>SÃO JOSÉ DO RIO PRETO - FAMERP<br>- SP        | 53999616.0.2082.5415   |
| 14                                                                                 | Hospital de Base do Distrito Federal (Brasília, Distrito Federal)                                  | FUNDAÇÃO DE ENSINO E PESQUISA<br>EM CIÊNCIAS DA<br>SAÚDE/ FEPECS/ SES/ DF | 53999616.0.2008.5553   |
| 15                                                                                 | Hospital de Pronto Socorro Nelson Marchezan (Canoas, Rio Grande do Sul)                            | HOSPITAL MOINHOS DE<br>VENTO – H MV                                       | 53999616.0.2081.5330   |

|    |                                                                                 |                                                            |                      |
|----|---------------------------------------------------------------------------------|------------------------------------------------------------|----------------------|
| 16 | Hospital de Clínicas de Porto Alegre (Porto Alegre, Rio Grande do Sul)          | HOSPITAL DE CLÍNICAS DE PORTO ALEGRE - HCPA / UFRGS        | 53999616.0.2010.5327 |
| 17 | Hospital de Ensino Doutor Washington Antônio de Barros (Petrolina, Pernambuco)  | FUNDAÇÃO UNIVERSIDADE FEDERAL DO VALE DO SÃO FRANCISCO     | 53999616.0.2056.5196 |
| 18 | Hospital de Pronto Socorro de Porto Alegre (Porto Alegre, Rio Grande do Sul)    | SECRETARIA MUNICIPAL DE SAÚDE DE PORTO ALEGRE/ SMSPA       | 53999616.0.2050.5338 |
| 19 | Hospital de Pronto Socorro Dr. João Lúcio Pereira Machado (Manaus, Amazonas)    | FUNDAÇÃO HOSPITAL ADRIANO JORGE – FHAJ                     | 53999616.0.2088.0007 |
| 20 | Hospital de Pronto Socorro João Paulo II (Porto Velho, Rondônia)                | HOSPITAL MOINHOS DE VENTO – HMV                            | 53999616.0.2072.5330 |
| 21 | Hospital de Urgência de Goiânia (Goiânia, Goiás)                                | HOSPITAL DE URGÊNCIA DE GOIÂNIA – HUGO                     | 53999616.0.2058.0033 |
| 22 | Hospital de Urgência e Emergência de Rio Branco (Rio Branco, Acre)              | HOSPITAL DAS CLÍNICAS DO ACRE - HCA/FUNDHACRE              | 53999616.0.2069.5009 |
| 23 | Hospital de Urgência de Sergipe (Aracaju, Sergipe)                              | HOSPITAL MOINHOS DE VENTO – HMV                            | 53999616.0.2073.5330 |
| 24 | Hospital Dr. Carlos Macieira (São Luís, Maranhão)                               | CENTRO UNIVERSITÁRIO DO MARANHÃO – UNICEUMA                | 53999616.0.2053.5084 |
| 25 | Hospital e Maternidade Angelina Caron (Campina Grande do Sul, Paraná)           | HOSPITAL E MATERNIDADE ANGELINA CARON/PR                   | 53999616.0.2052.5226 |
| 26 | Hospital Estadual de Urgência e Emergência de Vitória (Vitória, Espírito Santo) | CENTRO INTEGRADO DE ATENÇÃO A SAÚDE - CIAS/ UNIMED VITÓRIA | 53999616.0.2057.5061 |
| 27 | Hospital Estadual Getúlio Vargas (Rio de Janeiro, Rio de Janeiro)               | HOSPITAL MOINHOS DE VENTO – HMV                            | 53999616.0.2093.5330 |
| 28 | Hospital Evangélico de Londrina (Londrina, Paraná)                              | ASSOCIAÇÃO EVANGÉLICA BENEFICENTE DE LONDRINA – AEBEL      | 53999616.0.2014.5696 |
| 29 | Hospital Geral Cleriston Andrade (Feira de Santana, Bahia)                      | SECRETARIA DA SAÚDE DO ESTADO DA BAHIA - SESAB             | 53999616.0.2048.0052 |
| 30 | Hospital Geral de Fortaleza (Fortaleza, Ceará)                                  | HOSPITAL GERAL DE FORTALEZA/SUS                            | 53999616.0.2076.5040 |
| 31 | Hospital Geral de Nova Iguaçu (Nova Iguaçu, Rio de Janeiro)                     | HOSPITAL GERAL DE NOVA IGUAÇU (HGNI) – RJ                  | 53999616.0.2046.5254 |
| 32 | Hospital Geral de Taipas (São Paulo, São Paulo)                                 | HOSPITAL MOINHOS DE                                        | 53999616.0.2086.5330 |

|    |                                                                                                     |                                                                           |                      |
|----|-----------------------------------------------------------------------------------------------------|---------------------------------------------------------------------------|----------------------|
|    |                                                                                                     | VENTO – HMV                                                               |                      |
| 33 | Hospital Geral Prof. Osvaldo Brandão Vilela<br>(Maceió, Alagoas)                                    | CENTRO UNIVERSITÁRIO<br>TIRADENTES - UNIT/AL                              | 53999616.0.2071.5641 |
| 34 | Hospital Instituto Dr. José Frota (Fortaleza, Ceará)                                                | INSTITUTO DR. JOSÉ FROTA -<br>IJF/ PREFEITURA DE<br>FORTALEZA             | 53999616.0.2075.5047 |
| 35 | Hospital João XXIII Fundação Hospitalar do Estado<br>de Minas Gerais (Belo Horizonte, Minas Gerais) | FUNDAÇÃO HOSPITALAR DO<br>ESTADO DE MINAS GERAIS -<br>FHEMIG              | 53999616.0.2099.5119 |
| 36 | Hospital Municipal Irmã Dulce (Praia Grande, São<br>Paulo)                                          | FACULDADE DE MEDICINA DO<br>ABC\FUNDAÇÃO DO ABC -<br>FMABC                | 53999616.0.2083.0082 |
| 37 | Hospital Norte Paranaense (Arapongas, Paraná)                                                       | HOSPITAL NORTE<br>PARANAENSE - ASSOCIAÇÃO<br>NORTE PARANAENSE             | 53999616.0.2067.8017 |
| 38 | Hospital Nossa Senhora do Rocio de Campo Largo<br>(Campo Largo, Paraná)                             | UFPR - HOSPITAL DE CLÍNICAS DA<br>UNIVERSIDADE FEDERAL DO<br>PARANÁ       | 53999616.0.2064.0096 |
| 39 | Hospital Padre Germano Lauck (Foz do Iguaçu,<br>Paraná)                                             | UNIOESTE – CENTRO DE CIÊNCIAS<br>BIOLÓGICAS E DA SAÚDE DA<br>UNIVERSIDADE | 53999616.0.2091.0107 |
| 40 | Hospital Paulistano (São Paulo, São Paulo)                                                          | HOSPITAL PRÓ-CARDÍACO -<br>ESHO EMPRESA DE<br>SERVIÇOS HOSPITALARES       | 53999616.0.2084.5533 |
| 41 | Hospital Regional do Cariri (Juazeiro do Norte,<br>Ceará)                                           | INSTITUTO DE SAÚDE E<br>GESTÃO HOSPITALAR - ISGH                          | 53999616.0.2077.5684 |
| 42 | Hospital Regional do Vale do Paraíba (Taubaté, São<br>Paulo)                                        | UNITAU - UNIVERSIDADE DE<br>TAUBATÉ                                       | 53999616.0.2097.5501 |
| 43 | Hospital Regional Norte (Sobral, Ceará)                                                             | INSTITUTO DE SAÚDE E<br>GESTÃO HOSPITALAR - ISGH                          | 53999616.0.2045.5684 |
| 44 | Hospital Regional Tarcísio de Vasconcelos Maia<br>(Natal, Rio Grande do Norte)                      | HOSPITAL MOINHOS DE<br>VENTO – HMV                                        | 53999616.0.2079.5330 |
| 45 | Hospital Santa Rita de Maringá (Maringá, Paraná)                                                    | HOSPITAL MOINHOS DE<br>VENTO – HMV                                        | 53999616.0.2066.5330 |
| 46 | Hospital São Paulo (São Paulo, São Paulo)                                                           | UNIFESP - HOSPITAL SÃO PAULO -<br>HOSPITAL UNIVERSITÁRIO                  | 53999616.0.2003.5505 |
| 47 | Hospital São Vicente de Paulo (Passo Fundo, Rio<br>Grande do Sul)                                   | UNIVERSIDADE DE PASSO<br>FUNDO/ PRÓ-REITORIA DE<br>PESQUISA E PÓS         | 53999616.0.2032.5342 |

|    |                                                                                                                 |                                                                                           |                      |
|----|-----------------------------------------------------------------------------------------------------------------|-------------------------------------------------------------------------------------------|----------------------|
| 48 | Hospital São Vicente de Paulo Guarapuava (Guarapuava, Paraná)                                                   | UNIVERSIDADE ESTADUAL DO CENTRO OESTE - UNICENTRO                                         | 53999616.0.2068.0106 |
| 49 | Hospital Universitário Ciências Médicas (Belo Horizonte, Minas Gerais)                                          | COMITÊ DE ÉTICA EM PESQUISA CIÊNCIAS MÉDICAS - MG (CEPCM-MG)                              | 53999616.0.2033.5134 |
| 50 | Hospital Universitário de Cascavel do Oeste do Paraná (Cascavel, Paraná)                                        | UNIOESTE - CENTRO DE CIÊNCIAS BIOLÓGICAS E DA SAÚDE DA UNIVERSIDADE                       | 53999616.0.2043.0107 |
| 51 | Hospital Universitário de Maringá (Maringá, Paraná)                                                             | UNIVERSIDADE ESTADUAL DE MARINGÁ                                                          | 53999616.0.2026.0104 |
| 52 | Hospital Universitário Regional do Norte do Paraná (Londrina, Paraná)                                           | UNIVERSIDADE ESTADUAL DE LONDRINA – UEL                                                   | 53999616.0.2002.5231 |
| 53 | Hospital Universitário Regional dos Campos Gerais (Ponta Grossa, Paraná)                                        | FACULDADES PONTA GROSSA/ PR                                                               | 53999616.0.2060.5689 |
| 54 | Hospital Universitário São Francisco de Paula (Pelotas, Rio Grande do Sul)                                      | UNIVERSIDADE CATÓLICA DE PELOTAS - UCPEL                                                  | 53999616.0.2016.5339 |
| 55 | Hospital Universitário São Francisco da Providência de Deus de Bragança Paulista (Bragança Paulista, São Paulo) | UNIVERSIDADE SÃO FRANCISCO-SP                                                             | 53999616.0.2030.5514 |
| 56 | Irmandade da Santa Casa de Misericórdia de São Paulo (São Paulo, São Paulo)                                     | SANTA CASA DE MISERICÓRDIA DE SÃO PAULO                                                   | 53999616.0.2029.5479 |
| 57 | Irmandade Santa Casa de Misericórdia de Sorocaba (Sorocaba, São Paulo)                                          | FACULDADE DE CIÊNCIAS MÉDICAS E DA SAÚDE DA PONTIFÍCIA UNIVERSIDADE CATÓLICA DE SÃO PAULO | 53999616.0.2096.5373 |
| 58 | Santa Casa de Belo Horizonte (Belo Horizonte, Minas Gerais)                                                     | SANTA CASA DE MISERICÓRDIA DE BELO HORIZONTE - SCMBH                                      | 53999616.0.2028.5138 |
| 59 | Santa Casa de Campo Grande (Campo Grande, Mato Grosso do Sul)                                                   | HOSPITAL MOINHOS DE VENTO - HMV                                                           | 53999616.0.2059.5330 |
| 60 | Santa Casa de Misericórdia de Maringá (Maringá, Paraná)                                                         | HOSPITAL MOINHOS DE VENTO - HMV                                                           | 53999616.0.2062.5330 |
| 61 | Irmandade da Santa Casa de Porto Alegre (Porto Alegre, Rio Grande do Sul)                                       | IRMANDADE DA SANTA CASA DE MISERICÓRDIA DE PORTO ALEGRE - ISCMPA                          | 53999616.0.2013.5335 |
| 62 | Santa Casa de Misericórdia de Sobral (Sobral, Ceará)                                                            | UNIVERSIDADE ESTADUAL VALE DO ACARAÚ - UVA                                                | 53999616.0.2078.5053 |
| 63 | Hospital Municipal Djalma Marques (São Luís, Maranhão)                                                          | HOSPITAL E MATERNIDADE SÃO DOMINGOS                                                       | 53999616.0.2080.5085 |
